# Supplementary material for: Lattice hydrogen transfer in titanium hydride enhances electrocatalytic nitrate to ammonia conversion
Source: PubMed Central journal article supplement — Nat Commun. 2024 Nov 3;15:9499. doi: 10.1038/s41467-024-53833-x (PMC11532501; doi:10.1038/s41467-024-53833-x), 2024-11-03
Supplement: 41467_2024_53833_MOESM1_ESM.pdf [file 41467_2024_53833_MOESM1_ESM.pdf]

# **Lattice Hydrogen Transfer in Titanium Hydride Enhances Electrocatalytic Nitrate to Ammonia Conversion**

Jiawei Li<sup>1</sup>, Wanqiang Yu<sup>1</sup>, Haifeng Yuan<sup>1</sup>, Yujie Wang<sup>1</sup>, Yuke Chen<sup>1</sup>, Di Jiang<sup>1</sup>, Tong Wu<sup>1</sup>, Kepeng Song<sup>2</sup>, Xuchuan Jiang<sup>3</sup>, Hong Liu<sup>1,4</sup>, Riming Hu<sup>3\*</sup>, Man Huang<sup>1\*</sup>, Weijia Zhou<sup>1\*</sup>

<sup>1</sup>Institute for Advanced Interdisciplinary Research (iAIR), School of Chemistry and Chemical Engineering, University of Jinan, Jinan, 250022, P. R. China

<sup>2</sup>Electron Microscopy Center, Shandong University, 27 Shandanan Road, Jinan, Shandong 250100, P. R. China

<sup>3</sup>Institute for Smart Materials & Engineering, University of Jinan, Jinan 250022, P.R. China

<sup>4</sup>State Key Laboratory of Crystal Materials, Shandong University, 27 Shandanan Road, Jinan, Shandong, 250100, P. R. China

\*Email: ifc\_zhouwj@ujn.edu.cn (W. J. Zhou); ifc\_huangm@ujn.edu.cn (M. Huang); ism\_hurm@ujn.edu.cn (R. M. Hu)

**Supplementary Methods**

**Supplementary Figures**

**Supplementary Tables**

**Supplementary References**

**Geometrical coordinates of model structures**

## **Experimental Methods**

### **Characterization**

The crystal structure of the prepared electrocatalysts were determined by Smartlabse (RIGAKU) X-ray diffractometer (XRD) with Cu K $\alpha$  radiation ( $\lambda=0.15406$  nm). The microstructure and morphology were clarified by Regulus 8100 (HITACHI) Field Emission Scanning Electron Microscope (FESEM) and JEM-2100F (JEOL) transmission electron microscope (TEM) at an acceleration voltage of 200 kV. High-angle annular dark-field scanning TEM (HAADF-STEM) image images were taken on an ARM-200CF (JEOL, Tokyo, Japan) transmission electron microscope, operating at 200 kV, to analyze the microzone structure. A UV-vis spectrophotometer (EVOLUTION 201, Thermo Scientific Corporation) measurements in the range of 200-1000 nm.  $^1\text{H}$ -NMR measurements were performed on Bruker AVANCE III HD 600 MHz Nuclear Magnetic Resonance System (NMR-600). X-ray absorption fine structure (XAFS) measurements of the Ti K-edge in transmission mode for Ti foil and titanium hydride powder were performed at Beijing Synchrotron Radiation Facility (BL1W1B station), China.

### **Isotope labeled active hydrogen transfer in NIRR.**

Positive validation method for the participation of lattice hydrogen in hydrogenation reactions in titanium hydride. In an H-type electrolysis cell, a  $\text{TiH}_{1.97}/\text{Ti}$  catalyst was prepared. A  $\text{D}_2\text{O}$  solution containing 1 M NaOD and 0.1 M  $\text{KNO}_3$  was used as the electrolyte for NIRR. Both the Ti FP and the synthesized  $\text{TiH}_{1.97}/\text{Ti}$  electrode were rinsed with  $\text{D}_2\text{O}$  for 10 minutes and dried at 250 °C under argon for 24 h to remove  $\text{H}_2\text{O}$ . NIRR was conducted at  $-0.7$  V vs. RHE for 5 min, after which 10 mL of

electrolyte was taken out and adjusted to pH = 4 with 2 M D<sub>2</sub>SO<sub>4</sub>, and the resulting products, NH<sub>3</sub> and ND<sub>3</sub>, were explored using <sup>1</sup>H NMR.

Reverse validation method for the participation of lattice hydrogen in hydrogenation reactions in titanium hydride. In an H-type electrolysis cell, a TiD<sub>1.97</sub>/Ti catalyst was prepared by cathodic electrochemical reconstruction for 30 min in a D<sub>2</sub>O + NaOD + NO<sub>3</sub><sup>-</sup> solution. Subsequently, an H<sub>2</sub>O solution containing 1 M NaOH and 0.1 M KNO<sub>3</sub> was used as the electrolyte for NIRR. NIRR was conducted at -0.7 V vs. RHE for 5 min, after which 10 mL of electrolyte was taken out and adjusted to pH = 4 with 2 M D<sub>2</sub>SO<sub>4</sub>, and the resulting products, NH<sub>3</sub> and ND<sub>3</sub>, were explored using <sup>1</sup>H NMR. The flow diagram for positive and reverse validation as flow:

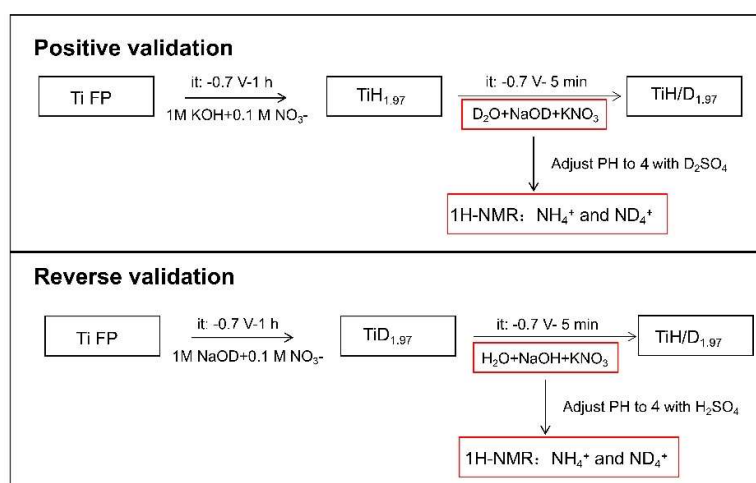

### Determination of ion concentration

The ultraviolet-visible (UV-Vis) spectrophotometer was used to detect the ion concentration of pre-test and post-test electrolytes after diluting to appropriate concentration to match the range of calibration curves (Fig. S10). The specific detection methods were described as follows.

### Determination of ammonia-N

Ammonia-N was determined using salicylic acid-potassium sodium tartrate chromogenic reagent as the color reagent. First, a certain amount of electrolyte was

taken out from the electrolytic cell and diluted to 5 mL to detection range. Next, 0.5 mL salicylic acid-potassium sodium tartrate chromogenic reagent was added and mixed thoroughly, then 0.05 mL sodium nitroprusside and 0.05 mL sodium hypochlorite solution were put into the solution. The absorption intensity at a wavelength of 655 nm was recorded after sitting for 1 h. The concentration-absorbance curve was calibrated using a series of standard ammonium chloride solutions and the ammonium chloride crystal was dried at 105 °C for 2 h in advance.

#### **Determination of nitrate-N**

Firstly, a certain amount of electrolyte was taken out from the electrolytic cell and diluted to 5 mL to detection range. Then, 0.1 mL 1 M HCl and 0.01 mL 0.8 wt% sulfamic acid solution were added into the aforementioned solution. The absorption spectrum was measured using an UV-Vis spectrophotometer and the absorption intensities at a wavelength of 220 nm were recorded. The final absorbance value was calculated by this equation:  $A = A_{220nm}$ . The concentration-absorbance curve was calibrated using a series of standard potassium nitrate solutions and the potassium nitrate crystal was dried at 105-110 °C for 2 h in advance.

#### **Determination of nitrite-N**

A mixture of p-aminobenzene sulfonamide (4 g), N-(1-Naphthyl) ethylenediamine dihydrochloride (0.2 g), ultrapure water (50 mL) and phosphoric acid (10 mL,  $\rho=1.70$  g mL<sup>-1</sup>) was used as a color reagent. A certain amount of electrolyte was taken out from the electrolytic cell and diluted to 10 mL to detection range. Next, 0.1 mL color reagent was added into the aforementioned 10 mL solution and mixed uniformly, and the absorption intensity at a wavelength of 540 nm was recorded after sitting for 20 min. The concentration-absorbance curve was calibrated using a series of standard sodium nitrite solutions.

## Isotope Labeling Experiments.

99.21%  $\text{K}^{15}\text{NO}_3$  was used as the feeding N-source to perform the isotopic labeling nitrate reduction experiments to clarify the source of ammonia. 1 M KOH was used as electrolyte and  $\text{K}^{15}\text{NO}_3$  with a concentration of 0.1 M  $^{15}\text{NO}_3^-$ - $^{15}\text{N}$  was added into the cathode compartment as the reactant. After electroreduction, electrolyte with obtained  $^{15}\text{NH}_4^+$ - $^{15}\text{N}$  was taken out and the pH value was adjusted to be weak acid with 2 M  $\text{H}_2\text{SO}_4$  for further analysis by  $^1\text{H}$  NMR (600 MHz) with external standards of maleic acid.

## Computational details

All the spin-polarized density functional theory calculations were performed by using the Vienna ab initio Simulation Program (VASP)<sup>1, 2</sup>. The generalized gradient approximation (GGA) in the Perdew-Burke-Ernzerhof (PBE) form and a cutoff energy of 500 eV for planewave basis set were adopted<sup>3</sup>. A  $3 \times 3 \times 1$  Monkhorst-Pack grid was used for sampling the Brillouin zones at structure optimization<sup>4</sup>. The ion-electron interactions were described by the projector augmented wave (PAW) method<sup>5</sup>. A Gaussian smearing of 0.05 eV to the orbital occupation was applied during the geometry optimization and for the total energy computations. The convergence criteria of structure optimization were choose as the maximum force on each atom less than  $0.02 \text{ eV}/\text{\AA}$  with an energy change less than  $1 \times 10^{-5} \text{ eV}$ . Periodic slabs with  $2 \times 3$  and  $2 \times 2$  supercell were applied to model the catalyst surfaces, respectively, and a sufficient vacuum of  $18 \text{ \AA}$  was considered in the orthogonal direction to avoid periodic interaction. The DFT-D3 semiempirical correction was described via Grimme's scheme method<sup>6</sup>. According to previously reports, the effective strength parameter ( $U_{eff} = U - J$ ) of the Hubbard on-site Coulomb correlation were set at 2.58 eV for Ti element<sup>7</sup>.

The implicit solvent model (VASPsol) was adopted since the reaction normally takes place in an aqueous solution<sup>8</sup>. To calculate the kinetic energy barrier of chemical reactions, the climbing image nudged elastic band (CI-NEB) method with 6 images was used to search for the transition states (vibrational frequencies were evaluated to confirm minima and transition states), in which all of the force components perpendicular to the tangent of the reaction path were relaxed to be less than 0.05 eV/Å<sup>9</sup>.

The Gibbs free energy change ( $\Delta G$ ) for each elemental step is defined as<sup>10, 11</sup>:

$$\Delta G = \Delta E + \Delta ZPE - T\Delta S + \Delta G_U + \Delta G_{pH} \quad (1)$$

where  $\Delta E$  and  $\Delta ZPE$  are the adsorption energy based on density functional theory calculations and the zero-point energy correction, respectively.  $T$ ,  $\Delta S$ ,  $U$ , and  $\Delta G_{pH}$  represent the temperature ( $T = 298$  K), the entropy change, the applied electrode potential, and the free energy correction of the pH ( $pH = 0$ ), respectively. In addition, the atomic coordinates of the optimized computational models had been provided as a separate supporting file named as supplementary data 1.

## Supplementary Figures

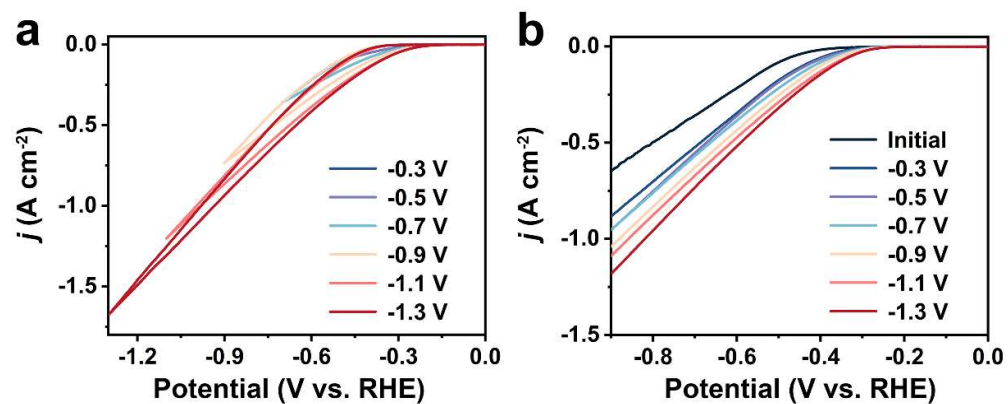

**Fig. S1 (a)** Cyclic voltammograms within the different range from 0 V to -1.3 V vs.

RHE. **(b)** Corresponding polarization curves after **(a)**. (without  $iR$  compensation)



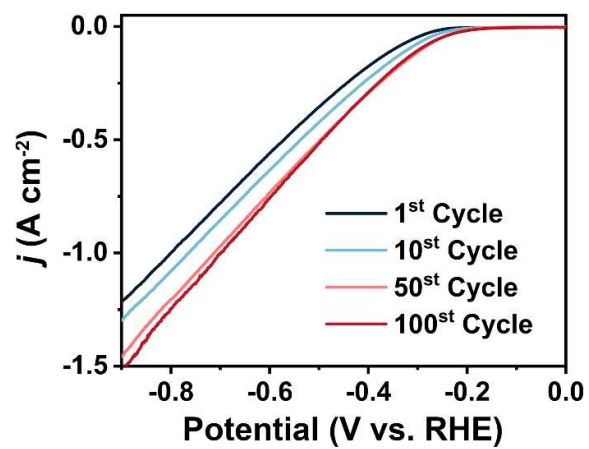

**Fig. S2** Corresponding polarization curves after Cyclic voltammograms of different cycles from  $-1.3$  V vs. RHE. (without  $iR$  compensation)

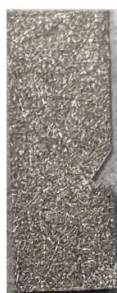

**Ti FP**

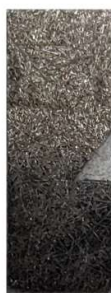

**TiH<sub>1.97</sub>/Ti**

**Fig. S3** The digital images of Ti FP and TiH<sub>1.97</sub>/Ti.

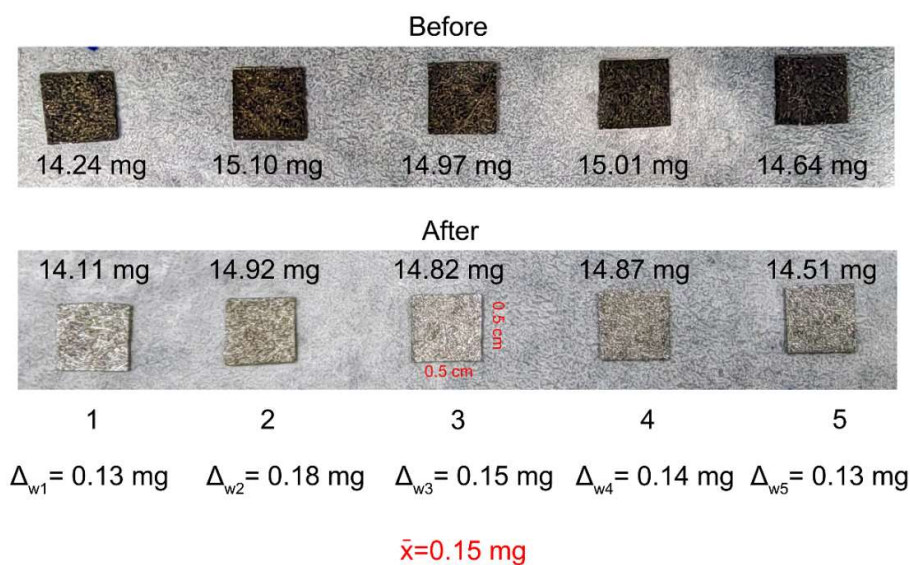

**Fig. S4** Weighing the difference in mass before and after the reaction with 0.1 M HCl.

Note: We used the strong oxidizing agent (HCl: 0.1 M) to undergo a chemical reaction with the electrode ( $\text{TiH}_{1.97}/\text{Ti}$ ). By weighing the difference in mass before and after the reaction (Fig. S4), we could obtain the weight of the titanium hydride loaded on the electrode (data from five sets of measurements were taken and the average was calculated). This was because metal hydrides are highly reactive with hydrochloric acid, while metallic titanium did not react with HCl, so the weight loss on the electrode belongs to titanium hydride. Through calculation, we obtained a titanium hydride loading of  $0.6 \text{ mg cm}^{-2}$  on the electrodes.

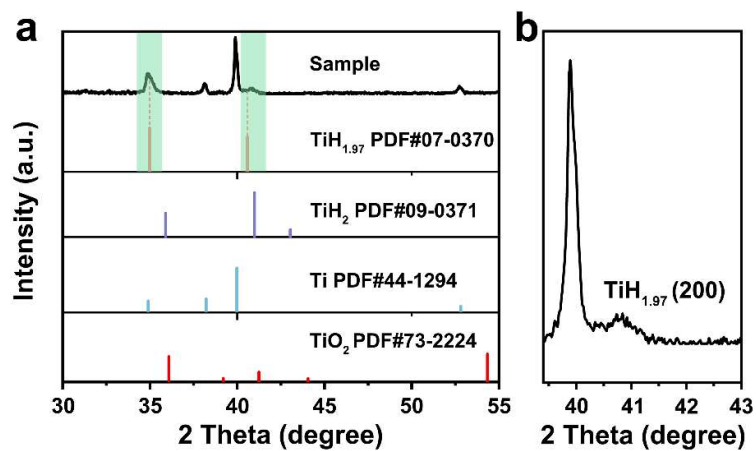

**Fig. S5 (a)** The XRD spectrum for electrode and the standard spectra of Ti (PDF#44-1294), TiO<sub>2</sub> (PDF#73-2224), TiH<sub>2</sub> (PDF#09-0371) and TiH<sub>1.97</sub> (PDF#07-0370) and **(b)** the magnified local image of the characteristic peak corresponding to TiH<sub>1.97</sub> (200).

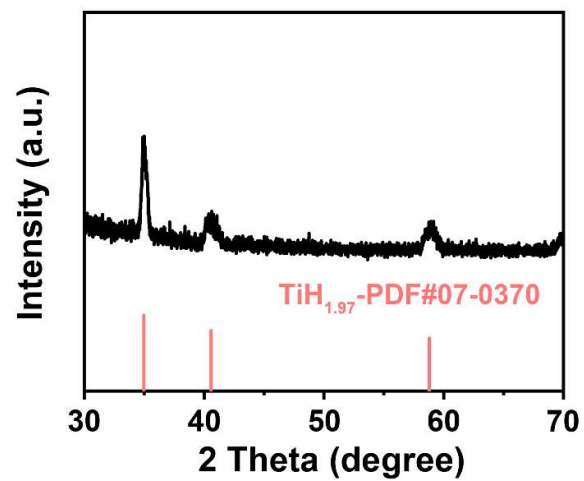

**Fig. S6** A separate XRD test of the TiH<sub>1.97</sub> on the electrode surface.

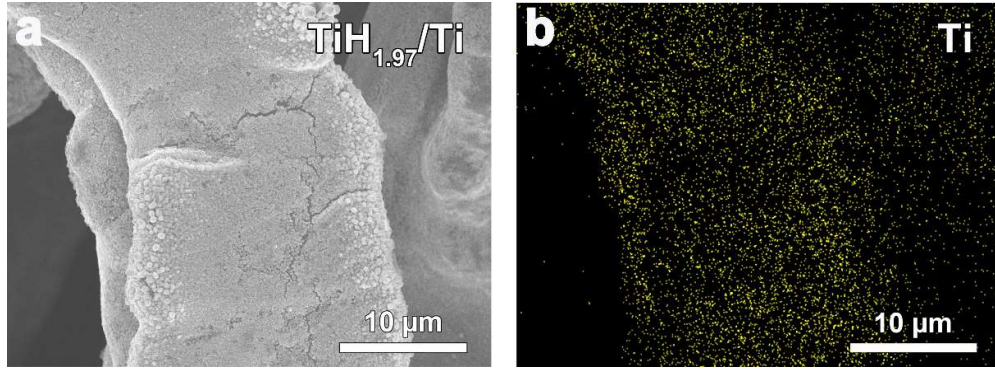

**Fig. S7** EDX mappings of titanium hydride.

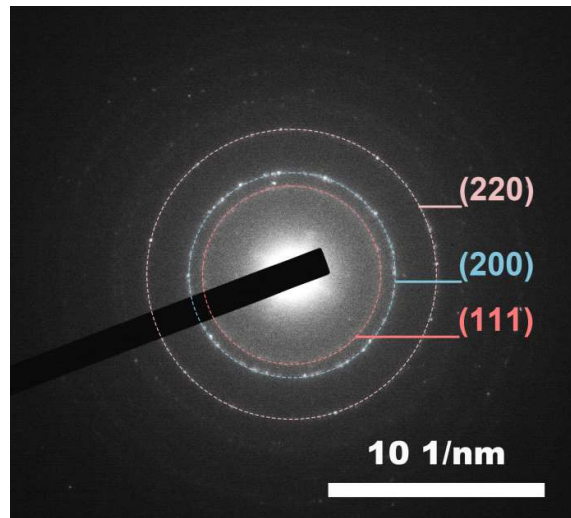

**Fig. S8** SAED pattern of the titanium hydride.

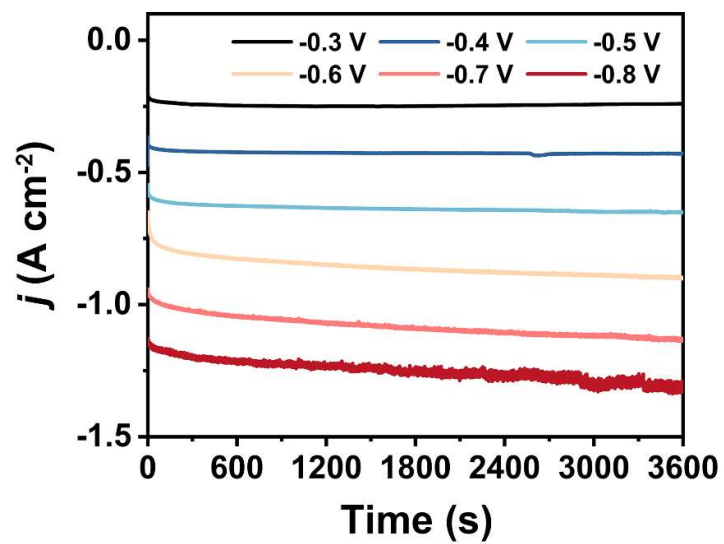

**Fig. S9** i-t curves of the titanium hydride catalyst against various work potentials obtained in  $\text{NO}_3^-$  electrolyte after the NIRr test. (without iR compensation)



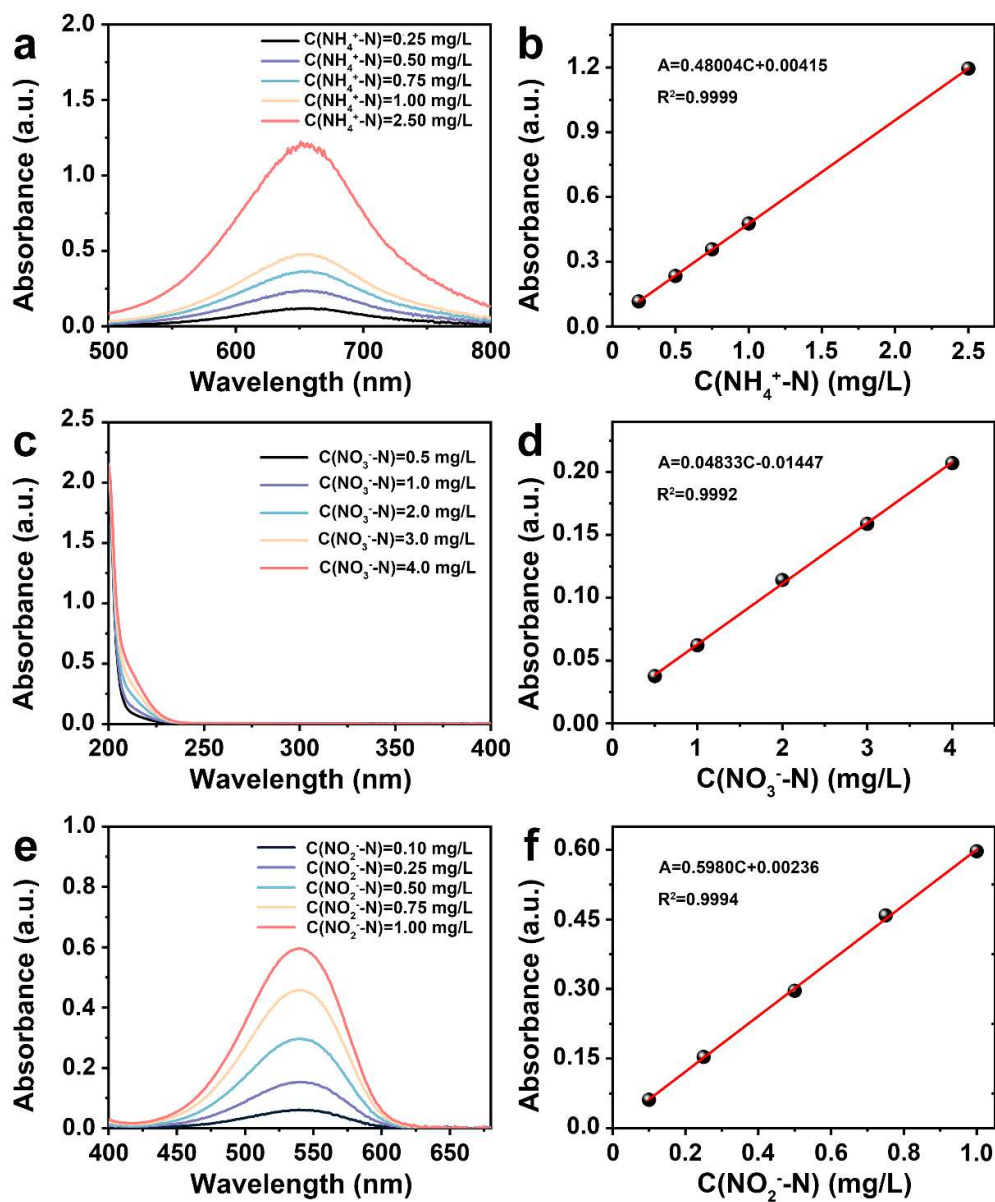

**Fig. S10** Plotting of standard curves of (a, b)  $\text{NH}_4^+\text{-N}$ , (c, d)  $\text{NO}_3^-\text{-N}$  and (e, f)  $\text{NO}_2^-\text{-N}$

N The calibration curves all show good linearity.

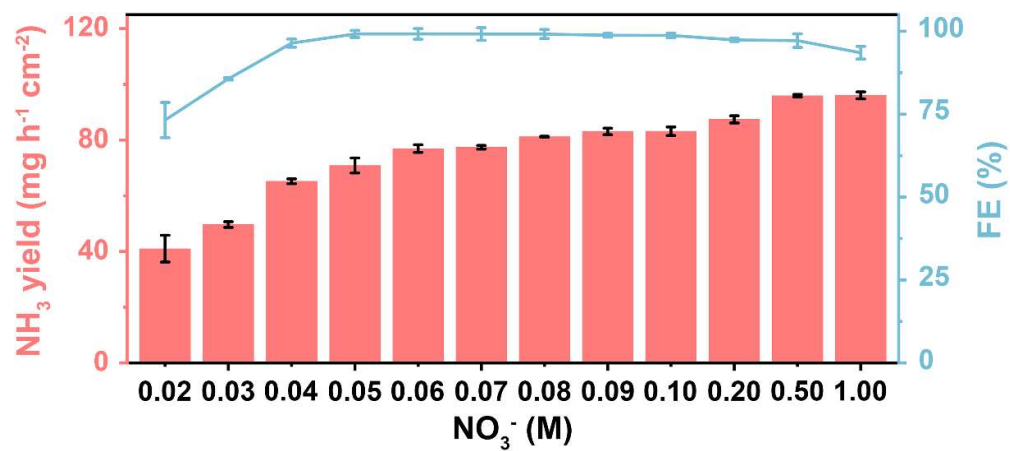

**Fig. S11**  $\text{NH}_3$  yield and FE for titanium hydride at  $\text{NO}_3^-$  concentration of 0.02, 0.03, 0.04, 0.05, 0.06, 0.07, 0.08, 0.09, 0.10, 0.20, 0.50 and 1.00 M. The  $\text{NH}_3$  yield and FE are calculated once per hour. Error bars indicate their relative standard deviations of the mean ( $n=3$ ).

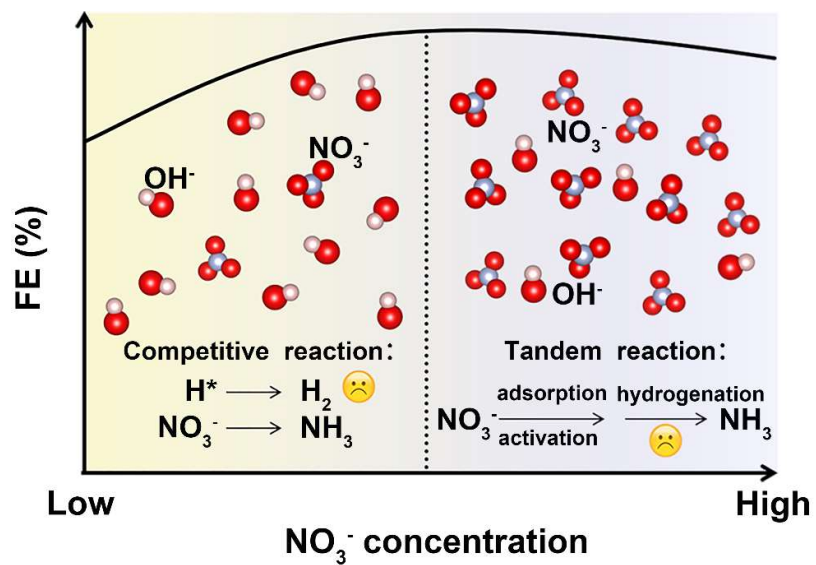

**Fig. S12** The schematic diagram of the effect of  $\text{NO}_3^-$  concentration on FE. The light purple, red and pink spheres represent N, O, and H atoms, respectively.

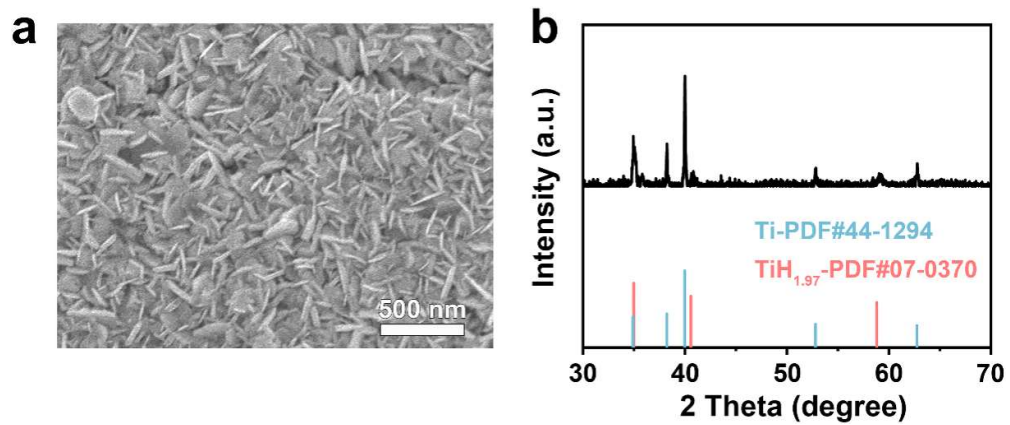

**Fig. S13 (a)** SEM image and **(b)** XRD patterns of titanium hydride after stability testing.

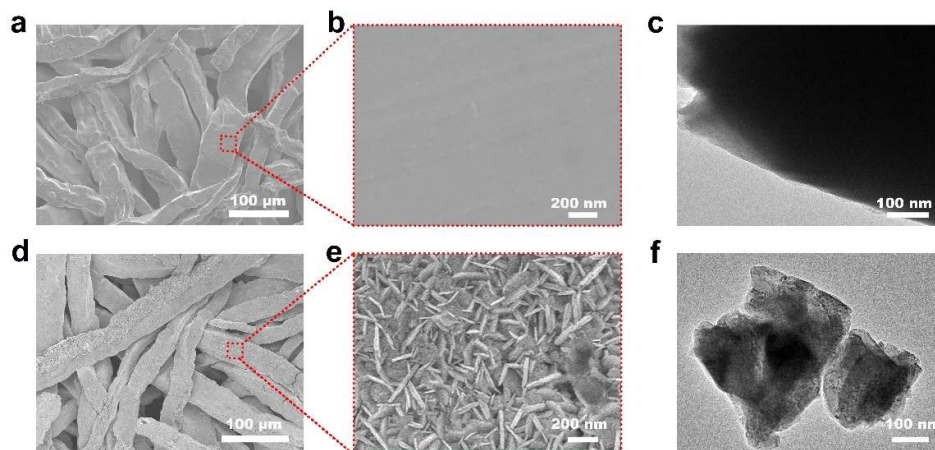

**Fig. S14 (a, b)** SEM and **(c)** TEM images of the original Ti FP. **(d, e)** SEM and **(f)** TEM images of the titanium hydride after electrocatalysis.

**Note:** Based on the SEM images in Fig. S14a and the locally magnified image (Fig. S14b), it could be seen that the Ti FP were formed by the intertwined and interwoven titanium fibers, and the diameter of a single titanium fiber was approximately 60 μm. The surface of the titanium fibers was smooth and free of any impurities. The TEM image (Fig. S14c) also showed the smooth surface and solid structure of the titanium fibers. After NIRR treatment,  $\text{TiH}_{1.97}/\text{Ti}$  still maintained the mesh-like structure of the titanium fiber paper (Fig. S14d), and the titanium hydride nanosheets on the surface did not undergo significant morphological changes compared to the pre-electrocatalysis (Fig. S14e and Fig. 1g). The TEM image (Fig. S14f) also showed that the surface of the nanosheets remained smooth after electrochemical catalysis, further indicating the good structural stability of the catalyst.

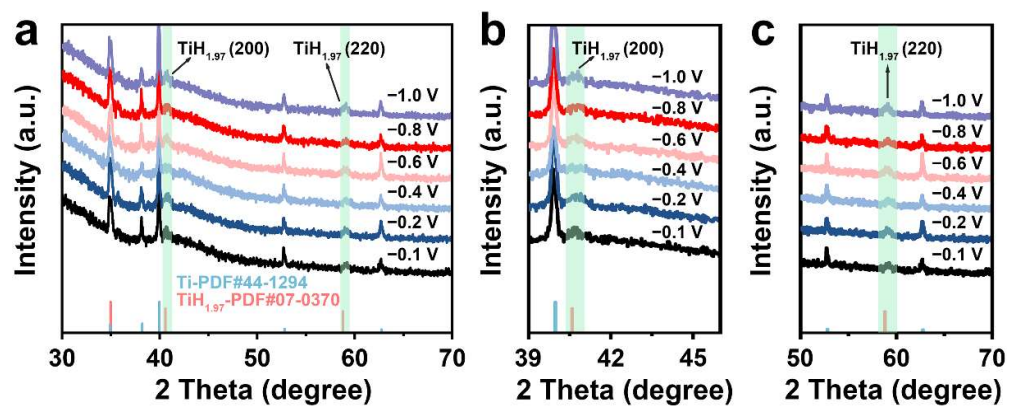

**Fig. S15** (a) XRD spectrum of electrode during NIRR at applied potentials of  $-0.1$ ,  $-0.2$ ,  $-0.4$ ,  $-0.6$ ,  $-0.8$  and  $-1.0$  V vs. RHE. The magnified local image of the characteristic peak corresponding to (b)  $\text{TiH}_{1.97}(200)$  and (c)  $\text{TiH}_{1.97}(220)$ .

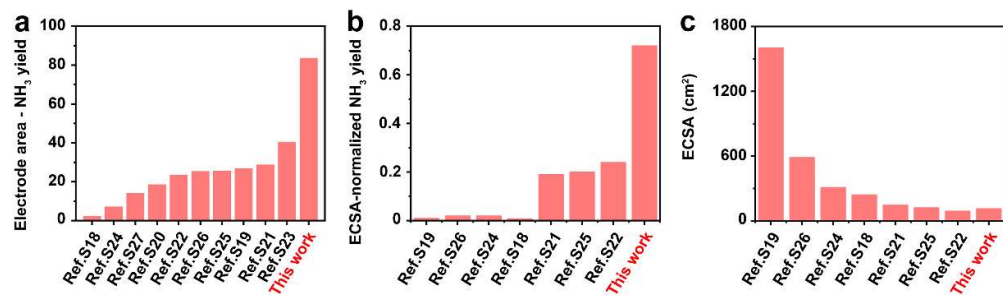

**Fig. S16** Comparison of the (a) Electrode area - NH<sub>3</sub> yield (mg h<sup>-1</sup> cm<sup>-2</sup>), (b) ECSA-normalized NH<sub>3</sub> yield and (c) ECSA with other literatures.

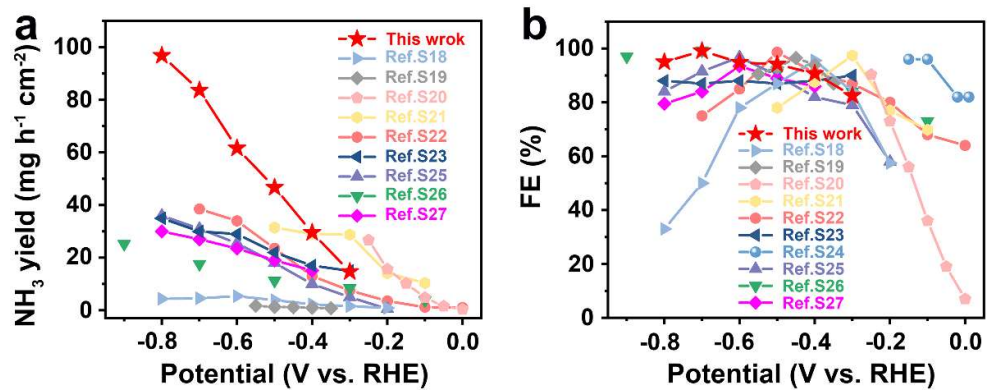

**Fig. S17** The comparison of **(a)** NH<sub>3</sub> yields and **(b)** FE under different voltages with other literature. (without iR compensation)



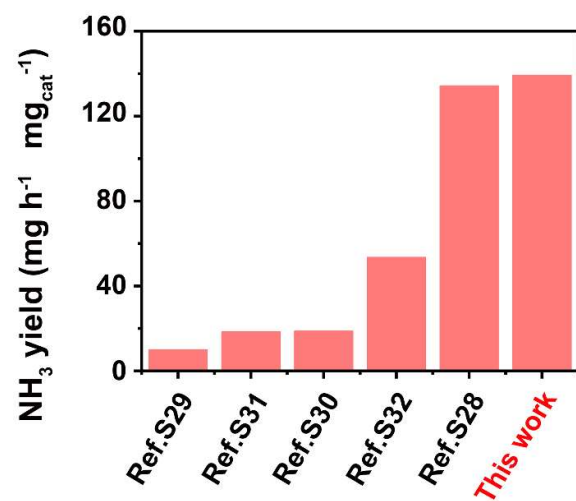

**Fig. S18** Comparison of the NH<sub>3</sub> yield with other literature by weight of titanium hydride powder.

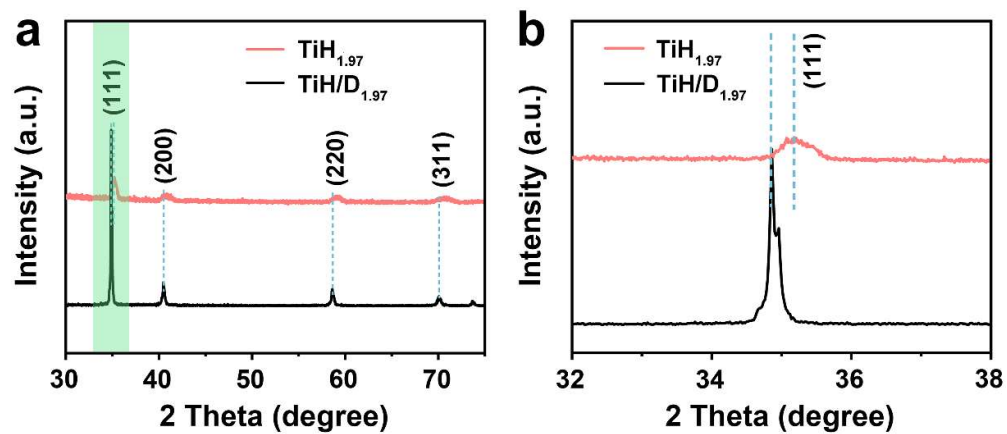

**Fig. S19 (a)** XRD spectrum of electrode before and after the isotope tracking experiments. **(b)** The local amplification of the characteristic peaks corresponding to the (111) lattice plane.

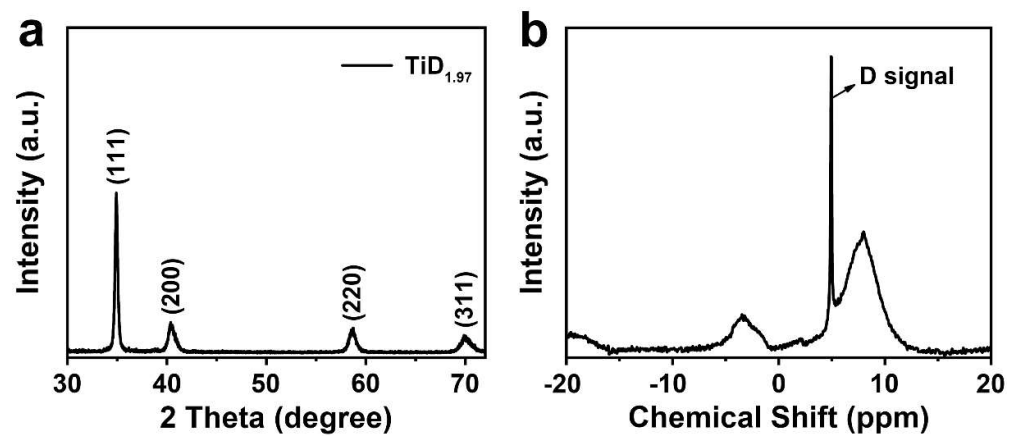

Fig. S20 (a) XRD and (b) solid-state NMR spectra for  $\text{TiD}_{1.97}$ .

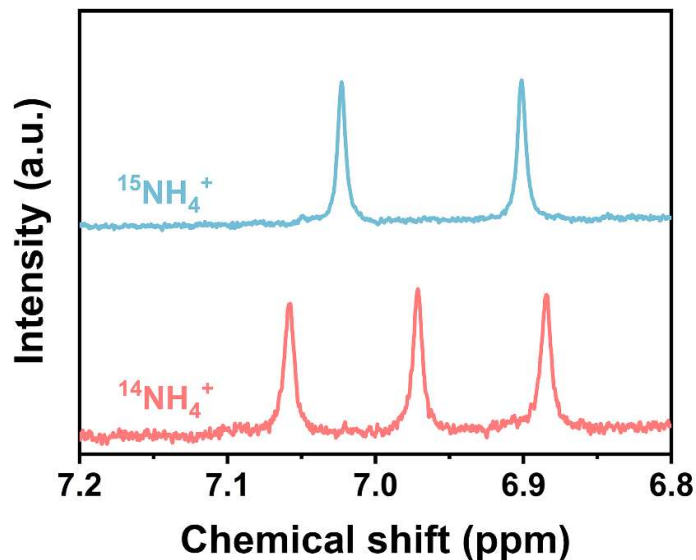

**Fig. S21** <sup>1</sup>H NMR spectra of the electrolyte after the NIRR using <sup>15</sup>NO<sub>3</sub><sup>-</sup> as the feedstock.

**Note:** To confirm that the isotopic labeling experiments were conducted using <sup>15</sup>NO<sub>3</sub><sup>-</sup> and <sup>14</sup>NO<sub>3</sub><sup>-</sup> as reactants, respectively. The <sup>15</sup>NH<sub>3</sub> signal, a classic marker, was detected at  $\delta = 6.90$  and  $7.02$  ppm in the <sup>1</sup>H nuclear magnetic resonance (NMR) spectrum with <sup>15</sup>NO<sub>3</sub><sup>-</sup> as the feedstock (Fig. S21), showing no difference compared to the <sup>1</sup>H NMR spectrum of (<sup>15</sup>NH<sub>4</sub>)<sub>2</sub>SO<sub>4</sub>. Similarly, using <sup>14</sup>NO<sub>3</sub><sup>-</sup> as the reactant in the electrolyte yielded consistent detection results with that of (<sup>14</sup>NH<sub>4</sub>)<sub>2</sub>SO<sub>4</sub> via <sup>1</sup>H NMR analysis, illustrating that the NH<sub>3</sub> was generated entirely by NIRR<sup>12</sup>.

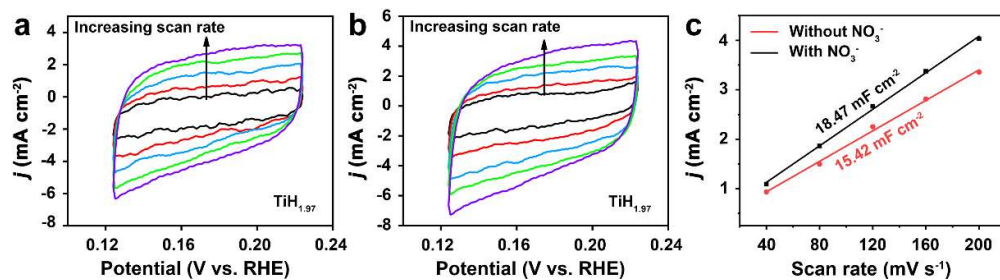

**Fig. S22** CV curves of (a) Titanium hydride in 1 M KOH. (b) Titanium hydride in 1 M KOH with 0.1 M  $\text{NO}_3^-$ . (c) Plots of the current density versus the scan rate for the samples above. (without iR compensation)

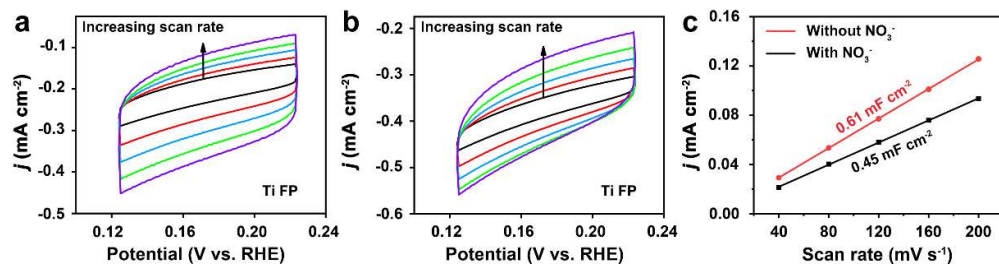

**Fig. S23** CV curves of (a) Ti FP in 1 M KOH. (b) Ti FP in 1 M KOH with 0.1 M NO<sub>3</sub><sup>-</sup>.

(c) Plots of the current density versus the scan rate for the samples above. (without iR compensation)

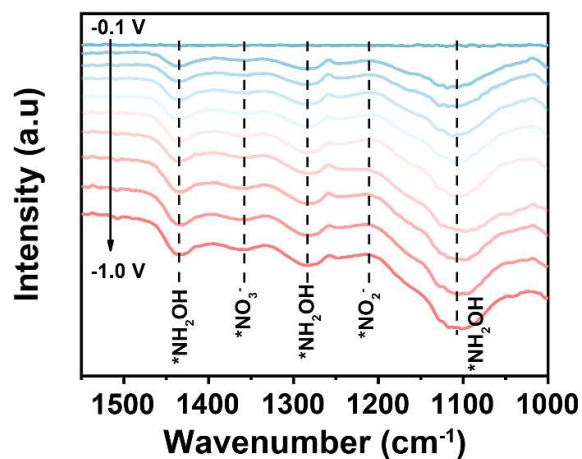

**Fig. S24** In-situ ATR FTIR spectra of different intermediates in NIRR pathway.

**Note:** We employed in-situ Attenuated Total Reflection Fourier Transform Infrared Spectroscopy (ATR-FTIR) to monitor intermediates adsorbed on the titanium hydride. As shown in Fig. S24, five distinct absorption bands were observed in the spectra of  $\text{TiH}_{1.97}$ <sup>13, 14</sup>. Initially, as the potential increased, the absorption bands at  $1354\text{ cm}^{-1}$ , corresponding to the symmetric and asymmetric N-O stretching of  $\text{NO}_3^-$ , indicated the consumption of  $\text{NO}_3^-$ . Concurrently, the downward band at  $1236\text{ cm}^{-1}$  was attributed to the N-O antisymmetric stretching vibration of  $\text{NO}_2^-$ , signifying  $\text{NO}_2^-$  formation from the reduction of  $\text{NO}_3^-$ . With further negative shift in potential, an intermediate around  $1110\text{ cm}^{-1}$  was attributed to the N-O stretching vibration of hydroxylamine ( $\text{NH}_2\text{OH}$ ), a crucial intermediate for  $\text{NH}_3$  formation. The presence of the characteristic peak of the  $-\text{NH}_2$  wagging mode at  $1440\text{ cm}^{-1}$  confirmed the formation of  $\text{NH}_3$ <sup>15</sup>.

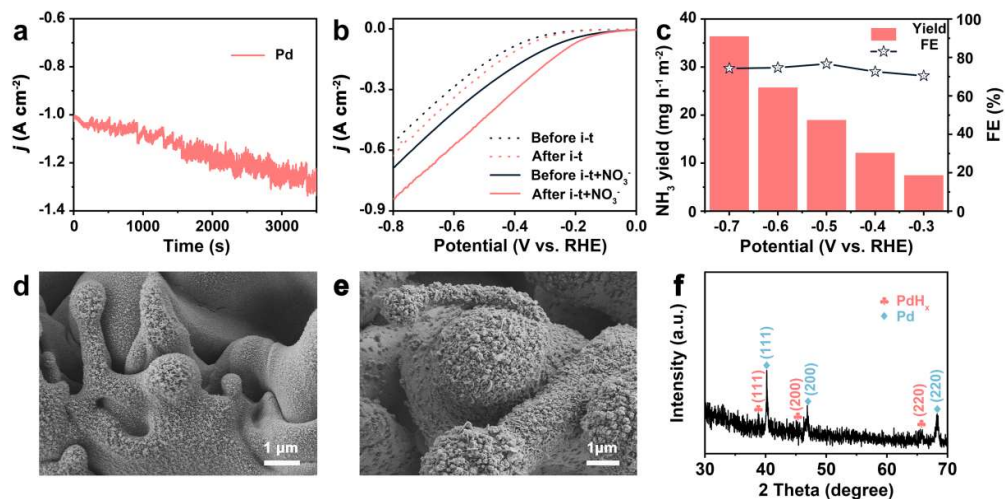

**Fig. S25** (a) i-t curves of cathodic electrochemically reconstructed at  $-1.0$  V vs. RHE (without iR compensation). (b) LSV curves (without iR compensation). (c) NH<sub>3</sub> yield and FE for Pd against various work potentials in 1 M KOH solution with 0.1 M NO<sub>3</sub><sup>-</sup> (without iR compensation). (d, e) SEM images of the Pd before and after cathodic electrochemical reconstruction. (f) XRD patterns.



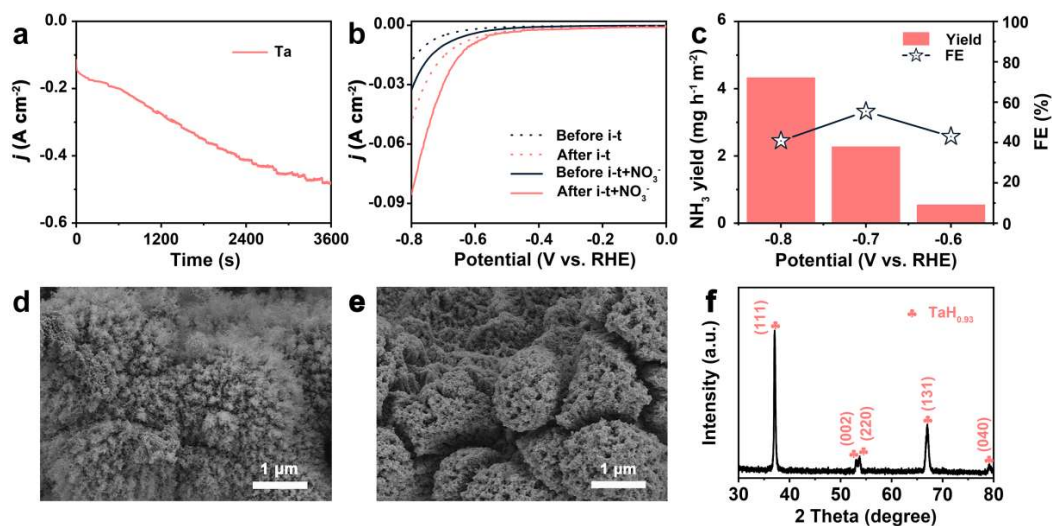

**Fig. S26** (a) i-t curves of cathodic electrochemically reconstructed at  $-0.9$  V vs. RHE (without iR compensation). (b) LSV curves (without iR compensation). (c) NH<sub>3</sub> yield and FE for Ta against various work potentials in 1 M KOH solution with 0.1 M NO<sub>3</sub><sup>-</sup> (without iR compensation). (d, e) SEM images of the Ta before and after cathodic electrochemical reconstruction. (f) XRD patterns.

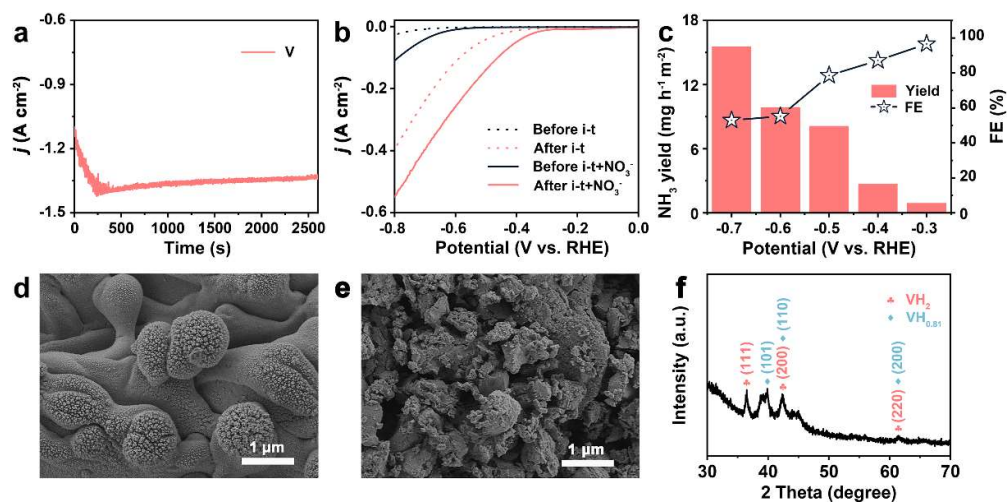

**Fig. S27** (a) i-t curves of cathodic electrochemically reconstructed at  $-1.3$  V vs. RHE (without iR compensation). (b) LSV curves (without iR compensation). (c) NH<sub>3</sub> yield and FE for V against various work potentials in 1 M KOH solution with 0.1 M NO<sub>3</sub><sup>-</sup> (without iR compensation). (d, e) SEM images of the V before and after cathodic electrochemical reconstruction. (f) XRD patterns.

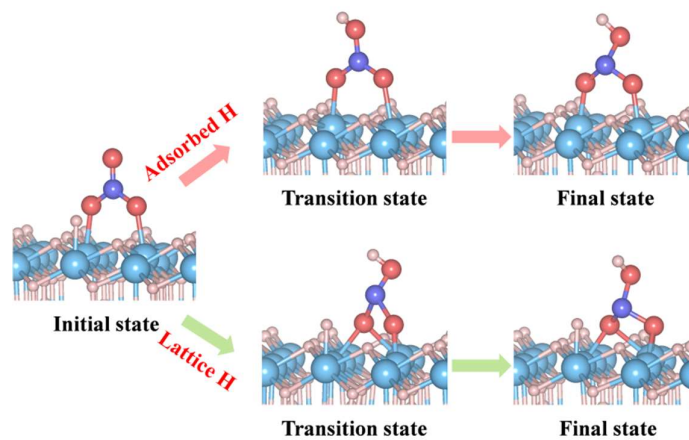

**Fig. S28** The configurations of initial state, transition state, and final state for the nitrate hydrogenation through adsorbed H (derived from water splitting) or lattice H (derived from  $\text{TiH}_{1.97}$ ). The light blue, purple, red and pink spheres represent Ti, N, O, and H atoms, respectively.

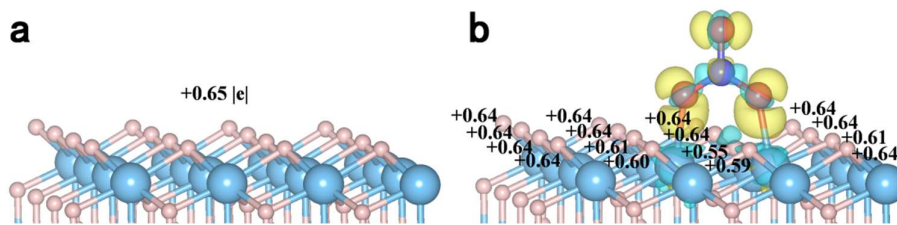

**Fig. S29** Calculated Bader charge of surface H **(a)** before and **(b)** after the adsorption of  $\text{NO}_3^-$ . The yellow section and the blue section represent the charge accumulate and lose region, respectively. The light blue, purple, red and pink spheres represent Ti, N, O, and H atoms, respectively.

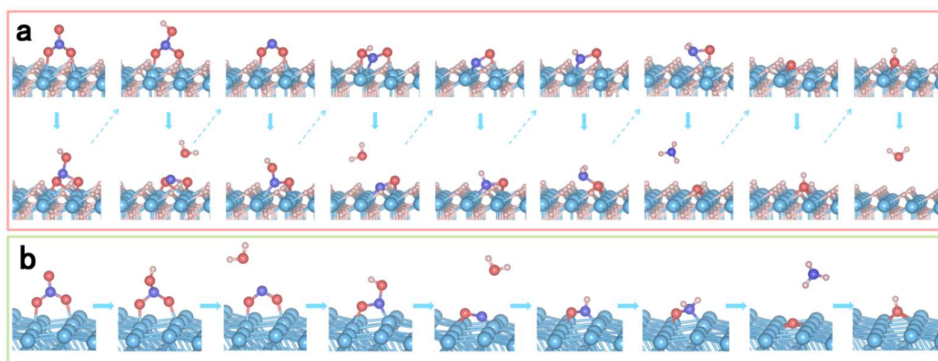

**Fig. S30** Adsorption configurations of reaction intermediates during NIRR on **(a)**  $\text{TiH}_{1.97}$  and **(b)** Ti. The light blue, purple, red and pink spheres represent Ti, N, O, and H atoms, respectively.

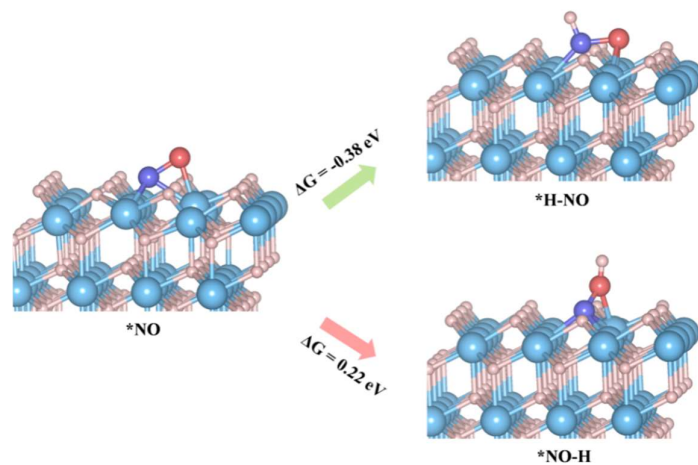

**Fig. S31** Calculated reaction free energy from \*NO to \*NO-H and \*H-NO. The light blue, purple, red and pink spheres represent Ti, N, O, and H atoms, respectively.

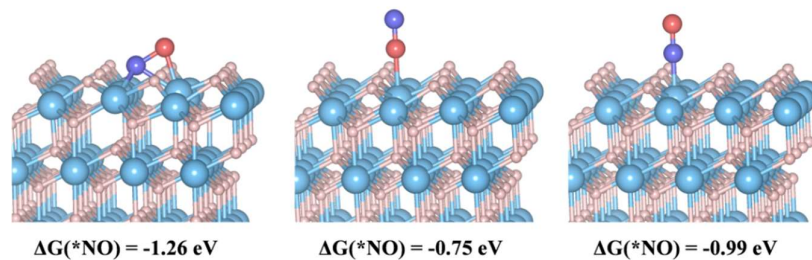

**Fig. S32** Different adsorption configurations and corresponding adsorption free energies of NO on  $\text{TiH}_{1.97}$ . The light blue, purple, red and pink spheres represent Ti, N, O, and H atoms, respectively.

**Note:** As shown in Fig. S31, it could be found that the reaction free energy from \*NO to \*NO-H (0.22 eV) was higher than that from \*NO to \*H-NO (-0.38 eV), indicating the priority of N-terminal of NO during hydrogenation process. In addition, the different adsorption configurations of NO on  $\text{TiH}_{1.97}$  were tested, as shown in Fig. S32. By comparing the adsorption free energy of NO, we could conclude that NO tends to adsorb on  $\text{TiH}_{1.97}$  in a lying mode with  $\Delta G (*NO)$  of -1.26 eV.

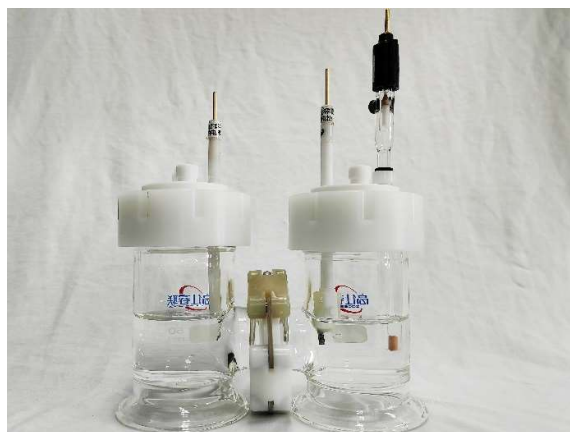

**Fig. S33** The digital images of H-type electrolytic cell.



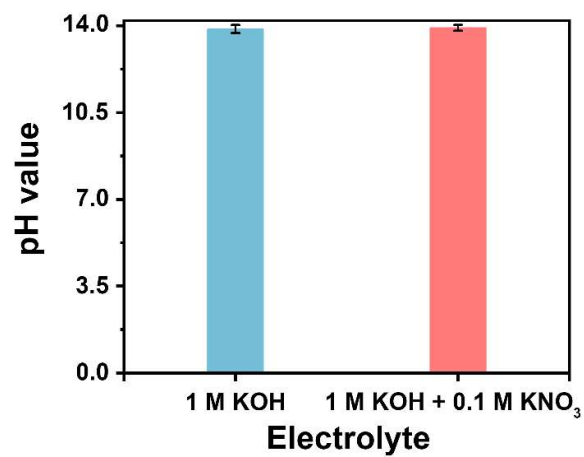

**Fig. S34** pH value of the electrolyte. Error bars indicate there lative standard deviations of the mean (n=3).

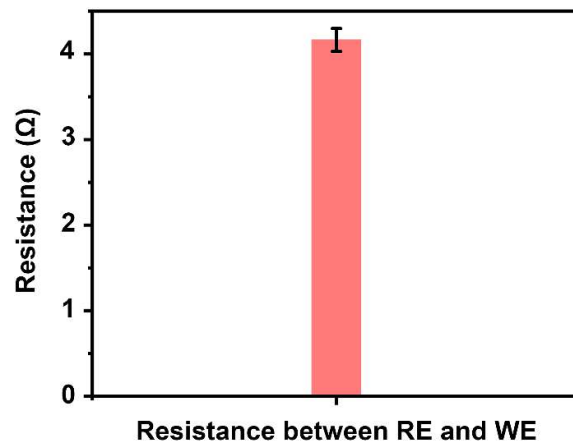

**Fig. S35** Resistance of the electrochemical cell in between RE and WE during the constant potential test. Error bars indicate there lative standard deviations of the mean (n=3).

## Supplementary Tables

**Table S1. Data obtained by fitting Nyquist plots.**

| <b>Sample</b>                                     | <b>R<sub>s</sub>(ohm)</b> | <b>R<sub>p</sub>(ohm)</b> | <b>CPE<sub>1</sub>(F cm<sup>-2</sup>)</b> | <b>R<sub>ct</sub>(ohm)</b> | <b>CPE<sub>2</sub>(F cm<sup>-2</sup>)</b> |
|---------------------------------------------------|---------------------------|---------------------------|-------------------------------------------|----------------------------|-------------------------------------------|
| TiH <sub>1.97</sub> +NO <sub>3</sub> <sup>-</sup> | 1.55                      | 0.23                      | 0.993                                     | 0.82                       | 1.028                                     |
| TiH <sub>1.97</sub>                               | 1.803                     | 0.07                      | 1.115                                     | 4.751                      | 0.865                                     |
| Ti+NO <sub>3</sub> <sup>-</sup>                   | 1.998                     | 0.252                     | 1.084                                     | 1.759                      | 1.047                                     |
| Ti                                                | 2.13                      | 0.174                     | 1.047                                     | 19.97                      | 0.823                                     |

**Table S2.** Structural parameters of Ti, TiH<sub>1.97</sub> and TiH<sub>2</sub> extracted from the EXAFS fitting.

| Sample              | Scattering path | CN | R(Å) | $\sigma^2/\text{Å}^2$ | R factor |
|---------------------|-----------------|----|------|-----------------------|----------|
| TiH <sub>1.97</sub> | Ti-Ti1.1        | 12 | 3.13 | 0.006                 | 0.011    |
| TiH <sub>2</sub>    | Ti-Ti1.1        | 12 | 3.14 | 0.004                 | 0.005    |
| Ti fiol             | Ti-Ti1.1        | 6  | 2.90 | 0.012                 | 0.013    |

The  $S_0^2$  was fixed as 0.7. The interatomic distances (R) and coordination numbers (CN). The CN was the coordination number; R was the half path length of the path, for a single scattering path, it was the inter-atomic distance.  $\sigma^2$  was the mean square variation in path length, this parameter encapsulates both static and thermal disorder.  $\Delta E_0$  was an adjustment to the  $E_0$  used to evaluate the wavenumber of the theory, it is useful to think of  $\Delta E$  as the parameter which aligns the energy grids of the data and the theory. R factor was used to indicate the accuracy of the fitting. The fitted ranges for k and R spaces were selected to be  $k=3-12.4 \text{ Å}^{-1}$  with  $R=1.5-3.5 \text{ Å}$  ( $k^3$ -weighted).

**Table S3.** The comparison of the NH<sub>3</sub> yield and FE with the reported catalysts for NIRR by the area of electrode and ECSA.

| Catalyst                                                                 | FE (%) | Yield <sub>NH<sub>3</sub></sub> (mg h <sup>-1</sup> cm <sup>-2</sup> ) | ECSA (cm <sup>2</sup> ) | ECSA-normalized NH <sub>3</sub> yields | Electrolyte                                     | Reduction Potential (vs. RHE) | Reference |
|--------------------------------------------------------------------------|--------|------------------------------------------------------------------------|-------------------------|----------------------------------------|-------------------------------------------------|-------------------------------|-----------|
| TiH <sub>1.97</sub>                                                      | 99.1   | <b>83.6</b>                                                            | 115                     | <b>0.72</b>                            | 1 M KOH +<br>0.1 M KNO <sub>3</sub>             | -0.70 V                       | This work |
| Cu <sub>x</sub> S-CO <sub>0.5</sub>                                      | 95.6   | <b>2.3</b>                                                             | 243                     | <b>0.01</b>                            | 1 M KOH +<br>0.1 M KNO <sub>3</sub>             | -0.40 V                       | 16        |
| o-CoP/C@<br>Cu <sub>3</sub> P/CF                                         | 90.3   | <b>26.7</b>                                                            | 1603                    | <b>0.01</b>                            | 1 M KOH +<br>0.1 M KNO <sub>3</sub>             | -0.25 V                       | 17        |
| (Cu <sub>0.6</sub> Co <sub>0.4</sub> )<br>Co <sub>2</sub> O <sub>4</sub> | 96.5   | <b>18.5</b>                                                            | /                       | /                                      | 1 M KOH +<br>0.1 M NO <sub>3</sub> <sup>-</sup> | -0.45 V                       | 18        |
| CuO NWAs<br>@Fe <sub>3</sub> O <sub>4</sub>                              | 97.5   | <b>28.7</b>                                                            | 147                     | <b>0.19</b>                            | 1 M KOH +<br>0.1 M KNO <sub>3</sub>             | -0.27 V                       | 19        |
| RuO <sub>x</sub> /Pd                                                     | 98.6   | <b>23.5</b>                                                            | 92                      | <b>0.24</b>                            | 1 M KOH +<br>0.1 M KNO <sub>3</sub>             | -0.50 V                       | 20        |
| CNs@CoP                                                                  | 98.3   | <b>40.4</b>                                                            | /                       | /                                      | 1 M KOH +<br>0.1 M NaNO <sub>3</sub>            | -0.60 V                       | 21        |
| Cu <sub>50</sub> Ni <sub>50</sub>                                        | 90.0   | <b>7.1</b>                                                             | 312                     | <b>0.02</b>                            | 1 M KOH<br>0.1 M KNO <sub>3</sub>               | -0.15 V                       | 22        |
| FeB <sub>2</sub>                                                         | 96.8   | <b>25.5</b>                                                            | 123                     | <b>0.20</b>                            | 1 M KOH +<br>0.1 M KNO <sub>3</sub>             | -0.60 V                       | 23        |
| Cu@C                                                                     | 99.3   | <b>25.3</b>                                                            | 587                     | <b>0.04</b>                            | 1 M KOH +<br>0.1 M KNO <sub>3</sub>             | -0.70 V                       | 24        |
| CuFe-450                                                                 | 95.1   | <b>14.1</b>                                                            | /                       | /                                      | 1 M KOH +<br>0.1 M KNO <sub>3</sub>             | -0.30 V                       | 25        |

**Table S4.** The comparison of the NH<sub>3</sub> yield and FE with the reported catalysts for NIRr by the weight of catalyst.

| Catalyst                 | FE (%)      | Yield <sub>NH<sub>3</sub></sub><br>(mg h <sup>-1</sup> mg <sub>cat</sub> <sup>-1</sup> ) | Electrolyte                                     | Reduction<br>Potential<br>(vs. RHE) | Reference |
|--------------------------|-------------|------------------------------------------------------------------------------------------|-------------------------------------------------|-------------------------------------|-----------|
| TiH <sub>1.97</sub>      | <b>99.1</b> | <b>139.3</b>                                                                             | 1 M KOH +<br>0.1 M KNO <sub>3</sub>             | -0.70 V                             | This work |
| AuCu <sub>3</sub> @Au    | <b>86.5</b> | <b>134.3</b>                                                                             | 1 M KOH +<br>0.5 M NO <sub>3</sub> <sup>-</sup> | -0.75 V                             | 26        |
| Bi-Cl <sub>red</sub>     | <b>73.5</b> | <b>10.0</b>                                                                              | 1 M KOH +<br>0.1 M NO <sub>3</sub> <sup>-</sup> | -0.70 V                             | 27        |
| Cu/Cu <sub>x</sub> O/GDY | <b>96.1</b> | <b>18.7</b>                                                                              | 1 M KOH +<br>0.1 M NO <sub>3</sub> <sup>-</sup> | -0.70 V                             | 28        |
| Cu <sub>3</sub> N/GDY    | <b>84.5</b> | <b>18.4</b>                                                                              | 1 M KOH +<br>0.1 M KNO <sub>3</sub>             | -0.70 V                             | 29        |
| 2D Fe-cyano              | <b>82.3</b> | <b>53.5</b>                                                                              | 1 M KOH<br>0.1 M KNO <sub>3</sub>               | -0.60 V                             | 30        |

## Geometrical coordinates of model structures

The fractional coordinates of all the models in this manuscript are listed below (The cell parameters are shown at the beginning of the coordinates of each model, and are given in the unit of angstrom).

Ti(101)

|                     |                     |                     |
|---------------------|---------------------|---------------------|
| 10.4314664725790429 | -2.8498194856268833 | -0.0768779622810153 |
| -0.0166803521858506 | 11.3379161377095912 | 0.0017974789564654  |
| -0.1698463532651056 | 0.0037600665585584  | 26.7200057729027627 |

Ti

64

Selective dynamics

Direct

|                    |                    |                    |
|--------------------|--------------------|--------------------|
| 0.0659899999999993 | 0.0154339999999991 | 0.0657059999999987 |
| 0.1753882744338817 | 0.1678265344161589 | 0.1444294786868257 |
| 0.2972108884537795 | 0.0728435973188790 | 0.2295640445332805 |
| 0.4081624675553481 | 0.2256674186357692 | 0.3095293356456589 |
| 0.2968440000000001 | 0.1981469999999987 | 0.0508159999999975 |
| 0.4060960506130432 | 0.1009556161847060 | 0.1323097295622069 |
| 0.0291032698322626 | 0.0065376661865054 | 0.2177864304091265 |
| 0.1386650350906152 | 0.1590399585264097 | 0.2976103142667195 |
| 0.5659899999999993 | 0.0154339999999991 | 0.0657059999999987 |
| 0.6753645430721228 | 0.1678195353065752 | 0.1444344836291264 |

0.7972004195417257 0.0728413489072687 0.2295825188882551  
0.9081959480523664 0.2256781227634999 0.3095297198778511  
0.7968440000000001 0.1981469999999987 0.0508159999999975  
0.9061142724551446 0.1009592082140587 0.1323241292090252  
0.5290727853781260 0.0065301717686472 0.2177753335319663  
0.6386217190920472 0.1590261072242957 0.2976107899013476  
0.0659899999999993 0.2654339999999991 0.0657059999999987  
0.1753874217871217 0.4178269534267967 0.1444294959465834  
0.2972129482393236 0.3228437769537314 0.2295648743927270  
0.4081696380643718 0.4756662815969637 0.3095280840680039  
0.2968440000000001 0.4481469999999987 0.0508159999999975  
0.4060952357647203 0.3509545367566929 0.1323077550595340  
0.0291029890563429 0.2565377518266220 0.2177879159481941  
0.1386647559114752 0.4090380618986014 0.2976115698951521  
0.5659899999999993 0.2654339999999991 0.0657059999999987  
0.6753634481997719 0.4178186558522883 0.1444341413615123  
0.7972027366323258 0.3228407838930245 0.2295830309504623  
0.9082001968391301 0.4756792211617145 0.3095302249989040  
0.7968440000000001 0.4481469999999987 0.0508159999999975  
0.9061126945777317 0.3509590167266472 0.1323220241337688  
0.5290753871532758 0.2565299807675750 0.2177779765692665  
0.6386187053877572 0.4090237521754186 0.2976103537273901



0.065989999999993 0.515433999999991 0.0657059999999987  
0.1753933875732685 0.6678293432144145 0.1444279672656130  
0.2972083604839114 0.5728405404697380 0.2295659107859490  
0.4081684683092975 0.7256642294982686 0.3095318725749728  
0.296844000000001 0.6981469999999987 0.0508159999999975  
0.4060954210757104 0.6009522048219141 0.1323091584969938  
0.0291018002594874 0.5065369109110717 0.2177887279896432  
0.1386640035791839 0.6590379279109878 0.2976150479631096  
0.565989999999993 0.515433999999991 0.0657059999999987  
0.6753668464932472 0.6678220167940258 0.1444335367741927  
0.7971953495749551 0.5728353937896790 0.2295823706990058  
0.9081965384002830 0.7256734961902320 0.3095331936144327  
0.796844000000001 0.6981469999999987 0.0508159999999975  
0.9061140183423044 0.6009561262957062 0.1323231791651972  
0.5290712566976924 0.5065271204755653 0.2177783042660499  
0.6386170406241142 0.6590235778677503 0.2976127500089768  
0.065989999999993 0.765433999999991 0.0657059999999987  
0.1753944917022584 0.9178298106179643 0.1444280330899840  
0.2972044706314446 0.8228389085736708 0.2295648094641252  
0.4081634757189476 0.9756630874042416 0.3095312074911820  
0.296844000000001 0.9481469999999987 0.0508159999999975  
0.4060989557539990 0.8509535186577960 0.1323109190373978

|                    |                    |                    |
|--------------------|--------------------|--------------------|
| 0.0291012949491383 | 0.7565354345754238 | 0.2177875629587963 |
| 0.1386641241755602 | 0.9090401593503729 | 0.2976134053267718 |
| 0.5659899999999993 | 0.7654339999999991 | 0.0657059999999987 |
| 0.6753667454850237 | 0.9178190947485994 | 0.1444328346352961 |
| 0.7971926087395153 | 0.8228347836170710 | 0.2295815671230298 |
| 0.9081920410486743 | 0.9756744878254594 | 0.3095325390910299 |
| 0.7968440000000001 | 0.9481469999999987 | 0.0508159999999975 |
| 0.9061151476814179 | 0.8509564420374890 | 0.1323252386872790 |
| 0.5290712373735174 | 0.7565287889622669 | 0.2177764917676430 |
| 0.6386207749769335 | 0.9090275700033296 | 0.2976132642914052 |

TiH<sub>1.97</sub>(111)

|                     |                     |                     |
|---------------------|---------------------|---------------------|
| 10.1930449999999997 | -5.9205470000000000 | 0.0221310000000000  |
| 0.0000000000000000  | 11.7965789999999995 | -0.0158720000000000 |
| 0.0000000000000000  | 0.0000000000000000  | 27.2903899999999986 |

H    Ti

96    48

Selective dynamics

Direct

|                    |                    |                    |
|--------------------|--------------------|--------------------|
| 0.0705460000000002 | 0.3465610000000012 | 0.0195900000000009 |
| 0.0705460000000002 | 0.8465610000000012 | 0.0195900000000009 |
| 0.5705460000000002 | 0.3465610000000012 | 0.0195900000000009 |

|                    |                    |                    |
|--------------------|--------------------|--------------------|
| 0.5705460000000002 | 0.8465610000000012 | 0.0195900000000009 |
| 0.4037973730641831 | 0.0132679332543363 | 0.1240625484983642 |
| 0.4037973662868792 | 0.5132679331579505 | 0.1240625517712606 |
| 0.9037973712717723 | 0.0132679333530412 | 0.1240625524068027 |
| 0.9037973821489759 | 0.5132679346967804 | 0.1240625471825813 |
| 0.2371271793657306 | 0.1799691484121072 | 0.2250741615878554 |
| 0.2371271783927762 | 0.6799691491862792 | 0.2250741623697517 |
| 0.7371271748569733 | 0.1799691455555109 | 0.2250741618485901 |
| 0.7371271833170469 | 0.6799691489821034 | 0.2250741610776703 |
| 0.4867330000000010 | 0.4300550000000030 | 0.0814719999999980 |
| 0.4867330000000010 | 0.9300550000000030 | 0.0814719999999980 |
| 0.9867330000000010 | 0.4300550000000030 | 0.0814719999999980 |
| 0.9867330000000010 | 0.9300550000000030 | 0.0814719999999980 |
| 0.3200765091183229 | 0.0967381568605703 | 0.1824955164313367 |
| 0.3200765100683871 | 0.5967381506070932 | 0.1824955155057124 |
| 0.8200765117596915 | 0.0967381504943532 | 0.1824955148789288 |
| 0.8200765152920347 | 0.5967381599058882 | 0.1824955177489752 |
| 0.1533241358977681 | 0.2634581185399287 | 0.2869429519262829 |
| 0.1533241344967762 | 0.7634581202415357 | 0.2869429508678379 |
| 0.6533241323370576 | 0.2634581163110845 | 0.2869429511415093 |
| 0.6533241371957478 | 0.7634581221127108 | 0.2869429522670304 |
| 0.0705460000000002 | 0.0965610000000012 | 0.0195900000000009 |

|                    |                    |                    |
|--------------------|--------------------|--------------------|
| 0.0705460000000002 | 0.5965610000000012 | 0.0195900000000009 |
| 0.5705460000000002 | 0.0965610000000012 | 0.0195900000000009 |
| 0.5705460000000002 | 0.5965610000000012 | 0.0195900000000009 |
| 0.4037973730069088 | 0.2632679402566502 | 0.1240625515512706 |
| 0.4037973771015553 | 0.7632679415984529 | 0.1240625513643570 |
| 0.9037973812497945 | 0.2632679468096161 | 0.1240625513322623 |
| 0.9037973817637485 | 0.7632679480748099 | 0.1240625522960703 |
| 0.2371271667086438 | 0.4299691314880146 | 0.2250741619774803 |
| 0.2371271621056261 | 0.9299691279555931 | 0.2250741637006383 |
| 0.7371271637354009 | 0.4299691306410211 | 0.2250741639875584 |
| 0.7371271677614509 | 0.9299691333168203 | 0.2250741608172170 |
| 0.4867330000000010 | 0.1800550000000030 | 0.0814719999999980 |
| 0.4867330000000010 | 0.6800550000000030 | 0.0814719999999980 |
| 0.9867330000000010 | 0.1800550000000030 | 0.0814719999999980 |
| 0.9867330000000010 | 0.6800550000000030 | 0.0814719999999980 |
| 0.3200765106929122 | 0.3467381620587471 | 0.1824955180237874 |
| 0.3200765155040332 | 0.8467381619842447 | 0.1824955191519916 |
| 0.8200765246405270 | 0.3467381640510864 | 0.1824955182780433 |
| 0.8200765188591365 | 0.8467381696091213 | 0.1824955169270850 |
| 0.1533241252303786 | 0.0134580917176403 | 0.2869429516649895 |
| 0.1533241275384368 | 0.5134580977285848 | 0.2869429520773121 |
| 0.6533241277722287 | 0.0134580998607679 | 0.2869429517581253 |

|                    |                    |                    |
|--------------------|--------------------|--------------------|
| 0.6533241290276272 | 0.5134580914913904 | 0.2869429523011494 |
| 0.3205450000000027 | 0.0965610000000012 | 0.0195900000000009 |
| 0.3205450000000027 | 0.5965610000000012 | 0.0195900000000009 |
| 0.8205450000000027 | 0.0965610000000012 | 0.0195900000000009 |
| 0.8205450000000027 | 0.5965610000000012 | 0.0195900000000009 |
| 0.1537973667622064 | 0.2632679395897629 | 0.1240625519840692 |
| 0.1537973660267594 | 0.7632679354274751 | 0.1240625494681939 |
| 0.6537973612681443 | 0.2632679297183489 | 0.1240625504965761 |
| 0.6537973633504961 | 0.7632679419595664 | 0.1240625536582469 |
| 0.4871271730225562 | 0.4299691242548633 | 0.2250741611917909 |
| 0.4871271735511871 | 0.9299691351582149 | 0.2250741614969958 |
| 0.9871271772374396 | 0.4299691347049595 | 0.2250741599522312 |
| 0.9871271802672230 | 0.9299691310503759 | 0.2250741605948621 |
| 0.2367330000000010 | 0.1800550000000030 | 0.0814719999999980 |
| 0.2367330000000010 | 0.6800550000000030 | 0.0814719999999980 |
| 0.7367330000000010 | 0.1800550000000030 | 0.0814719999999980 |
| 0.7367330000000010 | 0.6800550000000030 | 0.0814719999999980 |
| 0.0700765054438812 | 0.3467381595559961 | 0.1824955178224106 |
| 0.0700765013756204 | 0.8467381588068664 | 0.1824955209927803 |
| 0.5700764974112502 | 0.3467381543244744 | 0.1824955219491169 |
| 0.5700765072426166 | 0.8467381580296656 | 0.1824955171550423 |
| 0.4033241349977250 | 0.0134581017025733 | 0.2869429518359984 |

|                    |                    |                    |
|--------------------|--------------------|--------------------|
| 0.4033241276442404 | 0.5134581006968776 | 0.2869429526277278 |
| 0.9033241323114632 | 0.0134581038860497 | 0.2869429529866572 |
| 0.9033241347397630 | 0.5134581037356759 | 0.2869429526140973 |
| 0.3205450000000027 | 0.3465610000000012 | 0.0195900000000009 |
| 0.3205450000000027 | 0.8465599999999966 | 0.0195900000000009 |
| 0.8205450000000027 | 0.3465610000000012 | 0.0195900000000009 |
| 0.8205450000000027 | 0.8465599999999966 | 0.0195900000000009 |
| 0.1537973577188794 | 0.0132679292995357 | 0.1240625471947831 |
| 0.1537973588414595 | 0.5132679242262208 | 0.1240625493247605 |
| 0.6537973614069162 | 0.0132679243802763 | 0.1240625485109559 |
| 0.6537973567734786 | 0.5132679287519974 | 0.1240625463722657 |
| 0.4871271850969848 | 0.1799691546205131 | 0.2250741622268690 |
| 0.4871271777264267 | 0.6799691538113720 | 0.2250741593064227 |
| 0.9871271829964607 | 0.1799691546978415 | 0.2250741604956313 |
| 0.9871271865453765 | 0.6799691578089684 | 0.2250741625193874 |
| 0.2367330000000010 | 0.4300550000000030 | 0.0814719999999980 |
| 0.2367330000000010 | 0.9300550000000030 | 0.0814719999999980 |
| 0.7367330000000010 | 0.4300550000000030 | 0.0814719999999980 |
| 0.7367330000000010 | 0.9300550000000030 | 0.0814719999999980 |
| 0.0700764991661143 | 0.0967381475744177 | 0.1824955143073898 |
| 0.0700764972424342 | 0.5967381433707597 | 0.1824955156084360 |
| 0.5700764987436814 | 0.0967381477435481 | 0.1824955168025285 |

|                    |                    |                    |
|--------------------|--------------------|--------------------|
| 0.5700764962640080 | 0.5967381488818855 | 0.1824955142625755 |
| 0.4033241470415045 | 0.2634581223171322 | 0.2869429510789804 |
| 0.4033241428055427 | 0.7634581185392760 | 0.2869429508373848 |
| 0.9033241454595291 | 0.2634581186788887 | 0.2869429517386012 |
| 0.9033241500001237 | 0.7634581216042498 | 0.2869429517765429 |
| 0.403638999999983  | 0.2633080000000021 | 0.0542870000000022 |
| 0.403638999999983  | 0.7633080000000021 | 0.0542870000000022 |
| 0.903638999999983  | 0.2633080000000021 | 0.0542870000000022 |
| 0.903638999999983  | 0.7633080000000021 | 0.0542870000000022 |
| 0.2369387155614366 | 0.4300029937437586 | 0.1532774145735026 |
| 0.2369387874250068 | 0.9300029618825217 | 0.1532774070556027 |
| 0.7369388971343347 | 0.4300030087550806 | 0.1532774047967755 |
| 0.7369388508884887 | 0.9300030916921670 | 0.1532774151218799 |
| 0.0702279412553343 | 0.0967160521191031 | 0.2522567141789921 |
| 0.0702279324302170 | 0.5967160371830332 | 0.2522567491272981 |
| 0.5702279334513940 | 0.0967160414931771 | 0.2522567463341462 |
| 0.5702279200985864 | 0.5967160350703207 | 0.2522567312670181 |
| 0.403638999999983  | 0.0133080000000021 | 0.0542870000000022 |
| 0.403638999999983  | 0.5133080000000021 | 0.0542870000000022 |
| 0.903638999999983  | 0.0133080000000021 | 0.0542870000000022 |
| 0.903638999999983  | 0.5133080000000021 | 0.0542870000000022 |
| 0.2369387809491137 | 0.1800029983814461 | 0.1532774167052289 |

|                    |                    |                    |
|--------------------|--------------------|--------------------|
| 0.2369387293644310 | 0.6800029658183383 | 0.1532774080590995 |
| 0.7369388742314898 | 0.1800030554010293 | 0.1532774075101773 |
| 0.7369388941762661 | 0.6800030381331866 | 0.1532774070587276 |
| 0.0702279258256140 | 0.3467160572556076 | 0.2522567324606705 |
| 0.0702279503988458 | 0.8467160308722830 | 0.2522567196197305 |
| 0.5702279335517206 | 0.3467160189480015 | 0.2522567339783961 |
| 0.5702279207280065 | 0.8467160709430498 | 0.2522567360460351 |
| 0.1536389999999983 | 0.0133080000000021 | 0.0542870000000022 |
| 0.1536389999999983 | 0.5133080000000021 | 0.0542870000000022 |
| 0.6536389999999983 | 0.0133080000000021 | 0.0542870000000022 |
| 0.6536389999999983 | 0.5133080000000021 | 0.0542870000000022 |
| 0.4869388204384464 | 0.1800029762987099 | 0.1532774108540299 |
| 0.4869387491113046 | 0.6800030185839452 | 0.1532774030508984 |
| 0.9869388355094549 | 0.1800030920646287 | 0.1532774093451676 |
| 0.9869388657150185 | 0.6800029877732585 | 0.1532774107779568 |
| 0.3202279223008422 | 0.3467160391014216 | 0.2522567286805544 |
| 0.3202279262975067 | 0.8467160358994235 | 0.2522567398945007 |
| 0.8202279534784397 | 0.3467160501775234 | 0.2522567396614581 |
| 0.8202279557335328 | 0.8467160662166029 | 0.2522567230672317 |
| 0.1536389999999983 | 0.2633080000000021 | 0.0542870000000022 |
| 0.1536389999999983 | 0.7633080000000021 | 0.0542870000000022 |
| 0.6536389999999983 | 0.2633080000000021 | 0.0542870000000022 |



|                    |                    |                    |
|--------------------|--------------------|--------------------|
| 0.653638999999983  | 0.763308000000021  | 0.054287000000022  |
| 0.4869387749206365 | 0.4300029536330112 | 0.1532774125073662 |
| 0.4869388013591360 | 0.9300030293479690 | 0.1532774078046721 |
| 0.9869388581507802 | 0.4300030388012578 | 0.1532774067453610 |
| 0.9869388590525533 | 0.9300030257115144 | 0.1532774107754805 |
| 0.3202279377292173 | 0.0967160368610137 | 0.2522567297277105 |
| 0.3202279053144166 | 0.5967160410966115 | 0.2522567441936456 |
| 0.8202279323307091 | 0.0967160623379376 | 0.2522567359099399 |
| 0.8202279691440931 | 0.5967160390886004 | 0.2522567371834609 |

#### Ti(101)-H

|                     |                     |                     |
|---------------------|---------------------|---------------------|
| 10.3841267536841411 | -2.8576068351851118 | -0.1464140441106770 |
| -0.0005686340597545 | 11.3067771504924810 | 0.0030753216658324  |
| -0.0029841504721516 | -0.0008952147430414 | 26.9040727632061518 |

H Ti

1 64

#### Selective dynamics

##### Direct

|                    |                    |                    |
|--------------------|--------------------|--------------------|
| 0.5777251496599519 | 0.5188093257664327 | 0.3441776037113592 |
| 0.0659899999999993 | 0.0154339999999991 | 0.0657059999999987 |
| 0.1750200472899324 | 0.1677481063171287 | 0.1440675582937431 |
| 0.2967810845122383 | 0.0728022216015600 | 0.2287165605780378 |

0.4075402284008403 0.2250213286479562 0.3073460376296416  
0.2968440000000001 0.1981469999999987 0.0508159999999975  
0.4060150865414087 0.1007561476948328 0.1316766281091224  
0.0286073468342777 0.0064045874915921 0.2169936331632047  
0.1375802429649469 0.1590297166410465 0.2964378726844926  
0.5659899999999993 0.0154339999999991 0.0657059999999987  
0.6750665669746237 0.1673912598961938 0.1441946736369973  
0.7963715327101619 0.0727079459573128 0.2288187800255974  
0.9067046442391059 0.2255559649153914 0.3084950553209737  
0.7968440000000001 0.1981469999999987 0.0508159999999975  
0.9055900833430873 0.1009340548779932 0.1318449697483116  
0.5280159248409312 0.0060465946260651 0.217310098877278  
0.6383113855416936 0.1587694143530024 0.2962741103405243  
0.0659899999999993 0.2654339999999991 0.0657059999999987  
0.1748275862041107 0.4177800588227527 0.1440742525704961  
0.2962488239316677 0.3226237831349483 0.2290129821065297  
0.4091060758749053 0.4764384814233529 0.3103600462085043  
0.2968440000000001 0.4481469999999987 0.0508159999999975  
0.4057668702909656 0.3512001175947853 0.1316699306355485  
0.0283955881804230 0.2565822589316472 0.2169353492985557  
0.1357761266714347 0.4086406470303525 0.2965022756245613  
0.5659899999999993 0.2654339999999991 0.0657059999999987

0.6753209595276458 0.4179645231286698 0.1437086527589150  
0.7971895025817263 0.3227664043040462 0.2286514176553675  
0.9054246810509993 0.4750541024601335 0.3078022838948438  
0.7968440000000001 0.4481469999999987 0.0508159999999975  
0.9064821978985209 0.3509013311951568 0.1317214218015343  
0.5292850017492126 0.2575104896251407 0.2161844656627212  
0.6348077056059084 0.4109974903807357 0.2978248800094244  
0.0659899999999993 0.5154339999999991 0.0657059999999987  
0.1745251557646639 0.6678469216307544 0.1441168656049392  
0.2954694985252136 0.5729165773748411 0.2289985821365324  
0.4076449817930446 0.7262992805718982 0.3073055192511581  
0.2968440000000001 0.6981469999999987 0.0508159999999975  
0.4056800842402406 0.6007271188483138 0.1316881711742762  
0.0273908854669019 0.5066932118555101 0.2168499164464870  
0.1378865057248128 0.6588325276706322 0.2966922464678072  
0.5659899999999993 0.5154339999999991 0.0657059999999987  
0.6750163685667641 0.6676543495703759 0.1436511968785751  
0.7930428081974412 0.5718399144800755 0.2287024418034204  
0.9055791960326240 0.7249062092925648 0.3079328365306906  
0.7968440000000001 0.6981469999999987 0.0508159999999975  
0.9061553614386092 0.6011053380247051 0.1318367861492556  
0.5265042942113290 0.5061926744552655 0.2168566527532763

|                    |                    |                    |
|--------------------|--------------------|--------------------|
| 0.6352366787710189 | 0.6554277009355726 | 0.2979135761978146 |
| 0.0659899999999993 | 0.7654339999999991 | 0.0657059999999987 |
| 0.1750332697483218 | 0.9177396594062289 | 0.1441453944493826 |
| 0.2961217736264506 | 0.8226128173447347 | 0.2287711662375790 |
| 0.4069789987188769 | 0.9751624596188460 | 0.3089385069071289 |
| 0.2968440000000001 | 0.9481469999999987 | 0.0508159999999975 |
| 0.4060476370490612 | 0.8511538401868152 | 0.1317426718239839 |
| 0.0277164037639121 | 0.7556106152541023 | 0.2170387246702393 |
| 0.1365733869305838 | 0.9085146600899918 | 0.2964399296171636 |
| 0.5659899999999993 | 0.7654339999999991 | 0.0657059999999987 |
| 0.6749389489426046 | 0.9180814339547474 | 0.1441164310363668 |
| 0.7974814778818413 | 0.8230371695868887 | 0.2285752441021869 |
| 0.9067521758424865 | 0.9750583864959702 | 0.3085923747049011 |
| 0.7968440000000001 | 0.9481469999999987 | 0.0508159999999975 |
| 0.9063238912118268 | 0.8512839273867400 | 0.1316124946576703 |
| 0.5293809761095160 | 0.7556649346889412 | 0.2162630651825941 |
| 0.6385949137940502 | 0.9093383059757015 | 0.2963568953533730 |

TiH<sub>1.97</sub>(111)-H

|                     |                     |                     |
|---------------------|---------------------|---------------------|
| 10.1930359999999993 | -5.9205420000000002 | 0.0221310000000000  |
| 0.0000000000000000  | 11.7965890000000009 | -0.0158720000000000 |
| 0.0000000000000000  | 0.0000000000000000  | 27.2903899999999986 |

H Ti

97 48

Selective dynamics

Direct

|                    |                    |                    |
|--------------------|--------------------|--------------------|
| 0.0705460000000002 | 0.3465610000000012 | 0.0195900000000009 |
| 0.4037641193345765 | 0.0132635739467114 | 0.1239308376548757 |
| 0.2363397384000438 | 0.1788198143916681 | 0.2244046671594599 |
| 0.4867330000000010 | 0.4300550000000030 | 0.0814719999999980 |
| 0.3199658565063230 | 0.0965874024629623 | 0.1820000969018314 |
| 0.1529547622469571 | 0.2635239791770166 | 0.2860054832548229 |
| 0.0705460000000002 | 0.0965599999999966 | 0.0195900000000009 |
| 0.4038399724901435 | 0.2634445057086453 | 0.1241326881458476 |
| 0.2358122655069878 | 0.4294925813909268 | 0.2243273648591003 |
| 0.4867330000000010 | 0.1800550000000030 | 0.0814719999999980 |
| 0.3198524795267623 | 0.3466962297430148 | 0.1819067583661299 |
| 0.1532389630215674 | 0.0134017147822065 | 0.2863679200578870 |
| 0.3205450000000027 | 0.0965599999999966 | 0.0195900000000009 |
| 0.1537027816128883 | 0.2632011457768748 | 0.1239234829758059 |
| 0.4878896736341713 | 0.4320655555759951 | 0.2255986782564563 |
| 0.2367330000000010 | 0.1800539999999984 | 0.0814719999999980 |
| 0.0697541561286360 | 0.3466258677902796 | 0.1819522026200235 |
| 0.4032088176334055 | 0.0134139829955199 | 0.2863912804769786 |

|                    |                    |                    |
|--------------------|--------------------|--------------------|
| 0.3205450000000027 | 0.3465599999999966 | 0.0195900000000009 |
| 0.1537594639069073 | 0.0132519862485383 | 0.1239370098387857 |
| 0.4864533367568938 | 0.1789560858370872 | 0.2244220411923077 |
| 0.2367330000000010 | 0.4300550000000030 | 0.0814719999999980 |
| 0.0700664295701163 | 0.0966919387008905 | 0.1820414072641351 |
| 0.4027162014295205 | 0.2625509360271666 | 0.2855264739257357 |
| 0.5705460000000002 | 0.3465610000000012 | 0.0195900000000009 |
| 0.9038069783087322 | 0.0133044271228008 | 0.1239241186476213 |
| 0.7367364132439463 | 0.1800031734396107 | 0.2245127497823483 |
| 0.9867330000000010 | 0.4300550000000030 | 0.0814719999999980 |
| 0.8201324262788617 | 0.0969899330177749 | 0.1819624036807262 |
| 0.6533216212832397 | 0.2634714009616267 | 0.2860173513667708 |
| 0.5705460000000002 | 0.0965599999999966 | 0.0195900000000009 |
| 0.9037688697030629 | 0.2632546332531276 | 0.1239756308161501 |
| 0.7374178687915965 | 0.4295338140490807 | 0.2243477575144537 |
| 0.9867330000000010 | 0.1800550000000030 | 0.0814719999999980 |
| 0.8200931583800545 | 0.3466806555994966 | 0.1819657925333298 |
| 0.6533867126010713 | 0.0136366582851651 | 0.2860354238842948 |
| 0.8205460000000002 | 0.0965599999999966 | 0.0195900000000009 |
| 0.6537834602675842 | 0.2632783959873824 | 0.1239440306875138 |
| 0.9869430853521131 | 0.4302327952256095 | 0.2245046089116600 |
| 0.7367330000000010 | 0.1800539999999984 | 0.0814719999999980 |

|                    |                    |                    |
|--------------------|--------------------|--------------------|
| 0.5700530038113347 | 0.3467534515441246 | 0.1819046814273513 |
| 0.9030948834417805 | 0.0136531393390891 | 0.2860189100059240 |
| 0.8205460000000002 | 0.3465599999999966 | 0.0195900000000009 |
| 0.6537698693840013 | 0.0132748328571910 | 0.1239376357840899 |
| 0.9870053424647930 | 0.1799053039756184 | 0.2245511833548806 |
| 0.7367330000000010 | 0.4300550000000030 | 0.0814719999999980 |
| 0.5699580509945493 | 0.0967529177039755 | 0.1820151130088699 |
| 0.9031626941386249 | 0.2634618395248079 | 0.2863550335821341 |
| 0.0705460000000002 | 0.8465610000000012 | 0.0195900000000009 |
| 0.4036481923049691 | 0.5132291839745882 | 0.1241128962262543 |
| 0.2362915622845368 | 0.6806022344802611 | 0.2243534409340349 |
| 0.4867330000000010 | 0.9300550000000030 | 0.0814719999999980 |
| 0.3198356997955226 | 0.5966562049288451 | 0.1818639074282245 |
| 0.1532405878524621 | 0.7634698944325308 | 0.2863852123036181 |
| 0.0705460000000002 | 0.5965610000000012 | 0.0195900000000009 |
| 0.4038632784948646 | 0.7631806012365990 | 0.1241464968334264 |
| 0.2369908662228533 | 0.9299624560464752 | 0.2244665628749867 |
| 0.4867330000000010 | 0.6800539999999984 | 0.0814719999999980 |
| 0.3199475769961749 | 0.8468541576663037 | 0.1819997522932457 |
| 0.1529819723136744 | 0.5132674185732907 | 0.2860136124320330 |
| 0.3205450000000027 | 0.5965610000000012 | 0.0195900000000009 |
| 0.1537781738189183 | 0.7633033430122337 | 0.1239254567217852 |

0.4863978966813159 0.9306167171977472 0.2243767538375448  
0.2367330000000010 0.6800550000000030 0.0814719999999980  
0.0702069988162935 0.8468363486116269 0.1819957905759220  
0.3962838747836085 0.5101046892733954 0.2850246928010063  
0.3205450000000027 0.8465610000000012 0.0195900000000009  
0.1537456658394744 0.5132723031222066 0.1239346133234867  
0.4879362996097797 0.6789813511126248 0.2256238862367563  
0.2367330000000010 0.9300550000000030 0.0814719999999980  
0.0700207578299653 0.5968354093350120 0.1820032986391916  
0.4027434502187782 0.7638571155858883 0.2855949602414596  
0.5705460000000002 0.8465610000000012 0.0195900000000009  
0.9037521343531195 0.5132622411789060 0.1239427319558937  
0.7347914501554430 0.6789958349819585 0.2255997630811974  
0.9867330000000010 0.9300550000000030 0.0814719999999980  
0.8200371866954361 0.5967341402153337 0.1818957739127397  
0.6565176560248607 0.7701987356585585 0.2851398263902268  
0.5705460000000002 0.5965610000000012 0.0195900000000009  
0.9035691871374365 0.7631891648534299 0.1241301745785413  
0.7374301209280376 0.9310816701242067 0.2243489882356229  
0.9867330000000010 0.6800550000000030 0.0814719999999980  
0.8200546949908388 0.8468925652838487 0.1819254035385457  
0.6566177713092654 0.5101195247581173 0.2851360867906066



|                    |                    |                    |
|--------------------|--------------------|--------------------|
| 0.8205460000000002 | 0.5965610000000012 | 0.0195900000000009 |
| 0.6537942497025273 | 0.7633675397912191 | 0.1241121782883050 |
| 0.9880573920759426 | 0.9305573139568397 | 0.2244120725003672 |
| 0.7367330000000010 | 0.6800550000000030 | 0.0814719999999980 |
| 0.5701277982946668 | 0.8469095805954552 | 0.1818936125141015 |
| 0.9031841694318863 | 0.5133468336829472 | 0.2860143367415735 |
| 0.8205460000000002 | 0.8465610000000012 | 0.0195900000000009 |
| 0.6537500150867940 | 0.5132787059947072 | 0.1241443523360650 |
| 0.9879993264857919 | 0.6805260553636423 | 0.2244067114084480 |
| 0.7367330000000010 | 0.9300550000000030 | 0.0814719999999980 |
| 0.5699789760548508 | 0.5967599041279817 | 0.1809506429467929 |
| 0.9040687063191037 | 0.7638939309891302 | 0.2855370874063303 |
| 0.5689950705063868 | 0.5961398706496990 | 0.3212054074537178 |
| 0.4036389999999983 | 0.2633080000000021 | 0.0542870000000022 |
| 0.2367101243591893 | 0.4298550041841615 | 0.1530176653840883 |
| 0.0700836415153843 | 0.0966591121604712 | 0.2517927495367424 |
| 0.4036389999999983 | 0.0133080000000021 | 0.0542870000000022 |
| 0.2367932548173538 | 0.1798652449668144 | 0.1529618163354045 |
| 0.0691586238411406 | 0.3463837238104233 | 0.2515676889913308 |
| 0.1536389999999983 | 0.0133080000000021 | 0.0542870000000022 |
| 0.4868493399034267 | 0.1799165845950595 | 0.1529410578090656 |
| 0.3191096646499677 | 0.3456710431659681 | 0.2512946222997298 |

0.153638999999983 0.263308000000021 0.054287000000022  
0.4871088410090030 0.4305924959786420 0.1534029588368621  
0.3199105755028150 0.0964054606838538 0.2516220762424347  
0.903638999999983 0.263308000000021 0.054287000000022  
0.7368899933036702 0.4300123326674815 0.1530509231358083  
0.5699278784655192 0.0966539778495722 0.2517591155868181  
0.903638999999983 0.013308000000021 0.054287000000022  
0.7368109889912462 0.1799975599311692 0.1529567175476821  
0.5698118360291228 0.3457714869904968 0.2513110402193620  
0.653638999999983 0.013308000000021 0.054287000000022  
0.9869410521343147 0.1799344774169863 0.1529777657517110  
0.8203933555849053 0.3464154926316527 0.2516147462580015  
0.653638999999983 0.263308000000021 0.054287000000022  
0.9868944934118387 0.4300947478152495 0.1529522802961255  
0.8203926999762883 0.0975865285592485 0.2515766288383317  
0.403638999999983 0.763308000000021 0.054287000000022  
0.2368904807486683 0.9300425265925596 0.1530004631141915  
0.0701181496381806 0.5968887385914867 0.2517512097543584  
0.403638999999983 0.513308000000021 0.054287000000022  
0.2367993181328837 0.6800662955439509 0.1529555652098598  
0.0703910449366476 0.8468901823423463 0.2516183126969811  
0.153638999999983 0.513308000000021 0.054287000000022

|                    |                    |                    |
|--------------------|--------------------|--------------------|
| 0.4871784851786039 | 0.6797197541300948 | 0.1534128899553756 |
| 0.3199789882940288 | 0.8468268686556585 | 0.2516620446492437 |
| 0.1536389999999983 | 0.7633080000000021 | 0.0542870000000022 |
| 0.4868646155261721 | 0.9301021682024017 | 0.1529660412399685 |
| 0.3190598906474781 | 0.5970421458149270 | 0.2512693051581915 |
| 0.9036389999999983 | 0.7633080000000021 | 0.0542870000000022 |
| 0.7370311148457972 | 0.9301595106859860 | 0.1530283808697182 |
| 0.5700118464994235 | 0.5966654816854471 | 0.2576570623343303 |
| 0.9036389999999983 | 0.5133080000000021 | 0.0542870000000022 |
| 0.7363071227882712 | 0.6797907198912758 | 0.1533977815528337 |
| 0.5697515615549990 | 0.8476602510962827 | 0.2513083091784813 |
| 0.6536389999999983 | 0.5133080000000021 | 0.0542870000000022 |
| 0.9869960380639772 | 0.6800821057172782 | 0.1529345869386967 |
| 0.8210602536205029 | 0.8476031720461153 | 0.2513181634499588 |
| 0.6536389999999983 | 0.7633080000000021 | 0.0542870000000022 |
| 0.9870193608676922 | 0.9301005726593682 | 0.1529655638386557 |
| 0.8210393556300992 | 0.5970031778177458 | 0.2513016825930370 |

TiH<sub>1.97</sub>(111)-H-vacancy

|                     |                     |                     |
|---------------------|---------------------|---------------------|
| 10.1930449999999997 | -5.9205470000000000 | 0.0221310000000000  |
| 0.0000000000000000  | 11.7965789999999995 | -0.0158720000000000 |
| 0.0000000000000000  | 0.0000000000000000  | 27.2903899999999986 |

H Ti

95 48

Selective dynamics

Direct

|                    |                    |                    |
|--------------------|--------------------|--------------------|
| 0.0705460000000002 | 0.3465610000000012 | 0.0195900000000009 |
| 0.0705460000000002 | 0.8465610000000012 | 0.0195900000000009 |
| 0.5705460000000002 | 0.3465610000000012 | 0.0195900000000009 |
| 0.5705460000000002 | 0.8465610000000012 | 0.0195900000000009 |
| 0.4039409463441657 | 0.0133478751337591 | 0.1239805941324322 |
| 0.4037679142746602 | 0.5132872284301132 | 0.1240742114778097 |
| 0.9036934438684707 | 0.0133603549007856 | 0.1239777744207472 |
| 0.9037059364333346 | 0.5131117555456611 | 0.1239806775501883 |
| 0.2360303719621353 | 0.1781976233413999 | 0.2240639130098112 |
| 0.2359300398364512 | 0.6810865727101288 | 0.2240529275380295 |
| 0.7369637622616874 | 0.1800528642776430 | 0.2246546034767730 |
| 0.7387485998218881 | 0.6809510302461889 | 0.2240710125714259 |
| 0.4867330000000010 | 0.4300550000000030 | 0.0814719999999980 |
| 0.4867330000000010 | 0.9300550000000030 | 0.0814719999999980 |
| 0.9867330000000010 | 0.4300550000000030 | 0.0814719999999980 |
| 0.9867330000000010 | 0.9300550000000030 | 0.0814719999999980 |
| 0.3200592748675581 | 0.0965609699802765 | 0.1820973505837039 |
| 0.3196468832213117 | 0.5971533509741669 | 0.1820121752455357 |

|                    |                    |                    |
|--------------------|--------------------|--------------------|
| 0.8199906018493035 | 0.0968082758645288 | 0.1822117381158504 |
| 0.8202301826893910 | 0.5967400476784288 | 0.1820992617689921 |
| 0.1528189260011979 | 0.2624909336628092 | 0.2867672312643390 |
| 0.1529946932929649 | 0.7637039548883163 | 0.2863700474537274 |
| 0.6528555154207956 | 0.2638557151155234 | 0.2861901890755205 |
| 0.6541762865659879 | 0.7638747741430584 | 0.2867658684721864 |
| 0.0705460000000002 | 0.0965610000000012 | 0.0195900000000009 |
| 0.0705460000000002 | 0.5965610000000012 | 0.0195900000000009 |
| 0.5705460000000002 | 0.0965610000000012 | 0.0195900000000009 |
| 0.5705460000000002 | 0.5965610000000012 | 0.0195900000000009 |
| 0.4038589285647420 | 0.2633005555142314 | 0.1239891012800867 |
| 0.4038688439132965 | 0.7633605463328783 | 0.1239859320172793 |
| 0.9037888157346594 | 0.2632968461941187 | 0.1239971365079769 |
| 0.9041732128990705 | 0.7634683672807033 | 0.1238937386209369 |
| 0.2391393848238038 | 0.4311487970034366 | 0.2252763866284478 |
| 0.2367405888997537 | 0.9299592006427371 | 0.2244770067230570 |
| 0.7365380551579520 | 0.4298379351209347 | 0.2247827668629243 |
| 0.7365024752186807 | 0.9297722346677721 | 0.2248070860549589 |
| 0.4867330000000010 | 0.1800550000000030 | 0.0814719999999980 |
| 0.4867330000000010 | 0.6800550000000030 | 0.0814719999999980 |
| 0.9867330000000010 | 0.1800550000000030 | 0.0814719999999980 |
| 0.9867330000000010 | 0.6800550000000030 | 0.0814719999999980 |

0.3196593624346284 0.3460316103764086 0.1820404929588431  
0.3200628644217497 0.8469957183412571 0.1821190072343338  
0.8199900772458005 0.3467040763728836 0.1822152100083560  
0.8201988473416755 0.8469785340080854 0.1821047450288002  
0.1530831690804312 0.0132201635666206 0.2863497246746123  
0.1528437853085469 0.5142129307780536 0.2867563960710947  
0.6528324976766803 0.0127609799460494 0.2861631684798861  
0.6542006204327812 0.5140786188303567 0.2867543610975664  
0.3205450000000027 0.0965610000000012 0.0195900000000009  
0.3205450000000027 0.5965610000000012 0.0195900000000009  
0.8205450000000027 0.0965610000000012 0.0195900000000009  
0.8205450000000027 0.5965610000000012 0.0195900000000009  
0.1536945170510875 0.2632803646444503 0.1239951284082458  
0.1535929675919742 0.7634583462378264 0.1238845249777972  
0.6537582849360891 0.2632962070822003 0.1240008586518505  
0.6537717803377890 0.7633574281653396 0.1239951358979167  
0.4859496952768043 0.4310265478596088 0.2252399495481886  
0.4871050186475536 0.9297978576008920 0.2248073244612633  
0.9872223642439345 0.4298974766470935 0.2248093793941636  
0.9870423087664861 0.9299412765738868 0.2244765721406680  
0.2367330000000010 0.1800550000000030 0.0814719999999980  
0.2367330000000010 0.6800550000000030 0.0814719999999980

|                    |                    |                    |
|--------------------|--------------------|--------------------|
| 0.736733000000010  | 0.180055000000030  | 0.081471999999980  |
| 0.736733000000010  | 0.680055000000030  | 0.081471999999980  |
| 0.0703438001081223 | 0.3469187415697618 | 0.1822934476306569 |
| 0.0700314905522364 | 0.8467634615166160 | 0.1820452320714537 |
| 0.5698809098521110 | 0.3469221359496148 | 0.1822821366712695 |
| 0.5698821304481168 | 0.8464603908508417 | 0.1822920435068529 |
| 0.4034265961840682 | 0.0136836617493396 | 0.2865628454936989 |
| 0.9030801534399787 | 0.0136120058846651 | 0.2865286356511658 |
| 0.9030215837948099 | 0.5132870357324850 | 0.2865584407027610 |
| 0.3205450000000027 | 0.3465610000000012 | 0.0195900000000009 |
| 0.3205450000000027 | 0.8465599999999966 | 0.0195900000000009 |
| 0.8205450000000027 | 0.3465610000000012 | 0.0195900000000009 |
| 0.8205450000000027 | 0.8465599999999966 | 0.0195900000000009 |
| 0.1535821715315614 | 0.0128810008920583 | 0.1238935638913328 |
| 0.1536944176332619 | 0.5131868932249163 | 0.1239865938281251 |
| 0.6537573223226697 | 0.0132652673299982 | 0.1239969525502968 |
| 0.6537553300105480 | 0.5131993060132704 | 0.1239898081381333 |
| 0.4871705059359271 | 0.1804619146945780 | 0.2247815852520893 |
| 0.4858691665658560 | 0.6779078279078331 | 0.2252687606655076 |
| 0.9872384372625324 | 0.1805028875287230 | 0.2248063505854172 |
| 0.9870328890417980 | 0.6802539700047574 | 0.2244804741176996 |
| 0.2367330000000010 | 0.4300550000000030 | 0.081471999999980  |

|                    |                    |                    |
|--------------------|--------------------|--------------------|
| 0.236733000000010  | 0.930055000000030  | 0.081471999999980  |
| 0.736733000000010  | 0.430055000000030  | 0.081471999999980  |
| 0.736733000000010  | 0.930055000000030  | 0.081471999999980  |
| 0.0698174968339761 | 0.0965956215034640 | 0.1821020188528534 |
| 0.0698090298633269 | 0.5967361633289968 | 0.1821184389966360 |
| 0.5700962975945721 | 0.0968099354441257 | 0.1822154577685103 |
| 0.5707575731406686 | 0.5971354007660814 | 0.1820487250284523 |
| 0.4026054067600091 | 0.2624680710876957 | 0.2867495537760413 |
| 0.4024907818826433 | 0.7638682576085307 | 0.2867526150300810 |
| 0.9039601408005561 | 0.2638803408853406 | 0.2861587000070723 |
| 0.9034705161777737 | 0.7636114006192644 | 0.2863512451995872 |
| 0.403638999999983  | 0.263308000000021  | 0.054287000000022  |
| 0.403638999999983  | 0.763308000000021  | 0.054287000000022  |
| 0.903638999999983  | 0.263308000000021  | 0.054287000000022  |
| 0.903638999999983  | 0.763308000000021  | 0.054287000000022  |
| 0.2367998896671855 | 0.4299556786124379 | 0.1531841216683353 |
| 0.2369769410352834 | 0.9300291301217858 | 0.1529848187342325 |
| 0.7368833767196125 | 0.4299582512420888 | 0.1531130457451978 |
| 0.7368796207183211 | 0.9300943869373832 | 0.1531076565052052 |
| 0.0696867076884428 | 0.0962320300576818 | 0.2518287720346601 |
| 0.0696798397367117 | 0.5970026564203170 | 0.2518445243663416 |
| 0.5700840919219559 | 0.0968217200532521 | 0.2518258265365418 |



|                    |                    |                    |
|--------------------|--------------------|--------------------|
| 0.5732640716906606 | 0.5983322961888760 | 0.2515689081206943 |
| 0.4036389999999983 | 0.0133080000000021 | 0.0542870000000022 |
| 0.4036389999999983 | 0.5133080000000021 | 0.0542870000000022 |
| 0.9036389999999983 | 0.0133080000000021 | 0.0542870000000022 |
| 0.9036389999999983 | 0.5133080000000021 | 0.0542870000000022 |
| 0.2367078838842746 | 0.1795937278067214 | 0.1528699525256597 |
| 0.2366718475242680 | 0.6802506112651897 | 0.1528675097761429 |
| 0.7369037324760003 | 0.1800212724544335 | 0.1530908743200668 |
| 0.7373269625783715 | 0.6802178480288792 | 0.1528760368261228 |
| 0.0714797762307220 | 0.3475632830345934 | 0.2519918322930717 |
| 0.0700489200046913 | 0.8467963800664499 | 0.2517189947661037 |
| 0.5694122721622740 | 0.3474271338695556 | 0.2519756563850875 |
| 0.5693020089841068 | 0.8454018531135944 | 0.2519899002831893 |
| 0.1536389999999983 | 0.0133080000000021 | 0.0542870000000022 |
| 0.1536389999999983 | 0.5133080000000021 | 0.0542870000000022 |
| 0.6536389999999983 | 0.0133080000000021 | 0.0542870000000022 |
| 0.6536389999999983 | 0.5133080000000021 | 0.0542870000000022 |
| 0.4869687746654314 | 0.1800438924084580 | 0.1531125429811097 |
| 0.4869777933827494 | 0.6801299666718414 | 0.1531837545154714 |
| 0.9868347442376687 | 0.1800446332602519 | 0.1531075236457063 |
| 0.9868962828318498 | 0.6799522205251457 | 0.1529867728004452 |
| 0.3184833546147417 | 0.3435098675635758 | 0.2515581220475069 |

|                    |                    |                    |
|--------------------|--------------------|--------------------|
| 0.3198430903937302 | 0.8471779482188569 | 0.2518462525618972 |
| 0.8200367497925329 | 0.3467723861941334 | 0.2518247327106394 |
| 0.8205935869860899 | 0.8471424622429740 | 0.2518309548873806 |
| 0.1536389999999983 | 0.2633080000000021 | 0.0542870000000022 |
| 0.1536389999999983 | 0.7633080000000021 | 0.0542870000000022 |
| 0.6536389999999983 | 0.2633080000000021 | 0.0542870000000022 |
| 0.6536389999999983 | 0.7633080000000021 | 0.0542870000000022 |
| 0.4869482274965357 | 0.4299875168138312 | 0.1531850978924699 |
| 0.4870105132881059 | 0.9300911925622293 | 0.1531243374504824 |
| 0.9868396512813359 | 0.4299194103900654 | 0.1531249142082179 |
| 0.9868630518455057 | 0.9300660970241829 | 0.1530006062525567 |
| 0.3199101771381398 | 0.0962803277243858 | 0.2518105851270409 |
| 0.3183219868235795 | 0.5985429837551568 | 0.2514786320407560 |
| 0.8200500798710584 | 0.0967996420032150 | 0.2517994460208255 |
| 0.8205418914663341 | 0.5969370594379486 | 0.2518105288796687 |

Ti(101)-NO<sub>3</sub>

|                     |                     |                     |
|---------------------|---------------------|---------------------|
| 10.4025979999999993 | -2.8696869999999999 | -0.1615660000000000 |
| 0.0000000000000000  | 11.3235840000000003 | 0.0117790000000000  |
| 0.0000000000000000  | 0.0000000000000000  | 26.8160300000000014 |

N O Ti

1 3 64

## Selective dynamics

### Direct

|                    |                    |                    |
|--------------------|--------------------|--------------------|
| 0.2532083527212687 | 0.4523274120736410 | 0.4083609247154667 |
| 0.3656558190655096 | 0.4847031006440879 | 0.3861780498558475 |
| 0.1519136751940315 | 0.4185039462045071 | 0.3790876837176845 |
| 0.2447791522147149 | 0.4555394717468136 | 0.4538443509253804 |
| 0.0659899999999993 | 0.0154339999999991 | 0.0657059999999987 |
| 0.1753859907753688 | 0.1679416886600077 | 0.1445641946551884 |
| 0.2960203942574126 | 0.0724420744234476 | 0.2285155234637888 |
| 0.4090946594290857 | 0.2230134128129720 | 0.3081589203085082 |
| 0.2968440000000001 | 0.1981469999999987 | 0.0508159999999975 |
| 0.4055537011122105 | 0.1004989934368579 | 0.1314887261409808 |
| 0.0271841732327243 | 0.0051787192853560 | 0.2161853024968309 |
| 0.1362646685035748 | 0.1550972834571141 | 0.2957115417991948 |
| 0.5659899999999993 | 0.0154339999999991 | 0.0657059999999987 |
| 0.6746915372609086 | 0.1676012807874848 | 0.1439377411612584 |
| 0.7966933033216889 | 0.0728562640719407 | 0.2286074977459169 |
| 0.9039183555456709 | 0.2235907190813356 | 0.3084410505124422 |
| 0.7968440000000001 | 0.1981469999999987 | 0.0508159999999975 |
| 0.9057812063273233 | 0.1014731930555012 | 0.1317552565405911 |
| 0.5272741748677587 | 0.0056699474219447 | 0.2170686661980646 |
| 0.6369639463361163 | 0.1579333779244775 | 0.2957714488339382 |

0.065989999999993 0.265433999999991 0.0657059999999987  
0.1762540180254077 0.4179640370430729 0.1447037192109070  
0.2960473462405405 0.3229611767803364 0.2312271121072550  
0.4099658467042564 0.4759050034455158 0.3138805460739335  
0.296844000000001 0.4481469999999987 0.0508159999999975  
0.4054405445311875 0.3505827795135830 0.1322218823881507  
0.0294824939452021 0.2565577646833663 0.2174465625644560  
0.1328801314357838 0.4072545948358623 0.3035123392943120  
0.565989999999993 0.265433999999991 0.0657059999999987  
0.6743605900308363 0.4178862979790344 0.1439420805118860  
0.7983540767349174 0.3225371627364063 0.2281451866401383  
0.9041366149784709 0.4753286105511773 0.3082312818845651  
0.796844000000001 0.4481469999999987 0.0508159999999975  
0.9062345003112580 0.3509397309899968 0.1316801321007534  
0.5281456591997840 0.2567238976066642 0.2163687271809674  
0.6376751971359210 0.4079272547722402 0.2952546803641960  
0.065989999999993 0.515433999999991 0.0657059999999987  
0.1755708718813882 0.6675125921500997 0.1446275696468688  
0.2960409532568152 0.5711002642991100 0.2312399451391047  
0.4094047288075410 0.7270887334438302 0.3087698961157936  
0.296844000000001 0.6981469999999987 0.0508159999999975  
0.4055999366937937 0.6008327827930364 0.1321870170937624

0.0295103405542727 0.5060977722426705 0.2174042544076124  
0.1363161347890077 0.6619287896076302 0.2954118314270657  
0.5659899999999993 0.5154339999999991 0.0657059999999987  
0.6747521082491433 0.6669795778930757 0.1440496268439873  
0.7957856249237233 0.5715581658733051 0.2282914646826976  
0.9064219065388733 0.7249506320222890 0.3083863190296816  
0.7968440000000001 0.6981469999999987 0.0508159999999975  
0.9060282085875970 0.6002446902289422 0.1317764148161349  
0.5251746992162031 0.5054156783874364 0.2172209222758026  
0.6380243366802435 0.6587260200738545 0.2954096157180884  
0.0659899999999993 0.7654339999999991 0.0657059999999987  
0.1751883845740370 0.9175751453714689 0.1438686180551131  
0.2957718965850420 0.8219623603940894 0.2284977103355419  
0.4062771458436338 0.9739434419237685 0.3089934070080074  
0.2968440000000001 0.9481469999999987 0.0508159999999975  
0.4058084154418926 0.8511740176909096 0.1315174163860880  
0.0268743295966866 0.7564867670951746 0.2160392680121046  
0.1357106727387451 0.9078781501807679 0.2955991944186073  
0.5659899999999993 0.7654339999999991 0.0657059999999987  
0.6751206603563537 0.9179238864576325 0.1440284698005589  
0.7962223129814211 0.8227325075034766 0.2283989914293205  
0.9062793969400876 0.9743328665935829 0.3085632758895677

0.7968440000000001 0.9481469999999987 0.0508159999999975  
0.9052431266086446 0.8507820190891449 0.1314782947870362  
0.5275116162451797 0.7554167691700752 0.2164345611930916  
0.6370998843453309 0.9083195057771669 0.2962596080024964

Ti(101)-NO<sub>3</sub>H

10.4025979999999993 -2.8696869999999999 -0.1615660000000000  
0.0000000000000000 11.3235840000000003 0.0117790000000000  
0.0000000000000000 0.0000000000000000 26.8160300000000014

H N O Ti  
1 1 3 64

Selective dynamics

Direct

0.2319857466907342 0.4293585527854539 0.4731765917463610  
0.2291511664498431 0.4749691625483308 0.4050894517091037  
0.3432749119169261 0.4731613975491535 0.3805879807072350  
0.1260634062873080 0.4275257722617308 0.3714463738959207  
0.2122840686221772 0.3798712567672668 0.4427503395983632  
0.0659899999999993 0.0154339999999991 0.0657059999999987  
0.1759836069201464 0.1667625024020339 0.1444398119330018  
0.2968787625198061 0.0692428064195046 0.2284802549445023  
0.4104049385522687 0.2188304254312313 0.3090928477175799

|                    |                    |                    |
|--------------------|--------------------|--------------------|
| 0.296844000000001  | 0.1981469999999987 | 0.0508159999999975 |
| 0.4062729046252495 | 0.1004749641550246 | 0.1316176601214307 |
| 0.0276961243239854 | 0.0033832211083062 | 0.2158231477399359 |
| 0.1375582814314632 | 0.1514023216573439 | 0.2958754610939519 |
| 0.5659899999999993 | 0.0154339999999991 | 0.0657059999999987 |
| 0.6754151568304946 | 0.1667679613004082 | 0.1444110878266599 |
| 0.7951881619430718 | 0.0687874455069291 | 0.2281529912390858 |
| 0.9031472381913913 | 0.2153768880021055 | 0.3084737325331570 |
| 0.7968440000000001 | 0.1981469999999987 | 0.0508159999999975 |
| 0.9060290687495812 | 0.1007722854507234 | 0.1315098948901203 |
| 0.5272328253985376 | 0.0033409267973929 | 0.2171614578360463 |
| 0.6375046570920428 | 0.1546645601594082 | 0.2958046299326870 |
| 0.0659899999999993 | 0.2654339999999991 | 0.0657059999999987 |
| 0.1762877152026673 | 0.4165775473169481 | 0.1452735244247037 |
| 0.2967353725404367 | 0.3190235379611938 | 0.2312448414424305 |
| 0.4042445925197417 | 0.4712415961586953 | 0.3154934985392574 |
| 0.2968440000000001 | 0.4481469999999987 | 0.0508159999999975 |
| 0.4060018252375024 | 0.3502762472871825 | 0.1324882891669183 |
| 0.0292095351000646 | 0.2526625344687200 | 0.2171024482741520 |
| 0.1303046857350385 | 0.4033195862034283 | 0.3010306624108123 |
| 0.5659899999999993 | 0.2654339999999991 | 0.0657059999999987 |
| 0.6746439211952341 | 0.4165545138041742 | 0.1442440130257532 |

0.8004237753161872 0.3203403112268403 0.2294187260835795  
0.9032325705613424 0.4738055222451173 0.3085702974166855  
0.7968440000000001 0.4481469999999987 0.0508159999999975  
0.9063932011972187 0.3505315163435027 0.1317628954485329  
0.5298622106957749 0.2553622477240490 0.2170337327033918  
0.6369529361366717 0.4044078334622424 0.2960164594262320  
0.0659899999999993 0.5154339999999991 0.0657059999999987  
0.1757872012735678 0.6660132684162980 0.1444289573672798  
0.2973678636512050 0.5691403194082947 0.2310877850283409  
0.4106401200152245 0.7237633501640920 0.3092155763181422  
0.2968440000000001 0.6981469999999987 0.0508159999999975  
0.4058218025248860 0.6000242328676230 0.1321648975140029  
0.0293452344774228 0.5066643222836803 0.2176853285482550  
0.1373430673102043 0.6613704733304774 0.2964552748236835  
0.5659899999999993 0.5154339999999991 0.0657059999999987  
0.6746995252128661 0.6650201829814111 0.1440164639168290  
0.7935680066466786 0.5679094101180430 0.2285235421683257  
0.9058359205896819 0.7207709381136059 0.3078444124480244  
0.7968440000000001 0.6981469999999987 0.0508159999999975  
0.9058445838087927 0.5996685371415753 0.1319002842546684  
0.5245209098556448 0.5030702512614922 0.2182681883694851  
0.6372593190989011 0.6564598638078166 0.2958497650015698



|                    |                    |                    |
|--------------------|--------------------|--------------------|
| 0.065989999999993  | 0.765433999999991  | 0.065705999999987  |
| 0.1757227883960396 | 0.9162459454940528 | 0.1440084539836583 |
| 0.2954927393913092 | 0.8184611267882821 | 0.2285464135674731 |
| 0.4062705909542859 | 0.9694986160286733 | 0.3090074538794872 |
| 0.2968440000000001 | 0.948146999999987  | 0.050815999999975  |
| 0.4058210000695253 | 0.8503117745881140 | 0.1315323817097701 |
| 0.0269596070992296 | 0.7546800397368224 | 0.2161288707264046 |
| 0.1369915818624464 | 0.9054386109306829 | 0.2950729259240766 |
| 0.565989999999993  | 0.765433999999991  | 0.065705999999987  |
| 0.6749833610790882 | 0.9163892375911080 | 0.1438461784284389 |
| 0.7959241910523361 | 0.8192858294143673 | 0.2282535967247053 |
| 0.9068689572464458 | 0.9705607388165328 | 0.3078062183900416 |
| 0.7968440000000001 | 0.948146999999987  | 0.050815999999975  |
| 0.9054154765261315 | 0.8501376874086052 | 0.1314904444510688 |
| 0.5283420814467705 | 0.7537281122958890 | 0.2165937257713570 |
| 0.6377074303265259 | 0.9056676009409869 | 0.2965348310625978 |

Ti(101)-NO<sub>2</sub>

|                    |                    |                    |
|--------------------|--------------------|--------------------|
| 10.402597999999993 | -2.869686999999999 | -0.161566000000000 |
| 0.000000000000000  | 11.323584000000003 | 0.011779000000000  |
| 0.000000000000000  | 0.000000000000000  | 26.816030000000014 |

N O Ti

## Selective dynamics

## Direct

|                    |                    |                    |
|--------------------|--------------------|--------------------|
| 0.2492759385898451 | 0.4599319445928822 | 0.4064093601657708 |
| 0.3591131490584086 | 0.4860739239479401 | 0.3820923693077375 |
| 0.1521085825077195 | 0.4274801501292010 | 0.3748227293411275 |
| 0.0659899999999993 | 0.0154339999999991 | 0.0657059999999987 |
| 0.1754045853047921 | 0.1678653870307617 | 0.1444458390518008 |
| 0.2966505654875519 | 0.0718442914528052 | 0.2285929124869556 |
| 0.4091417802332192 | 0.2225082202345368 | 0.3087673670473494 |
| 0.2968440000000001 | 0.1981469999999987 | 0.0508159999999975 |
| 0.4055830629176716 | 0.1009833114289487 | 0.1314723838153747 |
| 0.0276355262518394 | 0.0048156890709637 | 0.2160981971824170 |
| 0.1357716804747792 | 0.1547582421537480 | 0.2960100555813105 |
| 0.5659899999999993 | 0.0154339999999991 | 0.0657059999999987 |
| 0.6749748952228299 | 0.1677246964392526 | 0.1440022369129096 |
| 0.7966004106248308 | 0.0721105715077546 | 0.2284133635042341 |
| 0.9035231827667877 | 0.2218060854781257 | 0.3089632758796085 |
| 0.7968440000000001 | 0.1981469999999987 | 0.0508159999999975 |
| 0.9058732392516670 | 0.1013192412207641 | 0.1316830901764570 |
| 0.5273821691237331 | 0.0052779885062974 | 0.2166217709601823 |
| 0.6369546448070631 | 0.1571647017703905 | 0.2955421572609092 |

0.065989999999993 0.265433999999991 0.0657059999999987  
0.1762184868620308 0.4177900282144498 0.1450179337009744  
0.2963526485295199 0.3215143852130031 0.2308026177541316  
0.4098137011784164 0.4746630046961182 0.3131669942530177  
0.296844000000001 0.4481469999999987 0.0508159999999975  
0.4055423058971707 0.3504734834184910 0.1321937747360812  
0.0288386349205498 0.2550889659540784 0.2174095179304096  
0.1317550789603769 0.4068642885553376 0.3020819465876983  
0.565989999999993 0.265433999999991 0.0657059999999987  
0.6748271623707561 0.4180204721607259 0.1440675513652054  
0.7994394311556573 0.3223092037841989 0.2286635610058923  
0.9041928261424524 0.4758075607203585 0.3089143028203641  
0.796844000000001 0.4481469999999987 0.0508159999999975  
0.9063209834852903 0.3508038881137210 0.1316922289662882  
0.5284881400803063 0.2567669066493978 0.2166379252988780  
0.6385112945778714 0.4065781671135917 0.2952085217495769  
0.065989999999993 0.515433999999991 0.0657059999999987  
0.1758747549481085 0.6670173586338313 0.1443999636790667  
0.2959032001156360 0.5710286186951726 0.2307500324314110  
0.4097212302441861 0.7244710969296115 0.3096077614169345  
0.296844000000001 0.6981469999999987 0.0508159999999975  
0.4058015889365135 0.6007154371120955 0.1322083750630788

|                    |                    |                    |
|--------------------|--------------------|--------------------|
| 0.0286039339458903 | 0.5069085217581563 | 0.2174102255486635 |
| 0.1355824805596947 | 0.6616212439075148 | 0.2963022977572154 |
| 0.5659899999999993 | 0.5154339999999991 | 0.0657059999999987 |
| 0.6750041071654079 | 0.6667211289005768 | 0.1439908431296390 |
| 0.7957836013564540 | 0.5713935386606248 | 0.2280085336240287 |
| 0.9068607263761322 | 0.7245983918185024 | 0.3079785487194239 |
| 0.7968440000000001 | 0.6981469999999987 | 0.0508159999999975 |
| 0.9062248605654694 | 0.6002146980594110 | 0.1315452958066241 |
| 0.5248670748661823 | 0.5052706701521809 | 0.2170410678801290 |
| 0.6388322502822196 | 0.6589810070242248 | 0.2953728623743585 |
| 0.0659899999999993 | 0.7654339999999991 | 0.0657059999999987 |
| 0.1757887835992484 | 0.9173512057861418 | 0.1439050511690731 |
| 0.2959935669595159 | 0.8210174845617890 | 0.2288193493621164 |
| 0.4066232886704338 | 0.9727666316821495 | 0.3086754756922395 |
| 0.2968440000000001 | 0.9481469999999987 | 0.0508159999999975 |
| 0.4061134673090536 | 0.8508748691440248 | 0.1315176576485895 |
| 0.0273480778252635 | 0.7563466065724289 | 0.2157336894635925 |
| 0.1366246692107144 | 0.9079011554943810 | 0.2953135526961308 |
| 0.5659899999999993 | 0.7654339999999991 | 0.0657059999999987 |
| 0.6749610580597751 | 0.9174828853914886 | 0.1439248805276776 |
| 0.7962286604641778 | 0.8224655867407690 | 0.2282268243109914 |
| 0.9062371625239676 | 0.9737825999592921 | 0.3083066460673710 |

0.7968440000000001 0.9481469999999987 0.0508159999999975  
0.9054165832359249 0.8508375510392179 0.1314282675705914  
0.5273460513543943 0.7549594007559269 0.2166760884643862  
0.6367590473735313 0.9076475106346514 0.2960992782916482

Ti(101)-NO<sub>2</sub>H

10.4025979999999993 -2.8696869999999999 -0.1615660000000000  
0.0000000000000000 11.3235840000000003 0.0117790000000000  
0.0000000000000000 0.0000000000000000 26.8160300000000014

H N O Ti  
1 1 2 64

Selective dynamics

Direct

0.2865010000000012 0.4375190000000018 0.4455540000000013  
0.3418610000000015 0.4533720000000017 0.3769720000000021  
0.2113790000000009 0.4377569999999977 0.3678979999999967  
0.3605319999999992 0.4882800000000032 0.4276740000000032  
0.0659899999999993 0.0154339999999991 0.0657059999999987  
0.1759160000000008 0.1676689999999965 0.1445750000000032  
0.2957159999999988 0.0723300000000009 0.2296830000000014  
0.4137970000000024 0.2283499999999989 0.3094600000000014  
0.2968440000000001 0.1981469999999987 0.0508159999999975

|                    |                    |                    |
|--------------------|--------------------|--------------------|
| 0.4051240000000007 | 0.1003499999999988 | 0.1314700000000002 |
| 0.0289720000000031 | 0.0054659999999984 | 0.2178979999999981 |
| 0.1412899999999979 | 0.1574239999999989 | 0.2974350000000001 |
| 0.5659899999999993 | 0.0154339999999991 | 0.0657059999999987 |
| 0.6754480000000029 | 0.1670349999999985 | 0.1434670000000011 |
| 0.7958270000000027 | 0.0705209999999994 | 0.2282500000000027 |
| 0.9087949999999978 | 0.2221219999999988 | 0.3076160000000030 |
| 0.7968440000000001 | 0.1981469999999987 | 0.0508159999999975 |
| 0.9070239999999998 | 0.1011600000000001 | 0.1321209999999979 |
| 0.5265190000000004 | 0.0023259999999965 | 0.2158579999999972 |
| 0.6387369999999990 | 0.1511599999999973 | 0.2949210000000022 |
| 0.0659899999999993 | 0.2654339999999991 | 0.0657059999999987 |
| 0.1761199999999974 | 0.4173309999999972 | 0.1445739999999986 |
| 0.3001069999999970 | 0.3205540000000013 | 0.2315759999999969 |
| 0.4089870000000033 | 0.4816920000000025 | 0.3208339999999978 |
| 0.2968440000000001 | 0.4481469999999987 | 0.0508159999999975 |
| 0.4066499999999991 | 0.3515790000000010 | 0.1323080000000019 |
| 0.0330489999999983 | 0.2553100000000015 | 0.2173590000000019 |
| 0.1376009999999965 | 0.4088849999999979 | 0.3019940000000005 |
| 0.5659899999999993 | 0.2654339999999991 | 0.0657059999999987 |
| 0.6745099999999979 | 0.4184339999999978 | 0.1461200000000034 |
| 0.8024449999999987 | 0.3200720000000032 | 0.2277940000000029 |

|                    |                    |                    |
|--------------------|--------------------|--------------------|
| 0.908768999999995  | 0.474097000000004  | 0.3093379999999968 |
| 0.7968440000000001 | 0.4481469999999987 | 0.0508159999999975 |
| 0.9062550000000016 | 0.3506399999999985 | 0.1313189999999977 |
| 0.5305650000000028 | 0.2508499999999998 | 0.2158810000000031 |
| 0.6431210000000007 | 0.3996029999999990 | 0.2936240000000012 |
| 0.0659899999999993 | 0.5154339999999991 | 0.0657059999999987 |
| 0.1749310000000008 | 0.6670280000000020 | 0.1440610000000007 |
| 0.2944430000000011 | 0.5727619999999973 | 0.2292059999999978 |
| 0.4066940000000017 | 0.7248069999999984 | 0.3071709999999968 |
| 0.2968440000000001 | 0.6981469999999987 | 0.0508159999999975 |
| 0.4065760000000012 | 0.5997559999999993 | 0.1317370000000011 |
| 0.0283220000000028 | 0.5062479999999994 | 0.2166750000000022 |
| 0.1377740000000003 | 0.6559859999999986 | 0.2965689999999981 |
| 0.5659899999999993 | 0.5154339999999991 | 0.0657059999999987 |
| 0.6745730000000023 | 0.6655659999999983 | 0.1445250000000016 |
| 0.7960380000000029 | 0.5727720000000005 | 0.2295599999999993 |
| 0.9090630000000033 | 0.7276710000000008 | 0.3075260000000029 |
| 0.7968440000000001 | 0.6981469999999987 | 0.0508159999999975 |
| 0.9044960000000017 | 0.5999839999999992 | 0.1319739999999996 |
| 0.5233160000000012 | 0.5063719999999989 | 0.2215569999999971 |
| 0.6367690000000010 | 0.6606409999999983 | 0.2978400000000008 |
| 0.0659899999999993 | 0.7654339999999991 | 0.0657059999999987 |

|                   |                   |                   |
|-------------------|-------------------|-------------------|
| 0.174923999999972 | 0.917805000000013 | 0.144390999999988 |
| 0.294918000000027 | 0.822020999999994 | 0.228619999999994 |
| 0.406512999999968 | 0.975754000000020 | 0.308050999999990 |
| 0.296844000000001 | 0.948146999999987 | 0.050815999999975 |
| 0.405253000000019 | 0.850152999999988 | 0.131414999999970 |
| 0.028514000000013 | 0.755040999999985 | 0.216461000000025 |
| 0.137073000000009 | 0.907237999999995 | 0.296920000000030 |
| 0.565989999999993 | 0.765433999999991 | 0.065705999999987 |
| 0.675736999999980 | 0.916860999999973 | 0.143569999999969 |
| 0.796723999999975 | 0.821886999999967 | 0.228628000000005 |
| 0.905773000000035 | 0.974487000000034 | 0.309339999999988 |
| 0.796844000000001 | 0.948146999999987 | 0.050815999999975 |
| 0.906165999999989 | 0.850704999999978 | 0.131616999999985 |
| 0.528519000000028 | 0.755549999999995 | 0.215857999999972 |
| 0.637385000000019 | 0.906171999999980 | 0.295504000000011 |

Ti(101)-NO

|                    |                    |                    |
|--------------------|--------------------|--------------------|
| 10.402597999999993 | -2.869686999999999 | -0.161566000000000 |
| 0.000000000000000  | 11.323584000000003 | 0.011779000000000  |
| 0.000000000000000  | 0.000000000000000  | 26.816030000000014 |

N O Ti

1 1 64



## Selective dynamics

### Direct

|                    |                    |                    |
|--------------------|--------------------|--------------------|
| 0.3185160000000025 | 0.5136400000000023 | 0.3437249999999992 |
| 0.1891820000000024 | 0.5343840000000029 | 0.3485500000000030 |
| 0.0659899999999993 | 0.0154339999999991 | 0.0657059999999987 |
| 0.1753679999999989 | 0.1674250000000015 | 0.1445310000000006 |
| 0.2946779999999976 | 0.0715620000000001 | 0.2288649999999990 |
| 0.4020439999999965 | 0.2192509999999999 | 0.3097319999999968 |
| 0.2968440000000001 | 0.1981469999999987 | 0.0508159999999975 |
| 0.4059629999999999 | 0.1005800000000008 | 0.1317599999999999 |
| 0.0265470000000008 | 0.0043340000000001 | 0.2169930000000022 |
| 0.1360060000000018 | 0.1562720000000013 | 0.2959660000000000 |
| 0.5659899999999993 | 0.0154339999999991 | 0.0657059999999987 |
| 0.6752269999999996 | 0.1668639999999968 | 0.1442639999999997 |
| 0.7960119999999975 | 0.0722239999999985 | 0.2293009999999995 |
| 0.9078760000000017 | 0.2235289999999992 | 0.3078730000000007 |
| 0.7968440000000001 | 0.1981469999999987 | 0.0508159999999975 |
| 0.9058890000000019 | 0.1004220000000018 | 0.1316539999999975 |
| 0.5283129999999971 | 0.0036229999999975 | 0.2170899999999989 |
| 0.6356830000000002 | 0.1548820000000006 | 0.2981639999999999 |
| 0.0659899999999993 | 0.2654339999999991 | 0.0657059999999987 |
| 0.1746130000000008 | 0.4177830000000000 | 0.1444949999999992 |

0.2987219999999979 0.3210649999999973 0.2312879999999993  
0.4087839999999971 0.4810829999999982 0.3160069999999990  
0.2968440000000001 0.4481469999999987 0.0508159999999975  
0.4054780000000022 0.3504659999999973 0.1320419999999984  
0.0296510000000012 0.2558030000000002 0.2164169999999999  
0.1334599999999995 0.4083380000000005 0.2987809999999982  
0.5659899999999993 0.2654339999999991 0.0657059999999987  
0.6752099999999999 0.4172700000000020 0.1453479999999985  
0.7974979999999974 0.3212079999999986 0.2301670000000016  
0.8994069999999965 0.4754069999999970 0.3117170000000016  
0.7968440000000001 0.4481469999999987 0.0508159999999975  
0.9052349999999976 0.3505600000000015 0.1318699999999993  
0.5275930000000003 0.2516490000000005 0.2172020000000003  
0.6341520000000003 0.4036230000000032 0.2978000000000023  
0.0659899999999993 0.5154339999999991 0.0657059999999987  
0.1735159999999993 0.6668110000000027 0.1440049999999999  
0.2915789999999987 0.5715280000000007 0.2287869999999970  
0.4037870000000012 0.7274790000000024 0.3075100000000006  
0.2968440000000001 0.6981469999999987 0.0508159999999975  
0.4049550000000011 0.6005529999999979 0.1317609999999974  
0.0230729999999966 0.5056930000000008 0.2176800000000014  
0.1343480000000028 0.6558679999999981 0.2993280000000027

0.565989999999993 0.515433999999991 0.0657059999999987  
0.674542999999999 0.6675830000000005 0.1440070000000020  
0.7938350000000014 0.5729309999999970 0.2302650000000028  
0.907209999999992 0.7283400000000029 0.3080849999999984  
0.7968440000000001 0.6981469999999987 0.0508159999999975  
0.9048179999999988 0.6003860000000003 0.1317889999999977  
0.5258249999999975 0.5085890000000006 0.2164149999999978  
0.6328010000000006 0.6580709999999996 0.3000219999999985  
0.065989999999993 0.765433999999991 0.0657059999999987  
0.1741560000000035 0.9173380000000009 0.1439850000000007  
0.2933620000000019 0.8217300000000023 0.2280019999999965  
0.4055409999999995 0.9739980000000017 0.3078160000000025  
0.2968440000000001 0.9481469999999987 0.0508159999999975  
0.4058479999999989 0.8505359999999982 0.1316720000000018  
0.0259250000000009 0.7548770000000005 0.2163139999999970  
0.1369299999999996 0.9082509999999999 0.2962509999999980  
0.565989999999993 0.765433999999991 0.0657059999999987  
0.6751700000000014 0.9172599999999989 0.1443080000000023  
0.7932070000000024 0.8212260000000029 0.2293540000000007  
0.9064529999999991 0.9740439999999992 0.3099490000000031  
0.7968440000000001 0.9481469999999987 0.0508159999999975  
0.9054900000000004 0.8506679999999989 0.1315110000000033

0.5273800000000008 0.7549250000000001 0.2173840000000027

0.63883400000000028 0.9070979999999977 0.2969799999999978

Ti(101)-NHO

10.4025979999999993 -2.8696869999999999 -0.1615660000000000

0.0000000000000000 11.3235840000000003 0.0117790000000000

0.0000000000000000 0.0000000000000000 26.8160300000000014

H N O Ti

1 1 1 64

Selective dynamics

Direct

0.3306609999999992 0.4569729999999979 0.3883900000000011

0.3116380000000021 0.4811180000000022 0.3533279999999976

0.2015079999999969 0.537999999999967 0.3453549999999979

0.0659899999999993 0.0154339999999991 0.0657059999999987

0.1755339999999990 0.1675260000000023 0.1444880000000026

0.2948450000000022 0.0703639999999979 0.2283830000000009

0.4007399999999990 0.2188250000000025 0.3077279999999973

0.2968440000000001 0.1981469999999987 0.0508159999999975

0.4056939999999969 0.1006029999999996 0.1315310000000025

0.0268680000000003 0.0048730000000035 0.2172780000000003

0.1361849999999976 0.1566410000000005 0.2957480000000032

|                    |                    |                    |
|--------------------|--------------------|--------------------|
| 0.565989999999993  | 0.015433999999991  | 0.065705999999987  |
| 0.6753610000000023 | 0.167175999999978  | 0.144041999999989  |
| 0.7965080000000029 | 0.073569999999966  | 0.2287230000000022 |
| 0.9065930000000009 | 0.225425999999988  | 0.3070480000000018 |
| 0.7968440000000001 | 0.198146999999987  | 0.050815999999975  |
| 0.906233999999978  | 0.100495999999997  | 0.1317030000000017 |
| 0.5279510000000016 | 0.0034940000000034 | 0.2166250000000005 |
| 0.6366190000000032 | 0.153145999999996  | 0.296565999999986  |
| 0.065989999999993  | 0.265433999999991  | 0.065705999999987  |
| 0.1744950000000003 | 0.417600999999977  | 0.1444350000000014 |
| 0.298290999999990  | 0.320273999999977  | 0.230505999999983  |
| 0.409951999999970  | 0.4771870000000007 | 0.314849999999999  |
| 0.2968440000000001 | 0.448146999999987  | 0.050815999999975  |
| 0.4056160000000020 | 0.3510070000000027 | 0.132032999999998  |
| 0.0294390000000035 | 0.2568910000000031 | 0.2166300000000021 |
| 0.1347530000000035 | 0.4086380000000034 | 0.2965090000000004 |
| 0.565989999999993  | 0.265433999999991  | 0.065705999999987  |
| 0.674684999999966  | 0.418028999999971  | 0.144987999999979  |
| 0.7957760000000036 | 0.322868999999972  | 0.2297650000000004 |
| 0.901868999999978  | 0.4756270000000029 | 0.3104680000000002 |
| 0.7968440000000001 | 0.448146999999987  | 0.050815999999975  |
| 0.9055600000000013 | 0.350760999999985  | 0.131895999999976  |

|                   |                   |                   |
|-------------------|-------------------|-------------------|
| 0.528398000000028 | 0.252595999999969 | 0.216673999999976 |
| 0.636037999999992 | 0.401355000000023 | 0.300052999999983 |
| 0.065989999999993 | 0.515433999999991 | 0.065705999999987 |
| 0.173898999999987 | 0.666684000000036 | 0.144140000000002 |
| 0.292923999999993 | 0.570703000000017 | 0.229374999999974 |
| 0.404558999999990 | 0.724910000000013 | 0.307411000000019 |
| 0.296844000000001 | 0.698146999999987 | 0.050815999999975 |
| 0.405113999999975 | 0.600025000000023 | 0.132055999999986 |
| 0.024309000000024 | 0.505980999999985 | 0.217874999999994 |
| 0.136080999999972 | 0.656880999999985 | 0.296615000000027 |
| 0.565989999999993 | 0.515433999999991 | 0.065705999999987 |
| 0.674227999999994 | 0.667068000000004 | 0.144452999999986 |
| 0.793539000000027 | 0.572395999999977 | 0.231011999999998 |
| 0.907809000000003 | 0.730010000000000 | 0.307549000000016 |
| 0.796844000000001 | 0.698146999999987 | 0.050815999999975 |
| 0.904707000000019 | 0.600316999999969 | 0.132227999999978 |
| 0.526212999999985 | 0.507083999999990 | 0.218251000000022 |
| 0.635280999999991 | 0.662917000000002 | 0.297266999999979 |
| 0.065989999999993 | 0.765433999999991 | 0.065705999999987 |
| 0.174196999999995 | 0.917279999999981 | 0.143988000000002 |
| 0.293736000000027 | 0.820824999999992 | 0.228194999999995 |
| 0.405087999999992 | 0.972831999999968 | 0.307605000000023 |

|                     |                     |                     |
|---------------------|---------------------|---------------------|
| 0.2968440000000001  | 0.9481469999999987  | 0.0508159999999975  |
| 0.4054909999999978  | 0.8506739999999979  | 0.1315570000000008  |
| 0.0270280000000014  | 0.7546400000000020  | 0.2164539999999988  |
| 0.13689200000000031 | 0.9087269999999990  | 0.2964419999999990  |
| 0.5659899999999993  | 0.7654339999999991  | 0.0657059999999987  |
| 0.67543400000000028 | 0.91737100000000028 | 0.1439620000000019  |
| 0.79440900000000017 | 0.82245700000000000 | 0.22853700000000029 |
| 0.90621800000000026 | 0.9756989999999988  | 0.30996600000000029 |
| 0.79684400000000001 | 0.9481469999999987  | 0.0508159999999975  |
| 0.9055609999999987  | 0.85061100000000007 | 0.1314089999999979  |
| 0.5270099999999971  | 0.75557200000000008 | 0.2166799999999967  |
| 0.6382589999999979  | 0.90683700000000030 | 0.29592800000000035 |

Ti(101)-NH<sub>2</sub>O

|                     |                      |                      |
|---------------------|----------------------|----------------------|
| 10.4025979999999993 | -2.8696869999999999  | -0.16156600000000000 |
| 0.00000000000000000 | 11.32358400000000003 | 0.01177900000000000  |
| 0.00000000000000000 | 0.00000000000000000  | 26.81603000000000014 |

|   |   |   |    |
|---|---|---|----|
| H | N | O | Ti |
| 2 | 1 | 1 | 64 |

Selective dynamics

Direct

|                     |                     |                     |
|---------------------|---------------------|---------------------|
| 0.26934399999999967 | 0.41637599999999996 | 0.37998499999999978 |
|---------------------|---------------------|---------------------|

0.363422999999974 0.562117999999981 0.383547000000001  
0.304654999999968 0.496963999999984 0.360987000000015  
0.198666000000029 0.543621999999992 0.345610999999981  
0.065989999999993 0.015433999999991 0.065705999999987  
0.174757999999971 0.167425000000015 0.144148999999988  
0.293813999999976 0.069729000000024 0.227594000000034  
0.401536000000001 0.219191000000021 0.304853999999988  
0.296844000000001 0.198146999999987 0.050815999999975  
0.404921999999991 0.100628999999979 0.131202000000018  
0.025728000000009 0.005149000000030 0.217241999999988  
0.135731999999973 0.156647999999970 0.295445999999983  
0.565989999999993 0.015433999999991 0.065705999999987  
0.674916000000032 0.166657000000007 0.144025999999967  
0.795639999999988 0.072217000000020 0.228310999999979  
0.905684999999983 0.224913000000008 0.306930999999987  
0.796844000000001 0.198146999999987 0.050815999999975  
0.905437999999966 0.100560000000015 0.131599000000014  
0.525723999999967 0.003495000000009 0.216447000000023  
0.636400000000019 0.153961999999999 0.294902000000004  
0.065989999999993 0.265433999999991 0.065705999999987  
0.174227999999994 0.417287999999992 0.143889000000015  
0.295991000000008 0.320435000000034 0.228897000000035



0.4102749999999986 0.4742829999999998 0.3140110000000007  
0.2968440000000001 0.4481469999999987 0.0508159999999975  
0.4052700000000016 0.3514479999999978 0.1316559999999996  
0.0278139999999993 0.2570819999999969 0.2164130000000029  
0.1379549999999981 0.4086130000000026 0.2961669999999970  
0.5659899999999993 0.2654339999999991 0.0657059999999987  
0.6743809999999968 0.4181359999999970 0.1442970000000017  
0.7954489999999979 0.3235829999999993 0.2286969999999968  
0.9076129999999978 0.4753210000000010 0.3075970000000012  
0.7968440000000001 0.4481469999999987 0.0508159999999975  
0.9052179999999979 0.3507710000000017 0.1314479999999989  
0.5285119999999992 0.2548340000000024 0.2156260000000003  
0.6383769999999984 0.4017270000000011 0.3005750000000020  
0.0659899999999993 0.5154339999999991 0.0657059999999987  
0.1742320000000035 0.6673639999999992 0.1439919999999972  
0.2951910000000026 0.5711930000000009 0.2290720000000022  
0.4047320000000028 0.7231220000000036 0.3075120000000027  
0.2968440000000001 0.6981469999999987 0.0508159999999975  
0.4053320000000014 0.6000909999999990 0.1318079999999995  
0.0270920000000032 0.5065329999999975 0.2164750000000026  
0.1380709999999965 0.6577399999999969 0.2962119999999970  
0.5659899999999993 0.5154339999999991 0.0657059999999987

0.6740580000000023 0.6669740000000033 0.1443370000000002  
0.7929219999999972 0.5708569999999966 0.2302359999999979  
0.9067020000000028 0.7263030000000015 0.3073699999999988  
0.7968440000000001 0.6981469999999987 0.0508159999999975  
0.9045180000000030 0.6005880000000019 0.1320509999999970  
0.5271499999999989 0.5051440000000014 0.2187959999999975  
0.6372539999999987 0.6635109999999997 0.2961159999999978  
0.0659899999999993 0.7654339999999991 0.0657059999999987  
0.1736300000000028 0.9172790000000006 0.1438909999999964  
0.2941969999999969 0.8206160000000011 0.2285010000000014  
0.4049499999999995 0.9738010000000017 0.3083260000000010  
0.2968440000000001 0.9481469999999987 0.0508159999999975  
0.4049309999999977 0.8506920000000022 0.1315650000000019  
0.0271359999999987 0.7547560000000004 0.2164720000000031  
0.1361119999999971 0.9086720000000028 0.2962830000000025  
0.5659899999999993 0.7654339999999991 0.0657059999999987  
0.6748910000000024 0.9172849999999997 0.1439140000000023  
0.7948549999999983 0.8217890000000025 0.2286270000000030  
0.9049029999999973 0.9744239999999991 0.3097860000000026  
0.7968440000000001 0.9481469999999987 0.0508159999999975  
0.9050859999999972 0.8506360000000015 0.1313850000000016  
0.5274379999999965 0.7557729999999978 0.2166229999999985

0.6361240000000024 0.9067390000000017 0.2958179999999970

Ti(101)-O

10.4025979999999993 -2.8696869999999999 -0.1615660000000000

0.0000000000000000 11.3235840000000003 0.0117790000000000

0.0000000000000000 0.0000000000000000 26.8160300000000014

O Ti

1 64

Selective dynamics

Direct

0.2713249999999974 0.5646920000000009 0.3165130000000005

0.0659899999999993 0.0154339999999991 0.0657059999999987

0.1741290000000006 0.1665800000000033 0.1441090000000003

0.2953830000000011 0.0704279999999997 0.2291129999999981

0.4066839999999985 0.2222579999999965 0.3091110000000015

0.2968440000000001 0.1981469999999987 0.0508159999999975

0.4049520000000015 0.1002579999999966 0.1317700000000031

0.0272569999999988 0.0043900000000008 0.2168229999999980

0.1350649999999973 0.1573599999999971 0.2967330000000032

0.5659899999999993 0.0154339999999991 0.0657059999999987

0.6744500000000002 0.1665279999999996 0.1442410000000010

0.7951830000000015 0.0696089999999998 0.2289979999999971

|                   |                   |                   |
|-------------------|-------------------|-------------------|
| 0.904049999999980 | 0.220937999999967 | 0.309252000000007 |
| 0.796844000000001 | 0.198146999999987 | 0.050815999999975 |
| 0.904505999999978 | 0.099814000000021 | 0.131759999999999 |
| 0.526366000000030 | 0.003804999999998 | 0.217511000000018 |
| 0.636316999999982 | 0.157096000000028 | 0.296729999999966 |
| 0.065989999999993 | 0.265433999999991 | 0.065705999999987 |
| 0.175539999999980 | 0.417498000000019 | 0.144683999999980 |
| 0.294367999999986 | 0.319026000000009 | 0.229084000000003 |
| 0.406064000000006 | 0.469065000000005 | 0.308680000000025 |
| 0.296844000000001 | 0.448146999999987 | 0.050815999999975 |
| 0.404769000000017 | 0.349701000000031 | 0.131431999999967 |
| 0.025072999999990 | 0.252845000000007 | 0.216726999999988 |
| 0.134413000000021 | 0.406210000000015 | 0.296911999999990 |
| 0.565989999999993 | 0.265433999999991 | 0.065705999999987 |
| 0.674517000000016 | 0.416482000000020 | 0.144128000000020 |
| 0.795290000000014 | 0.319476999999991 | 0.228914000000032 |
| 0.904251000000021 | 0.472251999999975 | 0.307639999999992 |
| 0.796844000000001 | 0.448146999999987 | 0.050815999999975 |
| 0.905071999999970 | 0.349997000000019 | 0.131590000000028 |
| 0.526460000000002 | 0.254759999999974 | 0.217204999999999 |
| 0.637070999999988 | 0.406891999999991 | 0.296456999999966 |
| 0.065989999999993 | 0.515433999999991 | 0.065705999999987 |

0.1753130000000027 0.6664800000000000 0.1446529999999981  
0.2940540000000027 0.5703699999999969 0.2300030000000035  
0.4063659999999985 0.7279550000000015 0.3086890000000011  
0.2968440000000001 0.6981469999999987 0.0508159999999975  
0.4050670000000025 0.6005430000000018 0.1317090000000007  
0.0247919999999979 0.5040219999999991 0.2158439999999970  
0.1344629999999967 0.6550429999999992 0.2971130000000031  
0.5659899999999993 0.5154339999999991 0.0657059999999987  
0.6742440000000016 0.6665240000000026 0.1440800000000024  
0.7940770000000015 0.5698829999999973 0.2284930000000003  
0.9023150000000015 0.7219550000000012 0.3090509999999966  
0.7968440000000001 0.6981469999999987 0.0508159999999975  
0.9052089999999993 0.6004149999999981 0.1314640000000011  
0.5247919999999979 0.5040660000000017 0.2159270000000006  
0.6336310000000012 0.6557159999999982 0.2953660000000013  
0.0659899999999993 0.7654339999999991 0.0657059999999987  
0.1740080000000006 0.9165909999999968 0.1440979999999996  
0.2931340000000020 0.8212100000000007 0.2290980000000005  
0.4065569999999994 0.9738710000000026 0.3091170000000005  
0.2968440000000001 0.9481469999999987 0.0508159999999975  
0.4046319999999994 0.8509669999999971 0.1315570000000008  
0.0242089999999990 0.7545479999999998 0.2167880000000011

|                   |                   |                   |
|-------------------|-------------------|-------------------|
| 0.134799000000010 | 0.904020000000027 | 0.296917999999980 |
| 0.565989999999993 | 0.765433999999991 | 0.065705999999987 |
| 0.673687000000010 | 0.916516999999989 | 0.144039999999968 |
| 0.794136000000017 | 0.820782000000012 | 0.228611000000008 |
| 0.906537000000001 | 0.972026999999971 | 0.308402999999984 |
| 0.796844000000001 | 0.948146999999987 | 0.050815999999975 |
| 0.904755999999990 | 0.850498000000018 | 0.131639999999973 |
| 0.524633999999989 | 0.754624999999972 | 0.216166000000012 |
| 0.638483999999983 | 0.907412999999982 | 0.296944000000034 |

#### Ti(101)-OH

|                    |                    |                    |
|--------------------|--------------------|--------------------|
| 10.402597999999993 | -2.869686999999999 | -0.161566000000000 |
| 0.000000000000000  | 11.323584000000003 | 0.011779000000000  |
| 0.000000000000000  | 0.000000000000000  | 26.816030000000014 |

|   |   |    |
|---|---|----|
| H | O | Ti |
| 1 | 1 | 64 |

#### Selective dynamics

##### Direct

|                   |                   |                   |
|-------------------|-------------------|-------------------|
| 0.252242000000025 | 0.557791000000017 | 0.382404000000011 |
| 0.264158999999994 | 0.561593000000020 | 0.346241999999966 |
| 0.065989999999993 | 0.015433999999991 | 0.065705999999987 |
| 0.174548000000015 | 0.166635999999969 | 0.144522999999995 |

|                    |                    |                    |
|--------------------|--------------------|--------------------|
| 0.2971470000000025 | 0.0702179999999970 | 0.2296350000000018 |
| 0.4057069999999996 | 0.2243640000000013 | 0.3090959999999967 |
| 0.2968440000000001 | 0.1981469999999987 | 0.0508159999999975 |
| 0.4050319999999985 | 0.1002239999999972 | 0.1320260000000033 |
| 0.0286290000000022 | 0.0047240000000031 | 0.2176079999999985 |
| 0.1359100000000026 | 0.1583749999999995 | 0.2971020000000024 |
| 0.5659899999999993 | 0.0154339999999991 | 0.0657059999999987 |
| 0.6746359999999996 | 0.1665380000000027 | 0.1442180000000022 |
| 0.7967220000000026 | 0.0705030000000022 | 0.2294819999999973 |
| 0.9055409999999995 | 0.2240129999999994 | 0.3093900000000005 |
| 0.7968440000000001 | 0.1981469999999987 | 0.0508159999999975 |
| 0.9054539999999989 | 0.1006470000000022 | 0.1320920000000001 |
| 0.5279809999999969 | 0.0039530000000028 | 0.2175780000000032 |
| 0.6351769999999988 | 0.1561990000000009 | 0.2968010000000021 |
| 0.0659899999999993 | 0.2654339999999991 | 0.0657059999999987 |
| 0.1738029999999995 | 0.4166590000000028 | 0.1433370000000025 |
| 0.2939590000000010 | 0.3199900000000028 | 0.2295069999999981 |
| 0.4029179999999997 | 0.4749729999999985 | 0.3084980000000002 |
| 0.2968440000000001 | 0.4481469999999987 | 0.0508159999999975 |
| 0.4047010000000029 | 0.3508270000000024 | 0.1321879999999993 |
| 0.0267910000000029 | 0.2558030000000002 | 0.2175700000000020 |
| 0.1369100000000003 | 0.4085469999999987 | 0.2988860000000031 |

|                   |                   |                   |
|-------------------|-------------------|-------------------|
| 0.565989999999993 | 0.265433999999991 | 0.065705999999987 |
| 0.673875999999999 | 0.416792999999984 | 0.144229000000028 |
| 0.794927000000013 | 0.320154999999997 | 0.228805999999987 |
| 0.905279000000002 | 0.473339000000028 | 0.307074999999975 |
| 0.796844000000001 | 0.448146999999987 | 0.050815999999975 |
| 0.904985000000035 | 0.350400000000005 | 0.131833000000003 |
| 0.526718999999999 | 0.254994000000035 | 0.217506000000002 |
| 0.636217999999995 | 0.406309999999977 | 0.296875999999975 |
| 0.065989999999993 | 0.515433999999991 | 0.065705999999987 |
| 0.173861000000023 | 0.666488999999986 | 0.143436000000012 |
| 0.296492000000006 | 0.570610999999995 | 0.224291000000009 |
| 0.403258000000010 | 0.717011999999969 | 0.308264999999987 |
| 0.296844000000001 | 0.698146999999987 | 0.050815999999975 |
| 0.406283000000019 | 0.600704000000003 | 0.130375999999983 |
| 0.027579000000029 | 0.505383000000019 | 0.216858000000020 |
| 0.137166000000006 | 0.655360000000017 | 0.299235000000030 |
| 0.565989999999993 | 0.515433999999991 | 0.065705999999987 |
| 0.675123999999967 | 0.666882999999986 | 0.143940000000006 |
| 0.793778000000032 | 0.570408999999979 | 0.228827000000026 |
| 0.906235000000023 | 0.721825000000026 | 0.309201999999991 |
| 0.796844000000001 | 0.698146999999987 | 0.050815999999975 |
| 0.905324999999977 | 0.600441000000036 | 0.131892000000006 |



|                    |                    |                    |
|--------------------|--------------------|--------------------|
| 0.5266370000000009 | 0.5045059999999992 | 0.2174570000000031 |
| 0.6359399999999980 | 0.6558700000000002 | 0.2974430000000012 |
| 0.0659899999999993 | 0.7654339999999991 | 0.0657059999999987 |
| 0.1745710000000003 | 0.9164669999999973 | 0.1444940000000017 |
| 0.2939689999999970 | 0.8192000000000021 | 0.2295519999999982 |
| 0.4065939999999983 | 0.9693929999999966 | 0.3090070000000011 |
| 0.2968440000000001 | 0.9481469999999987 | 0.0508159999999975 |
| 0.4052530000000019 | 0.8498239999999981 | 0.1321909999999988 |
| 0.0270429999999990 | 0.7536690000000021 | 0.2176869999999980 |
| 0.1372270000000029 | 0.9054289999999980 | 0.2973380000000034 |
| 0.5659899999999993 | 0.7654339999999991 | 0.0657059999999987 |
| 0.6744330000000005 | 0.9165009999999967 | 0.1443859999999972 |
| 0.7952470000000034 | 0.8206909999999965 | 0.2294669999999996 |
| 0.9071330000000017 | 0.9725389999999976 | 0.3089810000000028 |
| 0.7968440000000001 | 0.9481469999999987 | 0.0508159999999975 |
| 0.9059949999999972 | 0.8503729999999976 | 0.1321719999999971 |
| 0.5273380000000003 | 0.7545300000000026 | 0.2174669999999992 |
| 0.6373940000000005 | 0.9063749999999970 | 0.2971429999999984 |

TiH<sub>1.97</sub>-NO<sub>3</sub>

|                     |                     |                     |
|---------------------|---------------------|---------------------|
| 10.1930359999999993 | -5.9205420000000002 | 0.0221310000000000  |
| 0.0000000000000000  | 11.7965890000000009 | -0.0158720000000000 |

0.0000000000000000 0.0000000000000000 27.2903899999999986

H N O Ti

96 1 3 48

Selective dynamics

Direct

|                    |                    |                    |
|--------------------|--------------------|--------------------|
| 0.0705460000000002 | 0.3465610000000012 | 0.0195900000000009 |
| 0.4036845653044761 | 0.0138307772470372 | 0.1238387005481414 |
| 0.2325443017214855 | 0.1723653361001257 | 0.2226721100136143 |
| 0.4867330000000010 | 0.4300550000000030 | 0.0814719999999980 |
| 0.3195079481984787 | 0.0963850865960851 | 0.1813975344047735 |
| 0.1536428640948035 | 0.2632151651725007 | 0.2847335256420035 |
| 0.0705460000000002 | 0.0965599999999966 | 0.0195900000000009 |
| 0.4041879027681285 | 0.2646678280209855 | 0.1239077196343038 |
| 0.2376538286544806 | 0.4339579201170792 | 0.2257102710246033 |
| 0.4867330000000010 | 0.1800550000000030 | 0.0814719999999980 |
| 0.3193933660771438 | 0.3464407091225798 | 0.1798973383805180 |
| 0.1525350040211904 | 0.0135360369390559 | 0.2859257885014919 |
| 0.3205450000000027 | 0.0965599999999966 | 0.0195900000000009 |
| 0.1540714917959495 | 0.2646235193273352 | 0.1239095008318213 |
| 0.4888156334626286 | 0.4338904208244288 | 0.2257244535671054 |
| 0.2367330000000010 | 0.1800539999999984 | 0.0814719999999980 |
| 0.0698513481082522 | 0.3476911962995389 | 0.1818780054810959 |

|                    |                    |                    |
|--------------------|--------------------|--------------------|
| 0.4035496836417307 | 0.0150531204113306 | 0.2857229180873683 |
| 0.3205450000000027 | 0.346559999999966  | 0.0195900000000009 |
| 0.1531124401996401 | 0.0125992361230349 | 0.1238173623638696 |
| 0.4858255998207182 | 0.1803397158137554 | 0.2239698644769010 |
| 0.2367330000000010 | 0.4300550000000030 | 0.0814719999999980 |
| 0.0692993382236018 | 0.0963411005853909 | 0.1813867417043137 |
| 0.4010684589629230 | 0.2631135199104510 | 0.2847379495002826 |
| 0.5705460000000002 | 0.3465610000000012 | 0.0195900000000009 |
| 0.9037591860287632 | 0.0138653461985488 | 0.1238308130283735 |
| 0.7371383558244956 | 0.1818029675170810 | 0.2241375642490616 |
| 0.9867330000000010 | 0.4300550000000030 | 0.0814719999999980 |
| 0.8203967980756400 | 0.0981383165568540 | 0.1815223830590105 |
| 0.6533454689736842 | 0.2649485470441150 | 0.2861423384025236 |
| 0.5705460000000002 | 0.096559999999966  | 0.0195900000000009 |
| 0.9039416281680348 | 0.2641386805741846 | 0.1238577530767203 |
| 0.7368868623066047 | 0.4309127710696301 | 0.2244031686359409 |
| 0.9867330000000010 | 0.1800550000000030 | 0.0814719999999980 |
| 0.8200102072299735 | 0.3477226768277601 | 0.1818918309029075 |
| 0.6540923750480687 | 0.0166598093830786 | 0.2851376664640816 |
| 0.8205460000000002 | 0.096559999999966  | 0.0195900000000009 |
| 0.6538210342931865 | 0.2642221783741477 | 0.1238603483542312 |
| 0.9864285251104873 | 0.4308865098529052 | 0.2244135695590884 |

|                    |                    |                    |
|--------------------|--------------------|--------------------|
| 0.736733000000010  | 0.180053999999984  | 0.081471999999980  |
| 0.5701711865473393 | 0.3477090725681569 | 0.1818750913081408 |
| 0.9030706790305186 | 0.0150099662980687 | 0.2856748778519252 |
| 0.820546000000002  | 0.346559999999966  | 0.019590000000009  |
| 0.6539498280935871 | 0.0142731576386255 | 0.1237716015462872 |
| 0.9871185140550119 | 0.1803425468944108 | 0.2239771230731084 |
| 0.736733000000010  | 0.430055000000030  | 0.081471999999980  |
| 0.5701004315395405 | 0.0981620674470325 | 0.1815342530954693 |
| 0.9031490217441027 | 0.2650612536184714 | 0.2861056678262896 |
| 0.070546000000002  | 0.846561000000012  | 0.019590000000009  |
| 0.4036631295400089 | 0.5138375742019182 | 0.1243268467556025 |
| 0.2396904918346290 | 0.6794987286927880 | 0.2264183707289373 |
| 0.486733000000010  | 0.930055000000030  | 0.081471999999980  |
| 0.3202273142116314 | 0.5968887747352325 | 0.1837632989679882 |
| 0.1535545926669349 | 0.7648175846623125 | 0.2856115531742994 |
| 0.070546000000002  | 0.596561000000012  | 0.019590000000009  |
| 0.4042042830473734 | 0.7631061186929645 | 0.1243474953180923 |
| 0.2350850715789898 | 0.9311443625613967 | 0.2236096374995220 |
| 0.486733000000010  | 0.680053999999984  | 0.081471999999980  |
| 0.3201698754182422 | 0.8474229685559025 | 0.1814723711954530 |
| 0.1433215956100615 | 0.5095081121094123 | 0.2864350212994692 |
| 0.320545000000027  | 0.596561000000012  | 0.019590000000009  |

0.1537811886322179 0.7625026129756186 0.1240995799189261  
0.4865674325625071 0.9342444558250743 0.2234717309026616  
0.2367330000000010 0.6800550000000030 0.0814719999999980  
0.0696908920372799 0.8469303665369365 0.1816891278563992  
0.3934580669242577 0.4953068275199690 0.2769777672658557  
0.3205450000000027 0.8465610000000012 0.0195900000000009  
0.1536915932654867 0.5140029539360724 0.1240497251924110  
0.4859856290403438 0.6794599055520865 0.2288507612814807  
0.2367330000000010 0.9300550000000030 0.0814719999999980  
0.0704393841390585 0.5973345774709522 0.1820241535526420  
0.4101732077309018 0.7813101789408077 0.2832014323316936  
0.5705460000000002 0.8465610000000012 0.0195900000000009  
0.9035389254540894 0.5135075769761889 0.1238805147237045  
0.7324126907332706 0.6793924649062388 0.2263803931260525  
0.9867330000000010 0.9300550000000030 0.0814719999999980  
0.8193098851438676 0.5974372735132082 0.1820492268182273  
0.6625654523547776 0.7811758500737589 0.2830868460852043  
0.5705460000000002 0.5965610000000012 0.0195900000000009  
0.9023393822193675 0.7624776339470160 0.1240927743483570  
0.7402540699484421 0.9342017542893194 0.2234801315521903  
0.9867330000000010 0.6800550000000030 0.0814719999999980  
0.8196510291110433 0.8473762993385388 0.1814647232374648

|                    |                    |                    |
|--------------------|--------------------|--------------------|
| 0.6575918733635739 | 0.5093707939969725 | 0.2864797807889168 |
| 0.8205460000000002 | 0.5965610000000012 | 0.0195900000000009 |
| 0.6524339284014574 | 0.7630718251136758 | 0.1243259419896991 |
| 0.9887297632876578 | 0.9310401969850154 | 0.2236214985104149 |
| 0.7367330000000010 | 0.6800550000000030 | 0.0814719999999980 |
| 0.5699764407285536 | 0.8475824194777374 | 0.1811553451742582 |
| 0.9033533193651916 | 0.5150328801783176 | 0.2854079212788760 |
| 0.8205460000000002 | 0.8465610000000012 | 0.0195900000000009 |
| 0.6538384972665633 | 0.5140151232790622 | 0.1240792396043634 |
| 0.9865799713939312 | 0.6807254419092261 | 0.2244358028557402 |
| 0.7367330000000010 | 0.9300550000000030 | 0.0814719999999980 |
| 0.5689909785418246 | 0.5969480296989553 | 0.1837623782121944 |
| 0.9029855934389709 | 0.7648422096467699 | 0.2855752119973340 |
| 0.4467072946197342 | 0.6017006036158541 | 0.3597509519454234 |
| 0.5422280124314053 | 0.6021247059423639 | 0.3354509784324283 |
| 0.3516425251205976 | 0.6020007069598620 | 0.3354600227509558 |
| 0.4455406442046266 | 0.5998091917601290 | 0.4045851701893065 |
| 0.4036389999999983 | 0.2633080000000021 | 0.0542870000000022 |
| 0.2370853256816021 | 0.4322046432502473 | 0.1534579742477311 |
| 0.0688843959995625 | 0.0960526972675636 | 0.2512538997644580 |
| 0.4036389999999983 | 0.0133080000000021 | 0.0542870000000022 |
| 0.2362638426186603 | 0.1794222578472156 | 0.1521810372104450 |

|                    |                    |                    |
|--------------------|--------------------|--------------------|
| 0.0686521587239026 | 0.3461516212702136 | 0.2512210211524877 |
| 0.1536389999999983 | 0.0133080000000021 | 0.0542870000000022 |
| 0.4868326251932196 | 0.1808178955586908 | 0.1526739640729612 |
| 0.3151623745673162 | 0.3384560988994918 | 0.2477099676192938 |
| 0.1536389999999983 | 0.2633080000000021 | 0.0542870000000022 |
| 0.4880301055763752 | 0.4322852612745363 | 0.1534682596634546 |
| 0.3192771359697674 | 0.0960729808676743 | 0.2512833093440596 |
| 0.9036389999999983 | 0.2633080000000021 | 0.0542870000000022 |
| 0.7367825648532617 | 0.4308744482793813 | 0.1530421458504818 |
| 0.5705699242191425 | 0.1000974304090764 | 0.2512933066910258 |
| 0.9036389999999983 | 0.0133080000000021 | 0.0542870000000022 |
| 0.7370683971234094 | 0.1812500543733920 | 0.1527130430294634 |
| 0.5695354428975915 | 0.3461066963014555 | 0.2512484351905281 |
| 0.6536389999999983 | 0.0133080000000021 | 0.0542870000000022 |
| 0.9869837786656934 | 0.1807810722659646 | 0.1527036758210315 |
| 0.8196655600892222 | 0.3475352926361790 | 0.2515339215386888 |
| 0.6536389999999983 | 0.2633080000000021 | 0.0542870000000022 |
| 0.9869527694423323 | 0.4307667488120761 | 0.1530036762883931 |
| 0.8215742129422892 | 0.1001827283190965 | 0.2512693824542295 |
| 0.4036389999999983 | 0.7633080000000021 | 0.0542870000000022 |
| 0.2365408164556479 | 0.9298128627613986 | 0.1526677370301648 |
| 0.0704158246792893 | 0.5981870475255968 | 0.2513468080274921 |

|                    |                    |                    |
|--------------------|--------------------|--------------------|
| 0.403638999999983  | 0.513308000000021  | 0.054287000000022  |
| 0.2377288242585462 | 0.6797128329612848 | 0.1536750323258507 |
| 0.0699081074112035 | 0.8475383196383736 | 0.2514279473358337 |
| 0.153638999999983  | 0.513308000000021  | 0.054287000000022  |
| 0.4857388164832568 | 0.6785726576697364 | 0.1545909146573206 |
| 0.3192502181263724 | 0.8502196016038706 | 0.2505306675580123 |
| 0.153638999999983  | 0.763308000000021  | 0.054287000000022  |
| 0.4871315698026423 | 0.9309320831674023 | 0.1526387219595474 |
| 0.3209588830811571 | 0.5983916858190261 | 0.2598899912673964 |
| 0.903638999999983  | 0.763308000000021  | 0.054287000000022  |
| 0.7368188075188367 | 0.9308326468392483 | 0.1526289202925756 |
| 0.5695549760326331 | 0.5982932469289444 | 0.2597298645230306 |
| 0.903638999999983  | 0.513308000000021  | 0.054287000000022  |
| 0.7349709923274708 | 0.6797691820274538 | 0.1536368967704976 |
| 0.5728161740290579 | 0.8537157168237540 | 0.2495505799089913 |
| 0.653638999999983  | 0.513308000000021  | 0.054287000000022  |
| 0.9865070798018444 | 0.6799627371294064 | 0.1529087108919054 |
| 0.8229434249998854 | 0.8500348925728447 | 0.2505086687368674 |
| 0.653638999999983  | 0.763308000000021  | 0.054287000000022  |
| 0.9862306554692853 | 0.9297742358705108 | 0.1526426264229594 |
| 0.8196270070667591 | 0.5980610022759555 | 0.2514037576853025 |



TiH<sub>1.97</sub>-Hv-NO<sub>3</sub>H

|                    |                    |                    |
|--------------------|--------------------|--------------------|
| 10.193035999999993 | -5.920542000000002 | 0.022131000000000  |
| 0.000000000000000  | 11.796589000000009 | -0.015872000000000 |
| 0.000000000000000  | 0.000000000000000  | 27.290389999999986 |

|    |   |   |    |
|----|---|---|----|
| H  | N | O | Ti |
| 96 | 1 | 3 | 48 |

Selective dynamics

Direct

|                    |                    |                    |
|--------------------|--------------------|--------------------|
| 0.070546000000002  | 0.346561000000012  | 0.019590000000009  |
| 0.4045947802132775 | 0.0138358621725562 | 0.1238805119868844 |
| 0.2422211210405698 | 0.1914732190824102 | 0.2272167975362564 |
| 0.486733000000010  | 0.430055000000030  | 0.081471999999980  |
| 0.3201183123655064 | 0.0989299022525679 | 0.1818905118750978 |
| 0.1416530858899616 | 0.2568684914008053 | 0.2846801823644279 |
| 0.070546000000002  | 0.096559999999966  | 0.019590000000009  |
| 0.4041807987073970 | 0.2651009538198281 | 0.1242120024086441 |
| 0.2346317275955346 | 0.4286024941482208 | 0.2254099050200535 |
| 0.486733000000010  | 0.180055000000030  | 0.081471999999980  |
| 0.3215799659313636 | 0.3508218703235418 | 0.1855463741370887 |
| 0.1540345842863362 | 0.0159344019896293 | 0.2861076435828031 |
| 0.320545000000027  | 0.096559999999966  | 0.019590000000009  |
| 0.1543212014553468 | 0.2650604784614978 | 0.1241803460264540 |

0.4867249592931256 0.4286485947042976 0.2253766180248324  
0.2367330000000010 0.1800539999999984 0.0814719999999980  
0.0691114083213841 0.3468716677950117 0.1815044017864718  
0.4022801247449480 0.0139901378176461 0.2855134329208865  
0.3205450000000027 0.3465599999999966 0.0195900000000009  
0.1553315920868193 0.0169015273670306 0.1241137110835733  
0.4860436763701128 0.1776729215108000 0.2237302546577257  
0.2367330000000010 0.4300550000000030 0.0814719999999980  
0.0711792788452712 0.0989785844232830 0.1819717068973722  
0.4069546483423059 0.2567030046626921 0.2845138816316478  
0.5705460000000002 0.3465610000000012 0.0195900000000009  
0.9030724647567013 0.0139376746274630 0.1238350707072488  
0.7359429877205382 0.1793705141024796 0.2242265888671085  
0.9867330000000010 0.4300550000000030 0.0814719999999980  
0.8192714970140752 0.0962905220158153 0.1817519063345989  
0.6546158317242895 0.2616781505204057 0.2863055015932483  
0.5705460000000002 0.0965599999999966 0.0195900000000009  
0.9030569165615012 0.2628675912875105 0.1237307535608689  
0.7401414261784536 0.4315650146774483 0.2229120012115106  
0.9867330000000010 0.1800550000000030 0.0814719999999980  
0.8195123795010032 0.3465119484854789 0.1811756315157651  
0.6513168077025203 0.0111783604435369 0.2859365608945695

|                    |                    |                    |
|--------------------|--------------------|--------------------|
| 0.8205460000000002 | 0.0965599999999966 | 0.0195900000000009 |
| 0.6533416919496011 | 0.2629154746848502 | 0.1237369838799188 |
| 0.9844096095496283 | 0.4316215015363690 | 0.2229239354949809 |
| 0.7367330000000010 | 0.1800539999999984 | 0.0814719999999980 |
| 0.5703621807327889 | 0.3470199105671642 | 0.1814314889563325 |
| 0.9034293729367325 | 0.0140504624725825 | 0.2854209100040730 |
| 0.8205460000000002 | 0.3465599999999966 | 0.0195900000000009 |
| 0.6531907459977667 | 0.0127968910712758 | 0.1238234627929095 |
| 0.9843076241385526 | 0.1775537310722196 | 0.2237803352005018 |
| 0.7367330000000010 | 0.4300550000000030 | 0.0814719999999980 |
| 0.5693117217670053 | 0.0961566642861047 | 0.1817200689217838 |
| 0.8987829398732849 | 0.2617122492347902 | 0.2864891350428321 |
| 0.0705460000000002 | 0.8465610000000012 | 0.0195900000000009 |
| 0.4038056161358461 | 0.5139722149068839 | 0.1242228097258102 |
| 0.2345741289133712 | 0.6827423696747115 | 0.2231191137138608 |
| 0.4867330000000010 | 0.9300550000000030 | 0.0814719999999980 |
| 0.3197989645235716 | 0.5974567637566799 | 0.1832613829025209 |
| 0.1513657146861466 | 0.7644340246808411 | 0.2852088504465110 |
| 0.0705460000000002 | 0.5965610000000012 | 0.0195900000000009 |
| 0.4042820397538551 | 0.7629216431704390 | 0.1239855408428364 |
| 0.2372267577136038 | 0.9318060393202685 | 0.2236611374548156 |
| 0.4867330000000010 | 0.6800539999999984 | 0.0814719999999980 |

0.3194975486290274 0.8474103878583672 0.1815725053672450  
0.1340328606879869 0.5121456653165238 0.2826900163670610  
0.3205450000000027 0.5965610000000012 0.0195900000000009  
0.1552376053833698 0.7648528194088637 0.1238260416655703  
0.4861186487387628 0.9287057712807361 0.2244942455632100  
0.2367330000000010 0.6800550000000030 0.0814719999999980  
0.0708743465917424 0.8490831945806787 0.1811113605559493  
0.3205450000000027 0.8465610000000012 0.0195900000000009  
0.1542035198252724 0.5130022955493311 0.1239114209801940  
0.4820327671849624 0.6709234663072239 0.2295487404324568  
0.2367330000000010 0.9300550000000030 0.0814719999999980  
0.0693733144850192 0.5977489561151975 0.1802345748176365  
0.4010081106425936 0.7672285897051534 0.2862854104947054  
0.5705460000000002 0.8465610000000012 0.0195900000000009  
0.9039478715896304 0.5140221225545366 0.1236877852833791  
0.7411817261709172 0.6828184512418760 0.2231586485047532  
0.9867330000000010 0.9300550000000030 0.0814719999999980  
0.8210524602397673 0.5978083396115348 0.1801407643197982  
0.6584345731010668 0.7675298143450864 0.2861606515044561  
0.5705460000000002 0.5965610000000012 0.0195900000000009  
0.9034258808446768 0.7648926162095270 0.1237947740747876  
0.7353666091293279 0.9288338711332157 0.2244676924891911

|                    |                    |                    |
|--------------------|--------------------|--------------------|
| 0.986733000000010  | 0.680055000000030  | 0.081471999999980  |
| 0.8205536057810519 | 0.8475673545727810 | 0.1814859350091766 |
| 0.6705050286677352 | 0.5121312179129264 | 0.2827443249961445 |
| 0.820546000000002  | 0.596561000000012  | 0.019590000000009  |
| 0.6525244080971492 | 0.7630744542747308 | 0.1239692080005569 |
| 0.9878453074610816 | 0.9321877769985356 | 0.2236797041745925 |
| 0.736733000000010  | 0.680055000000030  | 0.081471999999980  |
| 0.5692317684957529 | 0.8457287035637939 | 0.1825551541786420 |
| 0.9033922663728228 | 0.5149757509198531 | 0.2846106836368118 |
| 0.820546000000002  | 0.846561000000012  | 0.019590000000009  |
| 0.6524018993815122 | 0.5130058768831804 | 0.1239523464658096 |
| 0.9901543033537250 | 0.6870249723887711 | 0.2221204322856062 |
| 0.736733000000010  | 0.930055000000030  | 0.081471999999980  |
| 0.5704965375567657 | 0.5975418742599674 | 0.1833175282816858 |
| 0.9047916701886327 | 0.7644922798752574 | 0.2850244298636744 |
| 0.4284327999437615 | 0.5596620918989005 | 0.4059670581779581 |
| 0.4168908488628579 | 0.5417991368084569 | 0.3374889587058154 |
| 0.4783120832677125 | 0.4793179532597934 | 0.3111918971915476 |
| 0.2937151929628194 | 0.4800981693111875 | 0.3112138909408674 |
| 0.3863408437364157 | 0.4826259237817143 | 0.3846397635427555 |
| 0.403638999999983  | 0.263308000000021  | 0.054287000000022  |
| 0.2384798290669922 | 0.4314031724502448 | 0.1541659443025217 |

0.0706768705891371 0.0978271096943482 0.2512317244525383  
0.4036389999999983 0.0133080000000021 0.0542870000000022  
0.2385131161465902 0.1844284581935116 0.1541644610989725  
0.0602071776104105 0.3429261709943873 0.2505669514983008  
0.1536389999999983 0.0133080000000021 0.0542870000000022  
0.4867901146591255 0.1808146269781118 0.1528759738250498  
0.3258263232097198 0.3594010435446364 0.2607628652164287  
0.1536389999999983 0.2633080000000021 0.0542870000000022  
0.4859418980167320 0.4316204372468505 0.1542179385151174  
0.3194067194070855 0.0974863965055622 0.2510461547134372  
0.9036389999999983 0.2633080000000021 0.0542870000000022  
0.7366290192793590 0.4297416762911487 0.1522519151079832  
0.5694072882591410 0.0954743236319383 0.2514240916424354  
0.9036389999999983 0.0133080000000021 0.0542870000000022  
0.7361242415899303 0.1792902899212352 0.1527259118143957  
0.5749666291758279 0.3430443971864939 0.2505056286507357  
0.6536389999999983 0.0133080000000021 0.0542870000000022  
0.9869538445702336 0.1808143419059693 0.152839797977238  
0.8196193517514738 0.3467895536539108 0.2510537272065088  
0.6536389999999983 0.2633080000000021 0.0542870000000022  
0.9861962830090555 0.4296159459673323 0.1523136968981432  
0.8182615504212021 0.0956585337343931 0.2514319929798479

0.403638999999983 0.763308000000021 0.054287000000022  
0.2379565491506961 0.9323575081712814 0.1526857624370580  
0.0670344963728162 0.5999009729136925 0.2492714888235812  
0.403638999999983 0.513308000000021 0.054287000000022  
0.2374182548132857 0.6800080682551343 0.1527189381773641  
0.0714281710727582 0.8503366891156674 0.2508486576093809  
0.153638999999983 0.513308000000021 0.054287000000022  
0.4866610225057525 0.6798493384836344 0.1539483593708325  
0.3185262607648251 0.8484813359644755 0.2511685871568614  
0.153638999999983 0.763308000000021 0.054287000000022  
0.4866844674450687 0.9294393079242939 0.1530292510233457  
0.3088842968732772 0.5966544873571051 0.2538883963696377  
0.903638999999983 0.763308000000021 0.054287000000022  
0.7360290697957266 0.9296321964877631 0.1529304152090274  
0.5803954120066522 0.5965935747802030 0.2540341751569947  
0.903638999999983 0.513308000000021 0.054287000000022  
0.7357891560318423 0.6800884026674169 0.1526112414459608  
0.5679062625510886 0.8437094985822510 0.2517957371448578  
0.653638999999983 0.513308000000021 0.054287000000022  
0.9876711003228273 0.6820277508345239 0.1519136142143412  
0.8224447999046173 0.8486978962484452 0.2510468436536835  
0.653638999999983 0.763308000000021 0.054287000000022

0.9876450115759677 0.9323978803052391 0.1526346473259131

0.8254811456534252 0.5998059132758637 0.2490997340642296

TiH<sub>1.97</sub>-NO<sub>3</sub>H

10.193035999999993 -5.9205420000000002 0.0221310000000000

0.0000000000000000 11.7965890000000009 -0.0158720000000000

0.0000000000000000 0.0000000000000000 27.290389999999986

H N O Ti

97 1 3 48

Selective dynamics

Direct

0.0705460000000002 0.3465610000000012 0.0195900000000009

0.4040002648477449 0.0136599894880987 0.1238037936495860

0.2328498515978581 0.1721154472753254 0.2224214025262316

0.4867330000000010 0.4300550000000030 0.0814719999999980

0.3197920677219699 0.0964089394532132 0.1812267266900626

0.1534383178925650 0.2634305566448277 0.2840945738090822

0.0705460000000002 0.0965599999999966 0.0195900000000009

0.4044694594085359 0.2646870445967539 0.1239254607779022

0.2374749132666145 0.4347563082523277 0.2261429883841522

0.4867330000000010 0.1800550000000030 0.0814719999999980

0.3196006524457222 0.3463866207039030 0.1796034826522316



0.1531292353869836 0.0138031866810145 0.2859555594319700  
0.3205450000000027 0.096559999999966 0.0195900000000009  
0.1542009530217967 0.2646717051698234 0.1239169257898979  
0.4911154170124805 0.4356643699812293 0.2262406208662668  
0.2367330000000010 0.1800539999999984 0.0814719999999980  
0.0697955801626421 0.3475886146189979 0.1816786227833894  
0.4038005727630570 0.0154677512663953 0.2856389224844769  
0.3205450000000027 0.346559999999966 0.0195900000000009  
0.1533585967015092 0.0125318995724096 0.1237563410736591  
0.4860217829536698 0.1798225200608734 0.2236488931094896  
0.2367330000000010 0.4300550000000030 0.0814719999999980  
0.0695626010901740 0.0964901005556710 0.1812247859779168  
0.4022665044253599 0.2632064687011393 0.2841768695412408  
0.5705460000000002 0.3465610000000012 0.0195900000000009  
0.9035026252114542 0.0137110512218861 0.1237962264775020  
0.7373321873001175 0.1816627631288680 0.2239601987525481  
0.9867330000000010 0.4300550000000030 0.0814719999999980  
0.8204529135301227 0.0980786569001510 0.1813836509105635  
0.6538040325337265 0.2647351103456979 0.2861948265232306  
0.5705460000000002 0.096559999999966 0.0195900000000009  
0.9040214878575997 0.2641806841594760 0.1238078533766206  
0.7379808231734906 0.4310927261301812 0.2240196487591585

|                    |                    |                    |
|--------------------|--------------------|--------------------|
| 0.986733000000010  | 0.180055000000030  | 0.081471999999980  |
| 0.8202358933628064 | 0.3477150570267515 | 0.1817063524386704 |
| 0.6553285120443882 | 0.0182777193073954 | 0.2852043487370367 |
| 0.820546000000002  | 0.096559999999966  | 0.019590000000009  |
| 0.6541003729343994 | 0.2643436220834330 | 0.1238127246942037 |
| 0.9861295677016385 | 0.4310570579186722 | 0.2240521893730969 |
| 0.736733000000010  | 0.180053999999984  | 0.081471999999980  |
| 0.5705206119613643 | 0.3476224929872494 | 0.1816328606877247 |
| 0.9039414782769484 | 0.0154424621996977 | 0.2854147134663931 |
| 0.820546000000002  | 0.346559999999966  | 0.019590000000009  |
| 0.6539756999587490 | 0.0141766931497586 | 0.1237641244249430 |
| 0.9873068778022660 | 0.1799769796468115 | 0.2236346005244749 |
| 0.736733000000010  | 0.430055000000030  | 0.081471999999980  |
| 0.5702950267079979 | 0.0980129851966111 | 0.1814535544710414 |
| 0.9029813438019625 | 0.2648193438192336 | 0.2862279909014050 |
| 0.070546000000002  | 0.846561000000012  | 0.019590000000009  |
| 0.4038027935340610 | 0.5137989738556227 | 0.1244112913092205 |
| 0.2402486354682354 | 0.6792955383325118 | 0.2266913403860037 |
| 0.486733000000010  | 0.930055000000030  | 0.081471999999980  |
| 0.3204121553476678 | 0.5966587932891922 | 0.1838663567969514 |
| 0.1538125697725819 | 0.7647828429559029 | 0.2854637789282443 |
| 0.070546000000002  | 0.596561000000012  | 0.019590000000009  |

|                    |                    |                    |
|--------------------|--------------------|--------------------|
| 0.4046203574160245 | 0.7629894441666555 | 0.1243996129182326 |
| 0.2353542177046059 | 0.9315351873248047 | 0.2233412283633872 |
| 0.486733000000010  | 0.680053999999984  | 0.081471999999980  |
| 0.3202265715167162 | 0.8474523379266767 | 0.1813752481598328 |
| 0.1370511576386603 | 0.5073850855530543 | 0.2864959533631116 |
| 0.320545000000027  | 0.596561000000012  | 0.019590000000009  |
| 0.1541750793948393 | 0.7624775587412362 | 0.1240702605222493 |
| 0.4868068799842836 | 0.9346430183687383 | 0.2233132805245891 |
| 0.236733000000010  | 0.680055000000030  | 0.081471999999980  |
| 0.0701241352144509 | 0.8472687296634431 | 0.1815245156678152 |
| 0.3943898336586916 | 0.4968398641954209 | 0.2744255035558881 |
| 0.320545000000027  | 0.846561000000012  | 0.019590000000009  |
| 0.1540025328663913 | 0.5140361488584614 | 0.1240601548625137 |
| 0.4864524928156460 | 0.6787419477689319 | 0.2312532857698490 |
| 0.236733000000010  | 0.930055000000030  | 0.081471999999980  |
| 0.0708340513174391 | 0.5975478185128805 | 0.1818011036297048 |
| 0.4119753147959165 | 0.7854865946031256 | 0.2836818138420094 |
| 0.570546000000002  | 0.846561000000012  | 0.019590000000009  |
| 0.9037824455046517 | 0.5135839487630258 | 0.1238310971256552 |
| 0.7319031368175607 | 0.6790369525057672 | 0.2267122230158359 |
| 0.986733000000010  | 0.930055000000030  | 0.081471999999980  |
| 0.8197032759216851 | 0.5977684100023057 | 0.1817638474741662 |

|                    |                    |                    |
|--------------------|--------------------|--------------------|
| 0.6673482104927919 | 0.7880199938382393 | 0.2836139896172558 |
| 0.5705460000000002 | 0.5965610000000012 | 0.0195900000000009 |
| 0.9025041412640507 | 0.7625452883072850 | 0.1240576524430041 |
| 0.7409867940020488 | 0.9347922547925969 | 0.2232244077305218 |
| 0.9867330000000010 | 0.6800550000000030 | 0.0814719999999980 |
| 0.8202228561717988 | 0.8475824292805242 | 0.1811524732222082 |
| 0.6628922954161639 | 0.5066283992266344 | 0.2866406487095768 |
| 0.8205460000000002 | 0.5965610000000012 | 0.0195900000000009 |
| 0.6522179300161344 | 0.7630182382801967 | 0.1243486475506640 |
| 0.9901536521025469 | 0.9317930088936628 | 0.2232363597074531 |
| 0.7367330000000010 | 0.6800550000000030 | 0.0814719999999980 |
| 0.5699104659748879 | 0.8472143359647557 | 0.1814106992732327 |
| 0.9036807343549723 | 0.5150024059693553 | 0.2851316283406817 |
| 0.8205460000000002 | 0.8465610000000012 | 0.0195900000000009 |
| 0.6540056036994867 | 0.5140593374389227 | 0.1241002090026660 |
| 0.9876506981766265 | 0.6819467021397899 | 0.2239424035381043 |
| 0.7367330000000010 | 0.9300550000000030 | 0.0814719999999980 |
| 0.5693572362889507 | 0.5967624851407640 | 0.1834411125785914 |
| 0.9031339229652007 | 0.7649632277139155 | 0.2852923775985973 |
| 0.4711505300784069 | 0.5768247401049107 | 0.4233959503479028 |
| 0.4537837157322161 | 0.6253999620420176 | 0.3589230164630991 |
| 0.5427957455828927 | 0.5975386419210775 | 0.3315659309099780 |

|                    |                    |                    |
|--------------------|--------------------|--------------------|
| 0.3447907069683707 | 0.5938619209864494 | 0.3319906274179166 |
| 0.4047757937515688 | 0.5298779233544502 | 0.3981834685882014 |
| 0.4036389999999983 | 0.2633080000000021 | 0.0542870000000022 |
| 0.2374217839726073 | 0.4324455317777688 | 0.1536079706502650 |
| 0.0695065500060619 | 0.0963537939804161 | 0.2510717924668392 |
| 0.4036389999999983 | 0.0133080000000021 | 0.0542870000000022 |
| 0.2363595494164064 | 0.1791674211235545 | 0.1520633869109071 |
| 0.0671761727220453 | 0.3454259963826769 | 0.2508794912787319 |
| 0.1536389999999983 | 0.0133080000000021 | 0.0542870000000022 |
| 0.4871426975844630 | 0.1806005803700828 | 0.1525635575726745 |
| 0.3159840957375749 | 0.3384728695323854 | 0.2472076431910431 |
| 0.1536389999999983 | 0.2633080000000021 | 0.0542870000000022 |
| 0.4882979183361985 | 0.4325169458048953 | 0.1536445798555368 |
| 0.3196531377577371 | 0.0961914383494296 | 0.2510752519326452 |
| 0.9036389999999983 | 0.2633080000000021 | 0.0542870000000022 |
| 0.7369901144816996 | 0.4310030477765524 | 0.1529435407231352 |
| 0.5710494520006919 | 0.1003819611592208 | 0.2512589187081667 |
| 0.9036389999999983 | 0.0133080000000021 | 0.0542870000000022 |
| 0.7371992865043520 | 0.1812884261518424 | 0.1526278500625418 |
| 0.5707314699091917 | 0.3454091393868117 | 0.2508183426047100 |
| 0.6536389999999983 | 0.0133080000000021 | 0.0542870000000022 |
| 0.9868667134712948 | 0.1806604184757296 | 0.1525777069635178 |

|                    |                    |                    |
|--------------------|--------------------|--------------------|
| 0.8198238099403908 | 0.3470823955180733 | 0.2514779417885402 |
| 0.6536389999999983 | 0.2633080000000021 | 0.0542870000000022 |
| 0.9872732759973443 | 0.4308258440211801 | 0.1528886360701415 |
| 0.8222683182662420 | 0.1007631910124049 | 0.2511705991552406 |
| 0.4036389999999983 | 0.7633080000000021 | 0.0542870000000022 |
| 0.2368744404726889 | 0.9298847033084036 | 0.1525442263719923 |
| 0.0699620458694284 | 0.5984457886427066 | 0.2509484983365116 |
| 0.4036389999999983 | 0.5133080000000021 | 0.0542870000000022 |
| 0.2382709774817063 | 0.6797040874945758 | 0.1537306722101505 |
| 0.0706165628350617 | 0.8481101422633393 | 0.2513215793956131 |
| 0.1536389999999983 | 0.5133080000000021 | 0.0542870000000022 |
| 0.4856743941408934 | 0.6779672123925462 | 0.1549993273653570 |
| 0.3194236658002899 | 0.8509800384217634 | 0.2503251583796598 |
| 0.1536389999999983 | 0.7633080000000021 | 0.0542870000000022 |
| 0.4872683380831281 | 0.9306457851449310 | 0.1526793652760077 |
| 0.3194436393598512 | 0.5983980210503046 | 0.2628940747384699 |
| 0.9036389999999983 | 0.7633080000000021 | 0.0542870000000022 |
| 0.7365471890713432 | 0.9305306237947889 | 0.1526809765212965 |
| 0.5718487528870779 | 0.5988354992013126 | 0.2642537541973609 |
| 0.9036389999999983 | 0.5133080000000021 | 0.0542870000000022 |
| 0.7349997325785214 | 0.6799364036129398 | 0.1536303378633135 |
| 0.5741534358894208 | 0.8558763002437406 | 0.2497358769210399 |

|                    |                    |                    |
|--------------------|--------------------|--------------------|
| 0.653638999999983  | 0.513308000000021  | 0.054287000000022  |
| 0.9869107132543927 | 0.6801033624813976 | 0.1527664330526007 |
| 0.8246425019163780 | 0.8511787156118213 | 0.2499128287127241 |
| 0.653638999999983  | 0.763308000000021  | 0.054287000000022  |
| 0.9866130594451291 | 0.9300589028041014 | 0.1524422044651850 |
| 0.8212850286903223 | 0.5984102881306363 | 0.2508977142708473 |

TiH<sub>1.97</sub>-Hv-NO<sub>2</sub>

|                    |                    |                    |
|--------------------|--------------------|--------------------|
| 10.193035999999993 | -5.920542000000002 | 0.022131000000000  |
| 0.000000000000000  | 11.796589000000009 | -0.015872000000000 |
| 0.000000000000000  | 0.000000000000000  | 27.290389999999986 |

|    |   |   |    |
|----|---|---|----|
| H  | N | O | Ti |
| 95 | 1 | 2 | 48 |

Selective dynamics

Direct

|                    |                    |                    |
|--------------------|--------------------|--------------------|
| 0.070546000000002  | 0.346561000000012  | 0.019590000000009  |
| 0.4041796110675064 | 0.0135400821291455 | 0.1238663004478107 |
| 0.2393465213478110 | 0.1856888426952980 | 0.2260418954182135 |
| 0.486733000000010  | 0.430055000000030  | 0.081471999999980  |
| 0.3195782186709782 | 0.0974783572474291 | 0.1817343413088109 |
| 0.1400641997964299 | 0.2536191351022765 | 0.2847089376643253 |
| 0.070546000000002  | 0.096559999999966  | 0.019590000000009  |

|                    |                    |                    |
|--------------------|--------------------|--------------------|
| 0.4039640519415544 | 0.2648844502503645 | 0.1241665713861386 |
| 0.2354441600872722 | 0.4283267526599488 | 0.2246934516904669 |
| 0.4867330000000010 | 0.1800550000000030 | 0.0814719999999980 |
| 0.3201924936578361 | 0.3482040749802483 | 0.1850212063922269 |
| 0.1526970061058001 | 0.0137854671569424 | 0.2859743152119872 |
| 0.3205450000000027 | 0.096559999999966  | 0.0195900000000009 |
| 0.1543194379092150 | 0.2647825827098840 | 0.1241131375972899 |
| 0.4853766047203194 | 0.4283282401917566 | 0.2247408999436074 |
| 0.2367330000000010 | 0.1800539999999984 | 0.0814719999999980 |
| 0.0691199097968827 | 0.3465602667182007 | 0.1814751590110955 |
| 0.4022274854564538 | 0.0131705285163552 | 0.2855455553693554 |
| 0.3205450000000027 | 0.346559999999966  | 0.0195900000000009 |
| 0.1545895144194694 | 0.0155148037591451 | 0.1240093588629244 |
| 0.4852104991403567 | 0.1776057883388699 | 0.2236666826492385 |
| 0.2367330000000010 | 0.4300550000000030 | 0.0814719999999980 |
| 0.0701995112716659 | 0.0974629786588043 | 0.1817454364378921 |
| 0.4045073683376131 | 0.2533990229292642 | 0.2847001747912350 |
| 0.5705460000000002 | 0.3465610000000012 | 0.0195900000000009 |
| 0.9029808787988148 | 0.0135212651362652 | 0.1238345067311526 |
| 0.7363290460503761 | 0.1802209086588623 | 0.2241957434053219 |
| 0.9867330000000010 | 0.4300550000000030 | 0.0814719999999980 |
| 0.8195903100322687 | 0.0968000088146318 | 0.1817122552094581 |



|                    |                    |                    |
|--------------------|--------------------|--------------------|
| 0.6548020820421525 | 0.2627181337696481 | 0.2865477775433890 |
| 0.5705460000000002 | 0.0965599999999966 | 0.0195900000000009 |
| 0.9032852899859424 | 0.2629078904952611 | 0.1236905279994837 |
| 0.7389709125106542 | 0.4313914954495177 | 0.2229298522197296 |
| 0.9867330000000010 | 0.1800550000000030 | 0.0814719999999980 |
| 0.8196424683957566 | 0.3469310834936781 | 0.1811459186653511 |
| 0.6539129758776269 | 0.0166777567130973 | 0.2868811320822541 |
| 0.8205460000000002 | 0.0965599999999966 | 0.0195900000000009 |
| 0.6531332248729390 | 0.2629589877381405 | 0.1237130314923045 |
| 0.9849765756094135 | 0.4314498680427688 | 0.2228525923715643 |
| 0.7367330000000010 | 0.1800539999999984 | 0.0814719999999980 |
| 0.5698355070331219 | 0.3466540814193705 | 0.1815476219349305 |
| 0.9026902240153820 | 0.0133240858124222 | 0.2854413616210629 |
| 0.8205460000000002 | 0.3465599999999966 | 0.0195900000000009 |
| 0.6532997113766134 | 0.0131346448808936 | 0.1237968093842905 |
| 0.9848725482634172 | 0.1775544353716875 | 0.2236729243213982 |
| 0.7367330000000010 | 0.4300550000000030 | 0.0814719999999980 |
| 0.5694856798676253 | 0.0967306097813096 | 0.1816513421831443 |
| 0.8995817472655436 | 0.2629888443591976 | 0.2865730053257433 |
| 0.0705460000000002 | 0.8465610000000012 | 0.0195900000000009 |
| 0.4035965197004303 | 0.5136318131294583 | 0.1241827508640920 |
| 0.2381537264007575 | 0.6798098836655475 | 0.2241684469635379 |

0.486733000000010 0.930055000000030 0.081471999999980  
0.3205824061965735 0.5969257872273029 0.1836505013219804  
0.1521675748104642 0.7636176593418561 0.2850478961510040  
0.070546000000002 0.596561000000012 0.019590000000009  
0.4043498344916679 0.7631105334597001 0.1239319427410553  
0.2357043989248679 0.9295144659270939 0.2233826838126506  
0.486733000000010 0.680053999999984 0.081471999999980  
0.3196189246023755 0.8467914087108928 0.1814967164005098  
0.1361102645499813 0.5125449887306390 0.2815679696792512  
0.320545000000027 0.596561000000012 0.019590000000009  
0.1549035713782849 0.7637141501511753 0.1238344708397694  
0.4859260297888759 0.9310564969075122 0.2240155649448710  
0.236733000000010 0.680055000000030 0.081471999999980  
0.0702320332499339 0.8479512073689980 0.1811648092034891  
0.320545000000027 0.846561000000012 0.019590000000009  
0.1544326288170349 0.5128937192036193 0.1239255141824135  
0.4866473303158871 0.6806563720947567 0.2264371804968166  
0.236733000000010 0.930055000000030 0.081471999999980  
0.0699961370499846 0.5975861570037245 0.1801886440997251  
0.4037888400565688 0.7711019725215411 0.2854185010608676  
0.570546000000002 0.846561000000012 0.019590000000009  
0.9034889709096511 0.5133801931744995 0.1237206217498265

0.7341733996961304 0.6796835085783482 0.2242553644513907  
0.9867330000000010 0.9300550000000030 0.0814719999999980  
0.8200177484269152 0.5976596662312513 0.1801567471918812  
0.6589429815637365 0.7714317889894113 0.2853801308358616  
0.5705460000000002 0.5965610000000012 0.0195900000000009  
0.9024479073551352 0.7637341612908614 0.1237967283297990  
0.7376934678620332 0.9311783177285541 0.2240661639595775  
0.9867330000000010 0.6800550000000030 0.0814719999999980  
0.8196365021553920 0.8469949998134285 0.1814791200472544  
0.6681857015239189 0.5127415369282948 0.2815269549159428  
0.8205460000000002 0.5965610000000012 0.0195900000000009  
0.6524209005512440 0.7632598066324325 0.1239246336285117  
0.9866482104455351 0.9297329030937350 0.2234606975383154  
0.7367330000000010 0.6800550000000030 0.0814719999999980  
0.5697079284205787 0.8469382051638004 0.1823199936359155  
0.9039158905364898 0.5161143683245019 0.2839817956303429  
0.8205460000000002 0.8465610000000012 0.0195900000000009  
0.6520235686043883 0.5129641304077982 0.1239837785711746  
0.9889833422827186 0.6849866550666244 0.2221971739123910  
0.7367330000000010 0.9300550000000030 0.0814719999999980  
0.5688319967083508 0.5970610979871287 0.1837186805990190  
0.9028934332745111 0.7636233061413706 0.2849820407465413

0.4249044563039452 0.5572497749130879 0.3204243931307257  
0.4758275740467045 0.4734093753990458 0.3101123795964061  
0.2894371754819839 0.4740853665188641 0.3100427209551267  
0.4036389999999983 0.2633080000000021 0.0542870000000022  
0.2383988878853653 0.4310809486123098 0.1542276093830108  
0.0682976565105994 0.0947977160495882 0.2510109678222360  
0.4036389999999983 0.0133080000000021 0.0542870000000022  
0.2377593304996604 0.1828151154885824 0.1537735866516492  
0.0609285488757840 0.3430742466214043 0.2504275508893528  
0.1536389999999983 0.0133080000000021 0.0542870000000022  
0.4865323575952177 0.1805207852467607 0.1527928008204797  
0.3203568686172041 0.3491020864856638 0.2584735527634943  
0.1536389999999983 0.2633080000000021 0.0542870000000022  
0.4855818582338716 0.4312212259406639 0.1543302080258320  
0.3186311504586999 0.0943827923049100 0.2509978561123922  
0.9036389999999983 0.2633080000000021 0.0542870000000022  
0.7359175680159679 0.4296150359582962 0.1523754133927059  
0.5694310036769682 0.0969781278398598 0.2515207882727612  
0.9036389999999983 0.0133080000000021 0.0542870000000022  
0.7363444641099475 0.1798332790377095 0.1526091740812529  
0.5740750830559852 0.3429957306395985 0.2505387628584883  
0.6536389999999983 0.0133080000000021 0.0542870000000022

|                    |                    |                    |
|--------------------|--------------------|--------------------|
| 0.9868072029811621 | 0.1804110493347416 | 0.1527533630846165 |
| 0.8198324965942776 | 0.3476298193676594 | 0.2510158061548193 |
| 0.6536389999999983 | 0.2633080000000021 | 0.0542870000000022 |
| 0.9866913733443506 | 0.4295727301406512 | 0.1523470466567188 |
| 0.8194281301697228 | 0.0971161259197471 | 0.2516213991327231 |
| 0.4036389999999983 | 0.7633080000000021 | 0.0542870000000022 |
| 0.2373927475279442 | 0.9311667476648557 | 0.1525664386349702 |
| 0.0679677683980243 | 0.5995782912741657 | 0.2490154810070581 |
| 0.4036389999999983 | 0.5133080000000021 | 0.0542870000000022 |
| 0.2379819622188116 | 0.6796741898553929 | 0.1529525946484817 |
| 0.0702227168939830 | 0.8481661966916749 | 0.2509842689635886 |
| 0.1536389999999983 | 0.5133080000000021 | 0.0542870000000022 |
| 0.4862720895714691 | 0.6794947092191453 | 0.1537873737248647 |
| 0.3188213571367041 | 0.8480552705742530 | 0.2509083542299789 |
| 0.1536389999999983 | 0.7633080000000021 | 0.0542870000000022 |
| 0.4868513872953095 | 0.9296135822270458 | 0.1529921656320905 |
| 0.3185103729059596 | 0.5964132282309326 | 0.2555062862389126 |
| 0.9036389999999983 | 0.7633080000000021 | 0.0542870000000022 |
| 0.7358437951954321 | 0.9298023090776474 | 0.1529524903960224 |
| 0.5697662231504763 | 0.5965126421080278 | 0.2556386185643177 |
| 0.9036389999999983 | 0.5133080000000021 | 0.0542870000000022 |
| 0.7348316104471192 | 0.6799723283247333 | 0.1529455860346487 |

|                    |                    |                    |
|--------------------|--------------------|--------------------|
| 0.5725150959013606 | 0.8531673334081938 | 0.2516817315016349 |
| 0.6536389999999983 | 0.5133080000000021 | 0.0542870000000022 |
| 0.9870820385005988 | 0.6811797105416216 | 0.1519507120749231 |
| 0.8212368956124824 | 0.8480869426521226 | 0.2508558553541103 |
| 0.6536389999999983 | 0.7633080000000021 | 0.0542870000000022 |
| 0.9868353510317194 | 0.9311030517812895 | 0.1525211180493224 |
| 0.8239304463854972 | 0.5995110962849853 | 0.2489475308560553 |

TiH<sub>1.97</sub>-NO<sub>2</sub>

|                     |                     |                     |
|---------------------|---------------------|---------------------|
| 10.1930359999999993 | -5.9205420000000002 | 0.0221310000000000  |
| 0.0000000000000000  | 11.7965890000000009 | -0.0158720000000000 |
| 0.0000000000000000  | 0.0000000000000000  | 27.2903899999999986 |

|    |   |   |    |
|----|---|---|----|
| H  | N | O | Ti |
| 96 | 1 | 2 | 48 |

Selective dynamics

Direct

|                    |                    |                    |
|--------------------|--------------------|--------------------|
| 0.0705460000000002 | 0.3465610000000012 | 0.0195900000000009 |
| 0.4040375928205859 | 0.0139365369742579 | 0.1238243732273458 |
| 0.2331520524418375 | 0.1731710814946190 | 0.2227294533383707 |
| 0.4867330000000010 | 0.4300550000000030 | 0.0814719999999980 |
| 0.3198404004533534 | 0.0967515409199365 | 0.1813797079695842 |
| 0.1537282966541418 | 0.2634031248461804 | 0.2847385929512942 |

|                    |                    |                    |
|--------------------|--------------------|--------------------|
| 0.0705460000000002 | 0.0965599999999966 | 0.0195900000000009 |
| 0.4044193049956004 | 0.2648295191243148 | 0.1239369249338438 |
| 0.2373832435020395 | 0.4338659043695081 | 0.2257325551932705 |
| 0.4867330000000010 | 0.1800550000000030 | 0.0814719999999980 |
| 0.3196623455416675 | 0.3467727021428509 | 0.1800495696334179 |
| 0.1529800082659898 | 0.0140261316563998 | 0.2859777380722753 |
| 0.3205450000000027 | 0.0965599999999966 | 0.0195900000000009 |
| 0.1541926623904171 | 0.2647822277250412 | 0.1239309171520491 |
| 0.4893281593839359 | 0.4337293561155635 | 0.2257614192784338 |
| 0.2367330000000010 | 0.1800539999999984 | 0.0814719999999980 |
| 0.0699344748660360 | 0.3477990825868219 | 0.1818861082058510 |
| 0.4037561541664175 | 0.0151884169355836 | 0.2857624361416944 |
| 0.3205450000000027 | 0.3465599999999966 | 0.0195900000000009 |
| 0.1533522348061903 | 0.0129450032868915 | 0.1237886157038014 |
| 0.4863002467287984 | 0.1804948874924825 | 0.2239850752098838 |
| 0.2367330000000010 | 0.4300550000000030 | 0.0814719999999980 |
| 0.0696037627026044 | 0.0966994513414298 | 0.1813772665749006 |
| 0.4015993480017148 | 0.2632951342841393 | 0.2847375471776238 |
| 0.5705460000000002 | 0.3465610000000012 | 0.0195900000000009 |
| 0.9036934489432435 | 0.0139675959796586 | 0.1238127423238583 |
| 0.7373218816680951 | 0.1817418951544320 | 0.2241476490375670 |
| 0.9867330000000010 | 0.4300550000000030 | 0.0814719999999980 |

|                    |                    |                    |
|--------------------|--------------------|--------------------|
| 0.8204289859337206 | 0.0980941113719504 | 0.1815604551135233 |
| 0.6537725164758863 | 0.2647939511442852 | 0.2861890816937164 |
| 0.5705460000000002 | 0.0965599999999966 | 0.0195900000000009 |
| 0.9040654746551984 | 0.2642484855798267 | 0.1238453631528840 |
| 0.7373183185413613 | 0.4310555299539168 | 0.2242753894582841 |
| 0.9867330000000010 | 0.1800550000000030 | 0.0814719999999980 |
| 0.8201943458005772 | 0.3478165338906630 | 0.1817949615303402 |
| 0.6543530955220414 | 0.0168039073506700 | 0.2854521096497986 |
| 0.8205460000000002 | 0.0965599999999966 | 0.0195900000000009 |
| 0.6540335995025188 | 0.2643257504634335 | 0.1238461125617305 |
| 0.9865351513319918 | 0.4310478451843114 | 0.2242895371927378 |
| 0.7367330000000010 | 0.1800539999999984 | 0.0814719999999980 |
| 0.5704391009712196 | 0.3478278672636432 | 0.1818881803081705 |
| 0.9034459666173601 | 0.0151227234480800 | 0.2857156703200002 |
| 0.8205460000000002 | 0.3465599999999966 | 0.0195900000000009 |
| 0.6540888275455709 | 0.0143101885772400 | 0.1237856734129086 |
| 0.9871596893267027 | 0.1804811895586318 | 0.2240028470364707 |
| 0.7367330000000010 | 0.4300550000000030 | 0.0814719999999980 |
| 0.5703342144331195 | 0.0981467287836071 | 0.1815619644887214 |
| 0.9029807853699918 | 0.2648896413704329 | 0.2861502338276752 |
| 0.0705460000000002 | 0.8465610000000012 | 0.0195900000000009 |
| 0.4038773384574335 | 0.5141198324313934 | 0.1243977495852443 |



0.2393272670232140 0.6799174807157586 0.2260586295627273  
0.4867330000000010 0.9300550000000030 0.0814719999999980  
0.3203618779708253 0.5970921505271436 0.1835904447117164  
0.1536834503576506 0.7649662992230142 0.2855160564257126  
0.0705460000000002 0.5965610000000012 0.0195900000000009  
0.4044869868060694 0.7633218030334150 0.1243468875864198  
0.2354769491172672 0.9315802464100464 0.2235032912392146  
0.4867330000000010 0.6800539999999984 0.0814719999999980  
0.3204420721983789 0.8476708414933525 0.1813916348055671  
0.1425683772965784 0.5099303323794399 0.2863437410977174  
0.3205450000000027 0.5965610000000012 0.0195900000000009  
0.1541150604818813 0.7628894667006790 0.1240307077572950  
0.4870642254739587 0.9337370785245249 0.2236620372496554  
0.2367330000000010 0.6800550000000030 0.0814719999999980  
0.0700351489008395 0.8474075614462462 0.1815820166373036  
0.3952538422513083 0.4986426359602595 0.2756062079128657  
0.3205450000000027 0.8465610000000012 0.0195900000000009  
0.1539045063790452 0.5141437064507806 0.1240317441679771  
0.4860621804081662 0.6792694743100014 0.2289125110555409  
0.2367330000000010 0.9300550000000030 0.0814719999999980  
0.0705567951830574 0.5976483571259817 0.1818011885236186  
0.4085406249741521 0.7799279406392386 0.2835077119975675

0.5705460000000002 0.8465610000000012 0.0195900000000009  
0.9037536166469210 0.5137790777748612 0.1238377130486948  
0.7335102248930466 0.6797591026632787 0.2260323168272979  
0.9867330000000010 0.9300550000000030 0.0814719999999980  
0.8197188687274778 0.5977102976154522 0.1818433160044775  
0.6631254824972291 0.7796782492382148 0.2834481372079260  
0.5705460000000002 0.5965610000000012 0.0195900000000009  
0.9025129757902428 0.7628465216230857 0.1240312622789213  
0.7396568642316235 0.9336830634689511 0.2236681821800564  
0.9867330000000010 0.6800550000000030 0.0814719999999980  
0.8198436003675090 0.8475720175508942 0.1814120437098058  
0.6591059563127973 0.5097814180519288 0.2864168764414604  
0.8205460000000002 0.5965610000000012 0.0195900000000009  
0.6525509708007157 0.7632596196684084 0.1243233816264187  
0.9890906046496184 0.9314549567465225 0.2235339957900012  
0.7367330000000010 0.6800550000000030 0.0814719999999980  
0.5701086391796873 0.8475770660991871 0.1816472501878652  
0.9035554150626771 0.5150114895513654 0.2853942064801255  
0.8205460000000002 0.8465610000000012 0.0195900000000009  
0.6539034383494720 0.5141155424906916 0.1240678570764408  
0.9871656377387767 0.6815788904373530 0.2241124388768368  
0.7367330000000010 0.9300550000000030 0.0814719999999980

|                    |                    |                    |
|--------------------|--------------------|--------------------|
| 0.5692432096547345 | 0.5971093648232483 | 0.1836205411419759 |
| 0.9033853216664185 | 0.7649459164935171 | 0.2855041309908336 |
| 0.4439399547224624 | 0.5958664166347789 | 0.3593697968809744 |
| 0.5374744796340967 | 0.5987982820881411 | 0.3343722943821779 |
| 0.3536675973414913 | 0.5990536156881463 | 0.3343368552361887 |
| 0.4036389999999983 | 0.2633080000000021 | 0.0542870000000022 |
| 0.2372859737997213 | 0.4323480994405134 | 0.1535085689008969 |
| 0.0691958187669628 | 0.0964119590521038 | 0.2512280234646103 |
| 0.4036389999999983 | 0.0133080000000021 | 0.0542870000000022 |
| 0.2365170506388947 | 0.1797272363781897 | 0.1522094252546913 |
| 0.0685669441831680 | 0.3463080911836018 | 0.2512896422655702 |
| 0.1536389999999983 | 0.0133080000000021 | 0.0542870000000022 |
| 0.4871203767015732 | 0.1809499798145908 | 0.1526791204031802 |
| 0.3156873872820631 | 0.3391884487098390 | 0.2480032182905288 |
| 0.1536389999999983 | 0.2633080000000021 | 0.0542870000000022 |
| 0.4881429299322437 | 0.4324134408407862 | 0.1535167392632280 |
| 0.3197389436296058 | 0.0964087717024883 | 0.2512643827948289 |
| 0.9036389999999983 | 0.2633080000000021 | 0.0542870000000022 |
| 0.7369397926041096 | 0.4310168897048908 | 0.1529806654578947 |
| 0.5706946870459693 | 0.0997563323546314 | 0.2513170266194611 |
| 0.9036389999999983 | 0.0133080000000021 | 0.0542870000000022 |
| 0.7372174112643549 | 0.1812691742841095 | 0.1527174247739028 |

|                    |                    |                    |
|--------------------|--------------------|--------------------|
| 0.5702099759721502 | 0.3462527910154812 | 0.2513301607980715 |
| 0.6536389999999983 | 0.0133080000000021 | 0.0542870000000022 |
| 0.9870677072108492 | 0.1809043368470641 | 0.1527072207967733 |
| 0.8198877069121701 | 0.3476100090980250 | 0.2514488199914082 |
| 0.6536389999999983 | 0.2633080000000021 | 0.0542870000000022 |
| 0.9871645145612286 | 0.4309347885343109 | 0.1529310123095142 |
| 0.8214798308710337 | 0.0997913557800281 | 0.2513073442261654 |
| 0.4036389999999983 | 0.7633080000000021 | 0.0542870000000022 |
| 0.2368596157960223 | 0.9302241118728620 | 0.1525938446876442 |
| 0.0700255022192598 | 0.5984686272663572 | 0.2510676567932846 |
| 0.4036389999999983 | 0.5133080000000021 | 0.0542870000000022 |
| 0.2379272478356583 | 0.6800393428351477 | 0.1535755598985372 |
| 0.0703264547412610 | 0.8479779722001103 | 0.2513888285791752 |
| 0.1536389999999983 | 0.5133080000000021 | 0.0542870000000022 |
| 0.4860751384613453 | 0.6790316920938121 | 0.1546786525068084 |
| 0.3194050300262141 | 0.8504293697101718 | 0.2504483168602681 |
| 0.1536389999999983 | 0.7633080000000021 | 0.0542870000000022 |
| 0.4874034081429200 | 0.9309168109981393 | 0.1527388508631541 |
| 0.3201740781367462 | 0.5984907642833600 | 0.2596951441944544 |
| 0.9036389999999983 | 0.7633080000000021 | 0.0542870000000022 |
| 0.7367842565086338 | 0.9307983678586514 | 0.1527349667107015 |
| 0.5707193120763906 | 0.5983776097169307 | 0.2595599603288309 |

|                    |                    |                    |
|--------------------|--------------------|--------------------|
| 0.903638999999983  | 0.513308000000021  | 0.054287000000022  |
| 0.7352341879060076 | 0.6800239727710958 | 0.1535620072377499 |
| 0.5723864376855851 | 0.8524708859330455 | 0.2503889185837114 |
| 0.653638999999983  | 0.513308000000021  | 0.054287000000022  |
| 0.9868141821510248 | 0.6804142906094730 | 0.1527390598677413 |
| 0.8233029142504604 | 0.8501676394278653 | 0.2504542985955756 |
| 0.653638999999983  | 0.763308000000021  | 0.054287000000022  |
| 0.9864958382175768 | 0.9301823283522189 | 0.1525797440747518 |
| 0.8206167337225745 | 0.5982927113325145 | 0.2511670257850866 |

TiH<sub>1.97</sub>-Hv-NO<sub>2</sub>H

|                    |                    |                    |
|--------------------|--------------------|--------------------|
| 10.193035999999993 | -5.920542000000002 | 0.022131000000000  |
| 0.000000000000000  | 11.796589000000009 | -0.015872000000000 |
| 0.000000000000000  | 0.000000000000000  | 27.290389999999986 |

|    |   |   |    |
|----|---|---|----|
| H  | N | O | Ti |
| 96 | 1 | 2 | 48 |

Selective dynamics

Direct

|                    |                    |                    |
|--------------------|--------------------|--------------------|
| 0.070546000000002  | 0.346561000000012  | 0.019590000000009  |
| 0.4037597388245290 | 0.0136586035900759 | 0.1239001188003040 |
| 0.2385407121330142 | 0.1862819460942947 | 0.2260686800582234 |
| 0.486733000000010  | 0.430055000000030  | 0.081471999999980  |

|                    |                    |                    |
|--------------------|--------------------|--------------------|
| 0.3193340157726455 | 0.0978083673342992 | 0.1818896642270957 |
| 0.1403425518398625 | 0.2573060943856952 | 0.2843741765983693 |
| 0.0705460000000002 | 0.0965599999999966 | 0.0195900000000009 |
| 0.4033643933411434 | 0.2642633014943127 | 0.1241228160110828 |
| 0.2309674653518158 | 0.4274295782617226 | 0.2246528886399480 |
| 0.4867330000000010 | 0.1800550000000030 | 0.0814719999999980 |
| 0.3198355006030267 | 0.3491330112713584 | 0.1845698247906143 |
| 0.1521104075183139 | 0.0142124812300106 | 0.2858752458814285 |
| 0.3205450000000027 | 0.0965599999999966 | 0.0195900000000009 |
| 0.1535338224361888 | 0.2641373816154417 | 0.1240294549665721 |
| 0.4849414734608166 | 0.4275871297564993 | 0.2247730380893065 |
| 0.2367330000000010 | 0.1800539999999984 | 0.0814719999999980 |
| 0.0679491429821054 | 0.3461506518842564 | 0.1812938120481374 |
| 0.4014271743153326 | 0.0129889988298840 | 0.2856370064268134 |
| 0.3205450000000027 | 0.3465599999999966 | 0.0195900000000009 |
| 0.1544417597417121 | 0.0153314914913992 | 0.1240049811620785 |
| 0.4850635495621928 | 0.1778000318177047 | 0.2240895506049281 |
| 0.2367330000000010 | 0.4300550000000030 | 0.0814719999999980 |
| 0.0696982781911298 | 0.0975620375925541 | 0.1817606892838960 |
| 0.4029041231667350 | 0.2589127414256047 | 0.2847119963923908 |
| 0.5705460000000002 | 0.3465610000000012 | 0.0195900000000009 |
| 0.9028557567111429 | 0.0132448843084791 | 0.1238442416729679 |

|                    |                    |                    |
|--------------------|--------------------|--------------------|
| 0.7347569479639851 | 0.1787400653548562 | 0.2240507928176369 |
| 0.986733000000010  | 0.430055000000030  | 0.081471999999980  |
| 0.8184059683193731 | 0.0956821597217632 | 0.1816162246314627 |
| 0.6529927846724223 | 0.2608672885741670 | 0.2866223266730401 |
| 0.570546000000002  | 0.096559999999966  | 0.019590000000009  |
| 0.9026328906504354 | 0.2628087842591770 | 0.1237408380380886 |
| 0.7376393428674423 | 0.4309517063219790 | 0.2236576203622660 |
| 0.986733000000010  | 0.180055000000030  | 0.081471999999980  |
| 0.8184680138581319 | 0.3461815493558387 | 0.1813529046810595 |
| 0.6505950826733252 | 0.0115014614307132 | 0.2863203581095404 |
| 0.820546000000002  | 0.096559999999966  | 0.019590000000009  |
| 0.6528292070721847 | 0.2629461480256060 | 0.1238115725430717 |
| 0.9829388866085401 | 0.4308927146847805 | 0.2232285082252369 |
| 0.736733000000010  | 0.180053999999984  | 0.081471999999980  |
| 0.5692464142898654 | 0.3465222309546946 | 0.1818915360520788 |
| 0.9014931262881846 | 0.0129821992060852 | 0.2856685987968018 |
| 0.820546000000002  | 0.346559999999966  | 0.019590000000009  |
| 0.6527232302264275 | 0.0125205282810189 | 0.1237779326470541 |
| 0.9825821229095980 | 0.1762133981300144 | 0.2235403341770098 |
| 0.736733000000010  | 0.430055000000030  | 0.081471999999980  |
| 0.5686576111810843 | 0.0959886267756166 | 0.1817655912479632 |
| 0.8966716966755305 | 0.2604154446875289 | 0.2865449412971438 |

0.0705460000000002 0.8465610000000012 0.0195900000000009  
0.4031609287952708 0.5133659966578007 0.1240804090244017  
0.2346327805531376 0.6804533032880196 0.2238473634575612  
0.4867330000000010 0.9300550000000030 0.0814719999999980  
0.3190962654174554 0.5967492315144100 0.1827440592218067  
0.1511837521017094 0.7631914891086747 0.2858235000349144  
0.0705460000000002 0.5965610000000012 0.0195900000000009  
0.4033829706503740 0.7627098319779204 0.1239606447987321  
0.2363816971682246 0.9301147814233719 0.2240154864601572  
0.4867330000000010 0.6800539999999984 0.0814719999999980  
0.3189684817040085 0.8466142687456779 0.1818538695315307  
0.1403171640477244 0.5098195463716325 0.2846636529215424  
0.3205450000000027 0.5965610000000012 0.0195900000000009  
0.1541390831956670 0.7638634605179420 0.1239007518395313  
0.4850108163924386 0.9288225203664253 0.2242011043838290  
0.2367330000000010 0.6800550000000030 0.0814719999999980  
0.0699138379244316 0.8474595605544564 0.1814775841524664  
0.3205450000000027 0.8465610000000012 0.0195900000000009  
0.1533992136523932 0.5127706396351480 0.1239235284667444  
0.4828195808042980 0.6748122814466755 0.2271312435964092  
0.2367330000000010 0.9300550000000030 0.0814719999999980  
0.0689293876688683 0.5967595442701192 0.1812938190581780



|                    |                    |                    |
|--------------------|--------------------|--------------------|
| 0.4021257037514538 | 0.7648051150480117 | 0.2864089252087548 |
| 0.5705460000000002 | 0.8465610000000012 | 0.0195900000000009 |
| 0.9029126167832153 | 0.5134467991594168 | 0.1238263653170392 |
| 0.7394337619697953 | 0.6817739996267930 | 0.2233021328875381 |
| 0.9867330000000010 | 0.9300550000000030 | 0.0814719999999980 |
| 0.8199953814824638 | 0.5969774028332339 | 0.1811356922087659 |
| 0.6554563029529441 | 0.7665776518928271 | 0.2859772636308187 |
| 0.5705460000000002 | 0.5965610000000012 | 0.0195900000000009 |
| 0.9035437127442338 | 0.7639016280039369 | 0.1238084642463348 |
| 0.7351216764638098 | 0.9285097003514264 | 0.2241228762932252 |
| 0.9867330000000010 | 0.6800550000000030 | 0.0814719999999980 |
| 0.8199467606469432 | 0.8470368800052525 | 0.1815384900550285 |
| 0.6605639370195854 | 0.5140290056143064 | 0.2843770993108803 |
| 0.8205460000000002 | 0.5965610000000012 | 0.0195900000000009 |
| 0.6524709876316407 | 0.7626143266849836 | 0.1238920523552985 |
| 0.9864627337392521 | 0.9299366067713463 | 0.2237956471947181 |
| 0.7367330000000010 | 0.6800550000000030 | 0.0814719999999980 |
| 0.5687681947750858 | 0.8459863015567104 | 0.1820792127640166 |
| 0.9016095779447744 | 0.5130641950686053 | 0.2853452261561972 |
| 0.8205460000000002 | 0.8465610000000012 | 0.0195900000000009 |
| 0.6520669610613778 | 0.5128356233742698 | 0.1239577372442318 |
| 0.9876244234023620 | 0.6825376781091712 | 0.2233440245037825 |

0.736733000000010 0.930055000000030 0.081471999999980  
0.5696726264268290 0.5971826467618601 0.1823307635016854  
0.9033222481213382 0.7637559171223448 0.2855805761996585  
0.4992982761405778 0.5192509510239603 0.3760279245730592  
0.4470804333451892 0.4980447528611993 0.3086035096045467  
0.3228021974096555 0.4849668223661435 0.3100703582929467  
0.4682119051573015 0.4464663601736661 0.3526121230383941  
0.403638999999983 0.263308000000021 0.054287000000022  
0.2374101072668596 0.4305302431045040 0.1537175050385316  
0.0679003213832878 0.0957685636081073 0.2510515719058243  
0.403638999999983 0.013308000000021 0.054287000000022  
0.2371745108010518 0.1825652026702938 0.1537618262316876  
0.0574701631574409 0.3410773017116989 0.2502658158907602  
0.153638999999983 0.013308000000021 0.054287000000022  
0.4862067867671833 0.1805171902108794 0.1529561023662671  
0.3202956388328578 0.3544823881714976 0.2574105818896047  
0.153638999999983 0.263308000000021 0.054287000000022  
0.4852133263582676 0.4306902512417650 0.1539143821864258  
0.3180297354390182 0.0962119590629193 0.2511403065937986  
0.903638999999983 0.263308000000021 0.054287000000022  
0.7356567242068770 0.4296293939279376 0.1526501276727896  
0.5684372642737611 0.0949494431221159 0.2514981018889718

|                    |                    |                    |
|--------------------|--------------------|--------------------|
| 0.903638999999983  | 0.013308000000021  | 0.054287000000022  |
| 0.7354273128363452 | 0.1790037914927496 | 0.1526436854109457 |
| 0.5724671358063934 | 0.3428922109743194 | 0.2511158127340880 |
| 0.653638999999983  | 0.013308000000021  | 0.054287000000022  |
| 0.9860829454591818 | 0.1800923937031561 | 0.1527200881743531 |
| 0.8177587840054285 | 0.3459244803032481 | 0.2512023969144927 |
| 0.653638999999983  | 0.263308000000021  | 0.054287000000022  |
| 0.9855143986316717 | 0.4295798211387888 | 0.1524891789984507 |
| 0.8165287557626829 | 0.0945624012474386 | 0.2513917449790349 |
| 0.403638999999983  | 0.763308000000021  | 0.054287000000022  |
| 0.2370452916767959 | 0.9310273204631901 | 0.1528000426214761 |
| 0.0673785953842595 | 0.5971889579738632 | 0.2507741039795010 |
| 0.403638999999983  | 0.513308000000021  | 0.054287000000022  |
| 0.2364206272015222 | 0.6795503672410579 | 0.1528861332970101 |
| 0.0699567138325721 | 0.8477697084706859 | 0.2511580323473696 |
| 0.153638999999983  | 0.513308000000021  | 0.054287000000022  |
| 0.4859327445761991 | 0.6793807210952721 | 0.1535715749630254 |
| 0.3183908348210953 | 0.8466646633637802 | 0.2516054815758115 |
| 0.153638999999983  | 0.763308000000021  | 0.054287000000022  |
| 0.4860127350361935 | 0.9294677837093547 | 0.1529022130435974 |
| 0.3130187740377300 | 0.5960473978235998 | 0.2531043624203397 |
| 0.903638999999983  | 0.763308000000021  | 0.054287000000022  |

|                    |                    |                    |
|--------------------|--------------------|--------------------|
| 0.7356360851965303 | 0.9293444318218188 | 0.1527759597198973 |
| 0.5758736862388628 | 0.5986231798457052 | 0.2528293999146513 |
| 0.9036389999999983 | 0.5133080000000021 | 0.0542870000000022 |
| 0.7364308030805159 | 0.6800514508626367 | 0.1526432063963033 |
| 0.5681500493292581 | 0.8458001560898608 | 0.2513535466269745 |
| 0.6536389999999983 | 0.5133080000000021 | 0.0542870000000022 |
| 0.9868088460639203 | 0.6805760165366388 | 0.1524850489673726 |
| 0.8207615511513334 | 0.8477106957119165 | 0.2512583289321514 |
| 0.6536389999999983 | 0.7633080000000021 | 0.0542870000000022 |
| 0.9868785703991659 | 0.9309366474247799 | 0.1526449997702121 |
| 0.8218780604986480 | 0.5981103810534666 | 0.2505523640877635 |

#### TiH<sub>1.97</sub>-NO<sub>2</sub>H

|                     |                     |                     |
|---------------------|---------------------|---------------------|
| 10.1930359999999993 | -5.9205420000000002 | 0.0221310000000000  |
| 0.0000000000000000  | 11.7965890000000009 | -0.0158720000000000 |
| 0.0000000000000000  | 0.0000000000000000  | 27.2903899999999986 |

|    |   |   |    |
|----|---|---|----|
| H  | N | O | Ti |
| 97 | 1 | 2 | 48 |

#### Selective dynamics

##### Direct

|                    |                    |                    |
|--------------------|--------------------|--------------------|
| 0.0705460000000002 | 0.3465610000000012 | 0.0195900000000009 |
| 0.4034116187741696 | 0.0121858305093388 | 0.1238800950955526 |

0.2297405923355474 0.1671659344869532 0.2217795566339802  
0.4867330000000010 0.4300550000000030 0.0814719999999980  
0.3181453021655520 0.0941903833698089 0.1808478807445770  
0.1516999669305192 0.2592028282261638 0.2845519628024782  
0.0705460000000002 0.0965599999999966 0.0195900000000009  
0.4035655997135870 0.2629621587476149 0.1238008548593196  
0.2385698160707800 0.4321097582301884 0.2260692806266780  
0.4867330000000010 0.1800550000000030 0.0814719999999980  
0.3176958906157427 0.3438838511633032 0.1793409914683426  
0.1503651662805092 0.0098095332661501 0.2854362344288184  
0.3205450000000027 0.0965599999999966 0.0195900000000009  
0.1526114932597645 0.2627815841945434 0.1238800339008864  
0.4856129224156747 0.4288176645462558 0.2244793206807293  
0.2367330000000010 0.1800539999999984 0.0814719999999980  
0.0685385255415164 0.3454563421458841 0.1817673183638911  
0.4001018652601102 0.0104570221028516 0.2851209930909571  
0.3205450000000027 0.3465599999999966 0.0195900000000009  
0.1519509070324652 0.0109497456697423 0.1236346670922122  
0.4841984819411842 0.1781019069180160 0.2238868989112377  
0.2367330000000010 0.4300550000000030 0.0814719999999980  
0.0680392157553640 0.0940939578419080 0.1808539823507972  
0.3980539428488348 0.2579877461912483 0.2846478552903645

0.5705460000000002 0.3465610000000012 0.0195900000000009  
0.9016400244725612 0.0118205532843098 0.1238864794972983  
0.7352954362194957 0.1791346844074450 0.2242833086259479  
0.9867330000000010 0.4300550000000030 0.0814719999999980  
0.8184471074823199 0.0956930179081746 0.1816268055180458  
0.6507911525617828 0.2614321170956956 0.2862259323608007  
0.5705460000000002 0.0965599999999966 0.0195900000000009  
0.9027020189727819 0.2625608477048176 0.1238418330774833  
0.7342491480337098 0.4276261621086194 0.2246827186214074  
0.9867330000000010 0.1800550000000030 0.0814719999999980  
0.8184469861476631 0.3457402315778909 0.1821119279397404  
0.6558070691730770 0.0214525920731661 0.2858375386172088  
0.8205460000000002 0.0965599999999966 0.0195900000000009  
0.6530539659602438 0.2627102119069992 0.1238433248834494  
0.9848667695524305 0.4275756199536556 0.2245475294470773  
0.7367330000000010 0.1800539999999984 0.0814719999999980  
0.5684621787878255 0.3455444732398962 0.1819712519298224  
0.9011149238891168 0.0106910941667636 0.2850208961339193  
0.8205460000000002 0.3465599999999966 0.0195900000000009  
0.6529394591383777 0.0128221166346104 0.1239361655761094  
0.9854285845537161 0.1774403784454696 0.2237250326252202  
0.7367330000000010 0.4300550000000030 0.0814719999999980

|                    |                    |                    |
|--------------------|--------------------|--------------------|
| 0.5690058669674021 | 0.0957987847567345 | 0.1817132823584551 |
| 0.9019417072109511 | 0.2615428740266278 | 0.2855387320494424 |
| 0.0705460000000002 | 0.8465610000000012 | 0.0195900000000009 |
| 0.4030239119002634 | 0.5133320799529830 | 0.1244468594044617 |
| 0.2383166867635340 | 0.6745311725831454 | 0.2264258963328869 |
| 0.4867330000000010 | 0.9300550000000030 | 0.0814719999999980 |
| 0.3175572845768007 | 0.5945774854323078 | 0.1826380577518773 |
| 0.1518959243732256 | 0.7621220238473686 | 0.2851742235153223 |
| 0.0705460000000002 | 0.5965610000000012 | 0.0195900000000009 |
| 0.4028864865732986 | 0.7617651688995658 | 0.1244253348118068 |
| 0.2310690448376901 | 0.9294393756071356 | 0.2223341428628669 |
| 0.4867330000000010 | 0.6800539999999984 | 0.0814719999999980 |
| 0.3185851277026752 | 0.8449962184250581 | 0.1803371970532962 |
| 0.1437359833681048 | 0.5067685859150886 | 0.2856534309265956 |
| 0.3205450000000027 | 0.5965610000000012 | 0.0195900000000009 |
| 0.1519836207300255 | 0.7605451457075185 | 0.1239876051452614 |
| 0.4863849915904228 | 0.9283348488961418 | 0.2250235564117369 |
| 0.2367330000000010 | 0.6800550000000030 | 0.0814719999999980 |
| 0.0682873322085579 | 0.8447074558321584 | 0.1811185098001982 |
| 0.3966078646118664 | 0.4799446179128530 | 0.2802794670917298 |
| 0.3205450000000027 | 0.8465610000000012 | 0.0195900000000009 |
| 0.1520634016170763 | 0.5118856460820773 | 0.1240074192396728 |

0.4823585529168249 0.6790530028932058 0.2248313555191876  
0.2367330000000010 0.9300550000000030 0.0814719999999980  
0.0684995269179762 0.5948941644459160 0.1820274770332488  
0.3941427193068273 0.7759771806124699 0.2811779865288704  
0.5705460000000002 0.8465610000000012 0.0195900000000009  
0.9020591113942895 0.5114371664175156 0.1238860637079610  
0.7312739919644088 0.6754645553460433 0.2252774332836245  
0.9867330000000010 0.9300550000000030 0.0814719999999980  
0.8175861452005543 0.5949394785249020 0.1822051581663405  
0.6696235969837357 0.7658435336577119 0.2788850664984596  
0.5705460000000002 0.5965610000000012 0.0195900000000009  
0.9009721971930542 0.7603756350890428 0.1239100991178071  
0.7342174425260033 0.9277250058036739 0.2253338456324516  
0.9867330000000010 0.6800550000000030 0.0814719999999980  
0.8183024391347553 0.8451751400898490 0.1804433818268234  
0.6512009031754323 0.5091090037770754 0.2865965551830955  
0.8205460000000002 0.5965610000000012 0.0195900000000009  
0.6511397901552427 0.7615407075977940 0.1245095531548717  
0.9905091793080680 0.9294637364411875 0.2224857432245574  
0.7367330000000010 0.6800550000000030 0.0814719999999980  
0.5689596026273285 0.8463017196482483 0.1830690603309073  
0.9014580504748114 0.5117951498098443 0.2858988627871400



|                    |                    |                    |
|--------------------|--------------------|--------------------|
| 0.8205460000000002 | 0.8465610000000012 | 0.0195900000000009 |
| 0.6525901770537608 | 0.5121636764660161 | 0.1239999606628866 |
| 0.9834315818500022 | 0.6765264267789770 | 0.2243139766753600 |
| 0.7367330000000010 | 0.9300550000000030 | 0.0814719999999980 |
| 0.5673790154677619 | 0.5948938354484522 | 0.1836313767403561 |
| 0.9014857855616173 | 0.7619464411839079 | 0.2853744898621445 |
| 0.4889825676246000 | 0.8084600784497622 | 0.3515806676395937 |
| 0.4802946260660063 | 0.6515932833470228 | 0.3180218671811222 |
| 0.5585382028087803 | 0.8011887530399698 | 0.3344007568496933 |
| 0.3597368960906950 | 0.6008390219098196 | 0.3347561052190077 |
| 0.4036389999999983 | 0.2633080000000021 | 0.0542870000000022 |
| 0.2355027608579414 | 0.4300945931903047 | 0.1532897410091335 |
| 0.0670479125038541 | 0.0928276993009633 | 0.2507184231872941 |
| 0.4036389999999983 | 0.0133080000000021 | 0.0542870000000022 |
| 0.2351892890959263 | 0.1774138236846424 | 0.1517716578775513 |
| 0.0680377522204737 | 0.3429976885731268 | 0.2510087168314697 |
| 0.1536389999999983 | 0.0133080000000021 | 0.0542870000000022 |
| 0.4861275257609328 | 0.1790683571245959 | 0.1526854570730526 |
| 0.3124814575072189 | 0.3322140598603461 | 0.2470112793778367 |
| 0.1536389999999983 | 0.2633080000000021 | 0.0542870000000022 |
| 0.4863580872457550 | 0.4300837680398591 | 0.1531311352527681 |
| 0.3172526570619585 | 0.0925906830834173 | 0.2507782702239242 |

|                    |                    |                    |
|--------------------|--------------------|--------------------|
| 0.903638999999983  | 0.263308000000021  | 0.054287000000022  |
| 0.7352265515283061 | 0.4288905473507085 | 0.1531468642630515 |
| 0.5677376024461656 | 0.0968581195932864 | 0.2511519077831684 |
| 0.903638999999983  | 0.013308000000021  | 0.054287000000022  |
| 0.7359540408540153 | 0.1795454480048881 | 0.1529053788489882 |
| 0.5671048709937206 | 0.3432031579376795 | 0.2516628066005511 |
| 0.653638999999983  | 0.013308000000021  | 0.054287000000022  |
| 0.9853386833340184 | 0.1785994608426343 | 0.1525615526936892 |
| 0.8179715257620206 | 0.3451328039659392 | 0.2517591416233992 |
| 0.653638999999983  | 0.263308000000021  | 0.054287000000022  |
| 0.9853988482975190 | 0.4287009001874873 | 0.1531072891826072 |
| 0.8199242603968160 | 0.0963957930833527 | 0.2509393874921276 |
| 0.403638999999983  | 0.763308000000021  | 0.054287000000022  |
| 0.2353015738739074 | 0.9279253463832265 | 0.1521103048070490 |
| 0.0674953845605351 | 0.5949404254647019 | 0.2513100891724034 |
| 0.403638999999983  | 0.513308000000021  | 0.054287000000022  |
| 0.2355698535889789 | 0.6772135517612088 | 0.1534925834947319 |
| 0.0676057154806409 | 0.8434263473297691 | 0.2510587659314680 |
| 0.153638999999983  | 0.513308000000021  | 0.054287000000022  |
| 0.4846527646334121 | 0.6786892858483176 | 0.1551678459147462 |
| 0.3142346127093841 | 0.8478694056392453 | 0.2484523592512467 |
| 0.153638999999983  | 0.763308000000021  | 0.054287000000022  |

|                    |                    |                    |
|--------------------|--------------------|--------------------|
| 0.4867326466784468 | 0.9287461975967330 | 0.1531991946780830 |
| 0.3234997098938726 | 0.5953756226741752 | 0.2622221128195582 |
| 0.9036389999999983 | 0.7633080000000021 | 0.0542870000000022 |
| 0.7343034037004540 | 0.9286414254682408 | 0.1532208954196586 |
| 0.5638617526109438 | 0.5943425206537064 | 0.2563172451401270 |
| 0.9036389999999983 | 0.5133080000000021 | 0.0542870000000022 |
| 0.7336762480974705 | 0.6776639900345133 | 0.1534805568031634 |
| 0.5700676104522822 | 0.8489768704125628 | 0.2569313206361004 |
| 0.6536389999999983 | 0.5133080000000021 | 0.0542870000000022 |
| 0.9846920350917961 | 0.6776717283977963 | 0.1528863757807195 |
| 0.8252724678164041 | 0.8473703596594783 | 0.2486903921400112 |
| 0.6536389999999983 | 0.7633080000000021 | 0.0542870000000022 |
| 0.9848736683435814 | 0.9276912970305147 | 0.1521393742791514 |
| 0.8174763591129540 | 0.5943381610351703 | 0.2517750038810963 |

TiH<sub>1.97</sub>-Hv-NO

|                     |                     |                     |
|---------------------|---------------------|---------------------|
| 10.1930359999999993 | -5.9205420000000002 | 0.0221310000000000  |
| 0.0000000000000000  | 11.7965890000000009 | -0.0158720000000000 |
| 0.0000000000000000  | 0.0000000000000000  | 27.2903899999999986 |

|    |   |   |    |
|----|---|---|----|
| H  | N | O | Ti |
| 95 | 1 | 1 | 48 |

Selective dynamics

Direct

|                    |                    |                    |
|--------------------|--------------------|--------------------|
| 0.0705460000000002 | 0.3465610000000012 | 0.0195900000000009 |
| 0.4043087867598946 | 0.0137693130340386 | 0.1239719830196328 |
| 0.2391012640188870 | 0.1831232838169554 | 0.2253363672401549 |
| 0.4867330000000010 | 0.4300550000000030 | 0.0814719999999980 |
| 0.3203922663759633 | 0.0979611816838903 | 0.1824450607547702 |
| 0.1424157754387188 | 0.2537697494862755 | 0.2836839046272168 |
| 0.0705460000000002 | 0.0965599999999966 | 0.0195900000000009 |
| 0.4037698495296131 | 0.2638078979902668 | 0.1240797561451428 |
| 0.2338567365824661 | 0.4288604463004916 | 0.2246336159472060 |
| 0.4867330000000010 | 0.1800550000000030 | 0.0814719999999980 |
| 0.3191395226791333 | 0.3475685795097181 | 0.1832834450951613 |
| 0.1535750218016035 | 0.0142557296243862 | 0.2859879697842941 |
| 0.3205450000000027 | 0.0965599999999966 | 0.0195900000000009 |
| 0.1538437392880004 | 0.2638969416083483 | 0.1240253183761947 |
| 0.4859443704222188 | 0.4273526852619186 | 0.2239380333125723 |
| 0.2367330000000010 | 0.1800539999999984 | 0.0814719999999980 |
| 0.0689288151442335 | 0.3464949629711200 | 0.1816761548972363 |
| 0.4037658329031664 | 0.0139751208186722 | 0.2860862201475828 |
| 0.3205450000000027 | 0.3465599999999966 | 0.0195900000000009 |
| 0.1552982540832713 | 0.0145554090163504 | 0.1239937953119376 |
| 0.4867626397716262 | 0.1793879047577392 | 0.2243812205069985 |

0.236733000000010 0.430055000000030 0.081471999999980  
0.0701013829756244 0.0971263845307795 0.1813038691679239  
0.4064512164763195 0.2641665499136724 0.2866989239055145  
0.570546000000002 0.346561000000012 0.019590000000009  
0.9037279234335094 0.0133099474187475 0.1238260814826372  
0.7370052694668877 0.1806276064749900 0.2244499647457981  
0.986733000000010 0.430055000000030 0.081471999999980  
0.8197307550391084 0.0968642225091215 0.1816665677480441  
0.6544284569201291 0.2633266426525579 0.2864542781096218  
0.570546000000002 0.096559999999966 0.019590000000009  
0.9033415032530651 0.2633257574984305 0.1237482273205558  
0.7390465414678571 0.4317890823426402 0.2239494988232867  
0.986733000000010 0.180055000000030 0.081471999999980  
0.8197725072900883 0.3471001687681811 0.1816935589967557  
0.6542524077872479 0.0157323282785439 0.2864751447694832  
0.820546000000002 0.096559999999966 0.019590000000009  
0.6534522599938910 0.2635083514894911 0.1239041606116822  
0.9856259626812656 0.4315363421210750 0.2235887917820346  
0.736733000000010 0.180053999999984 0.081471999999980  
0.5701133465005682 0.3470097631399881 0.1817347582677928  
0.9039372426838526 0.0140472196178042 0.2854004041598479  
0.820546000000002 0.346559999999966 0.019590000000009

|                    |                    |                    |
|--------------------|--------------------|--------------------|
| 0.6534953119725678 | 0.0133757670798489 | 0.1238939700285215 |
| 0.9855854491916609 | 0.1780754116980410 | 0.2236324665941923 |
| 0.7367330000000010 | 0.4300550000000030 | 0.0814719999999980 |
| 0.5697947261048162 | 0.0969617667992856 | 0.1818835039036151 |
| 0.9000753533358020 | 0.2623921848373341 | 0.2869240012575728 |
| 0.0705460000000002 | 0.8465610000000012 | 0.0195900000000009 |
| 0.4034257661291945 | 0.5133312832319414 | 0.1240342166887066 |
| 0.2389608148364114 | 0.6795612785996301 | 0.2252932330616237 |
| 0.4867330000000010 | 0.9300550000000030 | 0.0814719999999980 |
| 0.3193353416457836 | 0.5956238574457678 | 0.1832917980161965 |
| 0.1535858873694604 | 0.7638604447072371 | 0.2860797354900459 |
| 0.0705460000000002 | 0.5965610000000012 | 0.0195900000000009 |
| 0.4038364013849426 | 0.7632268132653846 | 0.1240362520760558 |
| 0.2397555149456751 | 0.9318594876111993 | 0.2247677448651746 |
| 0.4867330000000010 | 0.6800539999999984 | 0.0814719999999980 |
| 0.3204264309909868 | 0.8465039736081517 | 0.1824108064174413 |
| 0.1426246155858080 | 0.5134754805013648 | 0.2837941055521885 |
| 0.3205450000000027 | 0.5965610000000012 | 0.0195900000000009 |
| 0.1553412374468273 | 0.7638243163592294 | 0.1240351120684154 |
| 0.4865994760590341 | 0.9313993377242203 | 0.2243233446824937 |
| 0.2367330000000010 | 0.6800550000000030 | 0.0814719999999980 |
| 0.0713767466499018 | 0.8476262210275356 | 0.1816510017856958 |

0.3205450000000027 0.8465610000000012 0.0195900000000009  
0.1539136885821308 0.5131648490032857 0.1240472668631570  
0.4859546568710980 0.6827245266441330 0.2239205687347419  
0.2367330000000010 0.9300550000000030 0.0814719999999980  
0.0702678268585057 0.5970446623383133 0.1813391786661356  
0.4064093716904644 0.7669338604683409 0.2866135900244613  
0.5705460000000002 0.8465610000000012 0.0195900000000009  
0.9037013446491318 0.5135893626623195 0.1238538036103745  
0.7410244218685486 0.6824321181002283 0.2236275861470458  
0.9867330000000010 0.9300550000000030 0.0814719999999980  
0.8212112492342428 0.5977402078916793 0.1813313699544441  
0.6588585212382558 0.7686585293709585 0.2840768473735117  
0.5705460000000002 0.5965610000000012 0.0195900000000009  
0.9047527140620963 0.7639034615572552 0.1238116966437999  
0.7390596908711168 0.9313562967432710 0.2238877085268607  
0.9867330000000010 0.6800550000000030 0.0814719999999980  
0.8211679762475755 0.8475833480278866 0.1812822517864913  
0.6588773824230856 0.5154152426213593 0.2840862783779737  
0.8205460000000002 0.5965610000000012 0.0195900000000009  
0.6531261181656502 0.7631558440676939 0.1239036537298049  
0.9884446865676427 0.9291139826010273 0.2234563625756949  
0.7367330000000010 0.6800550000000030 0.0814719999999980

0.5701429877766885 0.8472418146511158 0.1816851474539421  
0.9040685953661683 0.5147012856848742 0.2855242995330473  
0.8205460000000002 0.8465610000000012 0.0195900000000009  
0.6529367239739864 0.5131610911328724 0.1239378949714201  
0.9883963238757766 0.6830622919086548 0.2234482759535223  
0.7367330000000010 0.9300550000000030 0.0814719999999980  
0.5708931085919670 0.5975959965154415 0.1806555817129900  
0.9057932749869849 0.7653477266892696 0.2854308963682343  
0.4307314190297372 0.5276933114089324 0.2948038001777995  
0.3082765940850151 0.4661753949127725 0.3130456584208515  
0.4036389999999983 0.2633080000000021 0.0542870000000022  
0.2375022312528500 0.4305405724164862 0.1536423235879317  
0.0690637311525711 0.0946641090629566 0.2504767198022139  
0.4036389999999983 0.0133080000000021 0.0542870000000022  
0.2374199014128817 0.1816447656779168 0.1534144419170735  
0.0620063976840872 0.3432923643606482 0.2510189507312073  
0.1536389999999983 0.0133080000000021 0.0542870000000022  
0.4867340633152282 0.1805512479475457 0.1530460714401246  
0.3184274537612806 0.3491574119802378 0.2550226152258511  
0.1536389999999983 0.2633080000000021 0.0542870000000022  
0.4855880166987888 0.4303998106563136 0.1536339511434154  
0.3209992792238525 0.0986576355388946 0.2522113019967597



|                    |                    |                    |
|--------------------|--------------------|--------------------|
| 0.903638999999983  | 0.263308000000021  | 0.054287000000022  |
| 0.7366977113229887 | 0.4303138361203336 | 0.1528256769301135 |
| 0.5702901464883184 | 0.0972593303945853 | 0.2516956119717290 |
| 0.903638999999983  | 0.013308000000021  | 0.054287000000022  |
| 0.7367490803279289 | 0.1803078545118666 | 0.1527149682542626 |
| 0.5731418174870302 | 0.3452868714959719 | 0.2509539611788584 |
| 0.653638999999983  | 0.013308000000021  | 0.054287000000022  |
| 0.9863397264926762 | 0.1802244469477625 | 0.1526601656859618 |
| 0.8204873004765528 | 0.3477592275401115 | 0.2515243575100878 |
| 0.653638999999983  | 0.263308000000021  | 0.054287000000022  |
| 0.9863502402167476 | 0.4297838509836824 | 0.1526919978925474 |
| 0.8202858646724750 | 0.0971281419500249 | 0.2514771424969316 |
| 0.403638999999983  | 0.763308000000021  | 0.054287000000022  |
| 0.2382923884873857 | 0.9309266358039565 | 0.1531643560166107 |
| 0.0689754010974936 | 0.5986191479600038 | 0.2505449347770586 |
| 0.403638999999983  | 0.513308000000021  | 0.054287000000022  |
| 0.2377175385884237 | 0.6794272784284743 | 0.1534580718260360 |
| 0.0723396182587240 | 0.8481446037139214 | 0.2513092089669458 |
| 0.153638999999983  | 0.513308000000021  | 0.054287000000022  |
| 0.4857749341703130 | 0.6791057249784703 | 0.1535098452909803 |
| 0.3207156979935161 | 0.8463838742917462 | 0.2521709770021971 |
| 0.153638999999983  | 0.763308000000021  | 0.054287000000022  |

|                    |                    |                    |
|--------------------|--------------------|--------------------|
| 0.4867432998149682 | 0.9298833712962237 | 0.1530262848654534 |
| 0.3183750255096538 | 0.5933835530857682 | 0.2550073888315571 |
| 0.9036389999999983 | 0.7633080000000021 | 0.0542870000000022 |
| 0.7367313162163189 | 0.9301611048275419 | 0.1528018628101927 |
| 0.5724805939200466 | 0.5985925719405264 | 0.2516845819540792 |
| 0.9036389999999983 | 0.5133080000000021 | 0.0542870000000022 |
| 0.7379627873932694 | 0.6808236072684456 | 0.1525262792137620 |
| 0.5730555524578174 | 0.8523840154350528 | 0.2508752131538207 |
| 0.6536389999999983 | 0.5133080000000021 | 0.0542870000000022 |
| 0.9879682379937665 | 0.6807406503775268 | 0.1525571392893790 |
| 0.8232117722599382 | 0.8485542741971193 | 0.2508634439845215 |
| 0.6536389999999983 | 0.7633080000000021 | 0.0542870000000022 |
| 0.9879782425730429 | 0.9306764735855689 | 0.1525173316242619 |
| 0.8233967828676093 | 0.5992170835338247 | 0.2509171416312991 |

TiH<sub>1.97</sub>-NO

|                     |                     |                     |
|---------------------|---------------------|---------------------|
| 10.1930359999999993 | -5.9205420000000002 | 0.0221310000000000  |
| 0.0000000000000000  | 11.7965890000000009 | -0.0158720000000000 |
| 0.0000000000000000  | 0.0000000000000000  | 27.2903899999999986 |

|    |   |   |    |
|----|---|---|----|
| H  | N | O | Ti |
| 96 | 1 | 1 | 48 |

Selective dynamics

Direct

|                    |                    |                    |
|--------------------|--------------------|--------------------|
| 0.0705460000000002 | 0.3465610000000012 | 0.0195900000000009 |
| 0.4048434659057626 | 0.0136056003300630 | 0.1238296846067506 |
| 0.2336875054046363 | 0.1729377595016023 | 0.2221831286406834 |
| 0.4867330000000010 | 0.4300550000000030 | 0.0814719999999980 |
| 0.3201712707530135 | 0.0968293323248574 | 0.1809345995511903 |
| 0.1545256003325863 | 0.2628737140262077 | 0.2848181141225083 |
| 0.0705460000000002 | 0.0965599999999966 | 0.0195900000000009 |
| 0.4049190738346853 | 0.2641146601358436 | 0.1238382139948140 |
| 0.2405726902381441 | 0.4356198744119958 | 0.2264294310272005 |
| 0.4867330000000010 | 0.1800550000000030 | 0.0814719999999980 |
| 0.3193123929851263 | 0.3465973595326494 | 0.1799327759981702 |
| 0.1537532299798687 | 0.0137537199650382 | 0.2854695800139573 |
| 0.3205450000000027 | 0.0965599999999966 | 0.0195900000000009 |
| 0.1532428609111224 | 0.2634405586707611 | 0.1238648334325429 |
| 0.4900753418228444 | 0.4344464316432743 | 0.2247813316824210 |
| 0.2367330000000010 | 0.1800539999999984 | 0.0814719999999980 |
| 0.0695240845791199 | 0.3467111161817793 | 0.1820406872163955 |
| 0.4019581878969904 | 0.0133391144231575 | 0.2844655999054787 |
| 0.3205450000000027 | 0.3465599999999966 | 0.0195900000000009 |
| 0.1537771090682518 | 0.0132678133192896 | 0.1235909239332616 |
| 0.4880471055922470 | 0.1807223357259804 | 0.2243204047419686 |

|                    |                    |                    |
|--------------------|--------------------|--------------------|
| 0.236733000000010  | 0.430055000000030  | 0.081471999999980  |
| 0.0701911303303801 | 0.0966236368506485 | 0.1809631894780725 |
| 0.4016350370257138 | 0.2620254486417059 | 0.2845281270774385 |
| 0.570546000000002  | 0.346561000000012  | 0.019590000000009  |
| 0.9024620300407592 | 0.0129708047559020 | 0.1238252231352795 |
| 0.7377343018121389 | 0.1798650379961315 | 0.2247647232355433 |
| 0.986733000000010  | 0.430055000000030  | 0.081471999999980  |
| 0.8196058573685270 | 0.0962862760948488 | 0.1820628027482915 |
| 0.6533010435661907 | 0.2633109155356712 | 0.2861208544739135 |
| 0.570546000000002  | 0.096559999999966  | 0.019590000000009  |
| 0.9031191688048515 | 0.2632182678089618 | 0.1238886750029755 |
| 0.7375768856737622 | 0.4307834564195005 | 0.2248047327560384 |
| 0.986733000000010  | 0.180055000000030  | 0.081471999999980  |
| 0.8194664434520739 | 0.3464829481695931 | 0.1821986196137784 |
| 0.6557819258537194 | 0.0160585420145212 | 0.2862223332727086 |
| 0.820546000000002  | 0.096559999999966  | 0.019590000000009  |
| 0.6545483048092884 | 0.2636852176701890 | 0.1239945604379809 |
| 0.9867780039397686 | 0.4298457736216698 | 0.2245491026570986 |
| 0.736733000000010  | 0.180053999999984  | 0.081471999999980  |
| 0.5701221320699078 | 0.3475004303202404 | 0.1821480186256784 |
| 0.9045170432148077 | 0.0123906856858013 | 0.2851911926397581 |
| 0.820546000000002  | 0.346559999999966  | 0.019590000000009  |

|                    |                    |                    |
|--------------------|--------------------|--------------------|
| 0.6537188301018669 | 0.0133437402340929 | 0.1239420332743547 |
| 0.9871388060027825 | 0.1798083906924732 | 0.2238873844024696 |
| 0.7367330000000010 | 0.4300550000000030 | 0.0814719999999980 |
| 0.5702969676579694 | 0.0963620684109318 | 0.1819682792864784 |
| 0.9035551307337456 | 0.2630792147819086 | 0.2860059237586360 |
| 0.0705460000000002 | 0.8465610000000012 | 0.0195900000000009 |
| 0.4033857718252102 | 0.5136729876898716 | 0.1242982428666329 |
| 0.2406363737314616 | 0.6779894349655605 | 0.2264559246904927 |
| 0.4867330000000010 | 0.9300550000000030 | 0.0814719999999980 |
| 0.3175230888153696 | 0.5954792300701710 | 0.1816979773736186 |
| 0.1548444870567051 | 0.7650896343703214 | 0.2848131584914577 |
| 0.0705460000000002 | 0.5965610000000012 | 0.0195900000000009 |
| 0.4034172393832471 | 0.7626385944570977 | 0.1242487856787675 |
| 0.2334673378825900 | 0.9336189963323830 | 0.2221018267482253 |
| 0.4867330000000010 | 0.6800539999999984 | 0.0814719999999980 |
| 0.3195070037708465 | 0.8463735637140302 | 0.1798404001234629 |
| 0.1438956454755958 | 0.5088573440298032 | 0.2865836329526834 |
| 0.3205450000000027 | 0.5965610000000012 | 0.0195900000000009 |
| 0.1532198943153067 | 0.7624851352320957 | 0.1239084505251087 |
| 0.4900042856201625 | 0.9287934443607770 | 0.2245827190170650 |
| 0.2367330000000010 | 0.6800550000000030 | 0.0814719999999980 |
| 0.0701714995530162 | 0.8469158583241497 | 0.1810785041061278 |

|                    |                    |                    |
|--------------------|--------------------|--------------------|
| 0.4047537942126017 | 0.4800565017200623 | 0.2849093089200426 |
| 0.3205450000000027 | 0.8465610000000012 | 0.0195900000000009 |
| 0.1524477295668066 | 0.5125898285529737 | 0.1239025429473619 |
| 0.4807738844249506 | 0.6769981073150507 | 0.2221416928607366 |
| 0.2367330000000010 | 0.9300550000000030 | 0.0814719999999980 |
| 0.0694934763475523 | 0.5962059321154565 | 0.1819451245762738 |
| 0.4047659712792781 | 0.7986828801876942 | 0.2847332037230481 |
| 0.5705460000000002 | 0.8465610000000012 | 0.0195900000000009 |
| 0.9030422852609954 | 0.5126086444519105 | 0.1239282921997308 |
| 0.7344935894433428 | 0.6789438037116945 | 0.2252466162207915 |
| 0.9867330000000010 | 0.9300550000000030 | 0.0814719999999980 |
| 0.8194655504380520 | 0.5968084282256100 | 0.1821261440671179 |
| 0.6821853143221044 | 0.7779495399700923 | 0.2820735552173426 |
| 0.5705460000000002 | 0.5965610000000012 | 0.0195900000000009 |
| 0.9022767212713613 | 0.7620527714700094 | 0.1238675330872842 |
| 0.7346250012708411 | 0.9283217546578455 | 0.2251213703580012 |
| 0.9867330000000010 | 0.6800550000000030 | 0.0814719999999980 |
| 0.8205216563725874 | 0.8470076283269182 | 0.1798713052314674 |
| 0.6557519097862337 | 0.5137148079989973 | 0.2864391902184630 |
| 0.8205460000000002 | 0.5965610000000012 | 0.0195900000000009 |
| 0.6520538252037255 | 0.7624630963230532 | 0.1244648038347574 |
| 0.9953016484181278 | 0.9338351696328193 | 0.2221132402446226 |

|                    |                    |                    |
|--------------------|--------------------|--------------------|
| 0.736733000000010  | 0.680055000000030  | 0.081471999999980  |
| 0.5692675368221685 | 0.8459153900127940 | 0.1834137750607591 |
| 0.9037708599682325 | 0.5140938766109803 | 0.2860173805765278 |
| 0.820546000000002  | 0.846561000000012  | 0.019590000000009  |
| 0.6535046861443465 | 0.5131178057031176 | 0.1240408146040250 |
| 0.9870533517111474 | 0.6803493598262416 | 0.2238821087851401 |
| 0.736733000000010  | 0.930055000000030  | 0.081471999999980  |
| 0.5690259227731128 | 0.5969799270007790 | 0.1834783490115232 |
| 0.9044547814240983 | 0.7655282719100307 | 0.2853410607257588 |
| 0.4896884890991208 | 0.6821554939704864 | 0.3044872514057680 |
| 0.3735401450049354 | 0.6239739123121476 | 0.3303009788986540 |
| 0.403638999999983  | 0.263308000000021  | 0.054287000000022  |
| 0.2357291799558143 | 0.4306366002180935 | 0.1531522167846018 |
| 0.0703178560797749 | 0.0965898518264967 | 0.2508601205059964 |
| 0.403638999999983  | 0.013308000000021  | 0.054287000000022  |
| 0.2370101098410231 | 0.1797802014977037 | 0.1519949935631955 |
| 0.0691740687581446 | 0.3450669180024361 | 0.2514322069210579 |
| 0.153638999999983  | 0.013308000000021  | 0.054287000000022  |
| 0.4879534603471601 | 0.1805424838264760 | 0.1528452325975579 |
| 0.3170690958024059 | 0.3387664815160338 | 0.2478114250980495 |
| 0.153638999999983  | 0.263308000000021  | 0.054287000000022  |
| 0.4872659477395413 | 0.4312496722610579 | 0.1532926171817616 |

|                    |                    |                    |
|--------------------|--------------------|--------------------|
| 0.3200871208438011 | 0.0965305508458083 | 0.2507545494601951 |
| 0.9036389999999983 | 0.2633080000000021 | 0.0542870000000022 |
| 0.7365063800640114 | 0.4303960774833898 | 0.1533023523184074 |
| 0.5707542980385336 | 0.0976258447054035 | 0.2514156117566716 |
| 0.9036389999999983 | 0.0133080000000021 | 0.0542870000000022 |
| 0.7366934816251099 | 0.1794070762433276 | 0.1532230998942289 |
| 0.5707719908994707 | 0.3467081268856498 | 0.2517291497059182 |
| 0.6536389999999983 | 0.0133080000000021 | 0.0542870000000022 |
| 0.9862156943335735 | 0.1798686805875716 | 0.1526422590812509 |
| 0.8202900414203019 | 0.3468645875343417 | 0.2518582863755569 |
| 0.6536389999999983 | 0.2633080000000021 | 0.0542870000000022 |
| 0.9862054146614307 | 0.4295834034430437 | 0.1531512637859169 |
| 0.8220196381378441 | 0.0970453641797655 | 0.2514843385433573 |
| 0.4036389999999983 | 0.7633080000000021 | 0.0542870000000022 |
| 0.2368946029432183 | 0.9302701168824092 | 0.1520013065450191 |
| 0.0689359163067191 | 0.5974139848167693 | 0.2512647754853893 |
| 0.4036389999999983 | 0.5133080000000021 | 0.0542870000000022 |
| 0.2358842941362395 | 0.6781856923232735 | 0.1531168732944309 |
| 0.0705023573150125 | 0.8467918073274681 | 0.2510957364483895 |
| 0.1536389999999983 | 0.5133080000000021 | 0.0542870000000022 |
| 0.4851457722544659 | 0.6793215554945260 | 0.1549208005852303 |
| 0.3170924103422236 | 0.8519250628334337 | 0.2477149187721456 |



|                    |                    |                    |
|--------------------|--------------------|--------------------|
| 0.153638999999983  | 0.763308000000021  | 0.054287000000022  |
| 0.4875997849752345 | 0.9294475834665289 | 0.1531320386147378 |
| 0.3238963777453138 | 0.5985879247440421 | 0.2625583825803572 |
| 0.903638999999983  | 0.763308000000021  | 0.054287000000022  |
| 0.7350448969368654 | 0.9294024023150124 | 0.1533377900478633 |
| 0.5665127942622252 | 0.6009984680030834 | 0.2579079007306226 |
| 0.903638999999983  | 0.513308000000021  | 0.054287000000022  |
| 0.7348706172946169 | 0.6788842711178820 | 0.1533935069427255 |
| 0.5665023860917923 | 0.8391862254694422 | 0.2578740624562030 |
| 0.653638999999983  | 0.513308000000021  | 0.054287000000022  |
| 0.9862100840187032 | 0.6794804061754771 | 0.1527367244286910 |
| 0.8296830554049707 | 0.8513687873466218 | 0.2477691504072868 |
| 0.653638999999983  | 0.763308000000021  | 0.054287000000022  |
| 0.9870994753373284 | 0.9300027748941136 | 0.1519715794364002 |
| 0.8221780652446696 | 0.5981872423233309 | 0.2516134795477861 |

TiH<sub>1.97</sub>-Hv-NOH

|                    |                    |                    |
|--------------------|--------------------|--------------------|
| 10.193035999999993 | -5.920542000000002 | 0.022131000000000  |
| 0.000000000000000  | 11.796589000000009 | -0.015872000000000 |
| 0.000000000000000  | 0.000000000000000  | 27.290389999999986 |

H    N    O    Ti

96    1    1    48

## Selective dynamics

### Direct

|                    |                    |                    |
|--------------------|--------------------|--------------------|
| 0.0705460000000002 | 0.3465610000000012 | 0.0195900000000009 |
| 0.4040159017892826 | 0.0137019036147253 | 0.1239297497447246 |
| 0.2394978022062661 | 0.1850131449810806 | 0.2255902218647856 |
| 0.4867330000000010 | 0.4300550000000030 | 0.0814719999999980 |
| 0.3199670489906072 | 0.0976807170721710 | 0.1823802316187273 |
| 0.1393284083015619 | 0.2527082327282174 | 0.2834249543528614 |
| 0.0705460000000002 | 0.0965599999999966 | 0.0195900000000009 |
| 0.4037210578830827 | 0.2636893230424804 | 0.1239340458234670 |
| 0.2356192032544412 | 0.4298739943256440 | 0.2241269856611166 |
| 0.4867330000000010 | 0.1800550000000030 | 0.0814719999999980 |
| 0.3205996558823442 | 0.3481704215841912 | 0.1839219716097472 |
| 0.1528483120975659 | 0.0141853171023140 | 0.2859866197517739 |
| 0.3205450000000027 | 0.0965599999999966 | 0.0195900000000009 |
| 0.1544447642193524 | 0.2645974304371644 | 0.1240108244913953 |
| 0.4864662085123658 | 0.4284239488355469 | 0.2245472500443306 |
| 0.2367330000000010 | 0.1800539999999984 | 0.0814719999999980 |
| 0.0694833173563367 | 0.3468375749256928 | 0.1810556554216561 |
| 0.4034139784577265 | 0.0141521735992444 | 0.2860972035832111 |
| 0.3205450000000027 | 0.3465599999999966 | 0.0195900000000009 |
| 0.1551663703319826 | 0.0149179084398431 | 0.1239832402423788 |

0.4863881238445935 0.1795425690452019 0.2243610133427545  
0.2367330000000010 0.4300550000000030 0.0814719999999980  
0.0702512485327355 0.0972559672458506 0.1812440994147489  
0.4068562115154574 0.2629006191996032 0.2870606098391890  
0.5705460000000002 0.3465610000000012 0.0195900000000009  
0.9035200831223648 0.0134140133485279 0.1238174165139950  
0.7364538014501510 0.1805099183465744 0.2240540251454415  
0.9867330000000010 0.4300550000000030 0.0814719999999980  
0.8196162238325506 0.0968778603794255 0.1813761432295632  
0.6547206352846848 0.2633224507410298 0.2867532242042954  
0.5705460000000002 0.0965599999999966 0.0195900000000009  
0.9032851194119961 0.2634004120763055 0.1237115065871249  
0.7386996048707319 0.4320392839563920 0.2237158555530264  
0.9867330000000010 0.1800550000000030 0.0814719999999980  
0.8197152561127413 0.3471456584845469 0.1813572866300394  
0.6543699681754092 0.0161050014528439 0.2868082461538890  
0.8205460000000002 0.0965599999999966 0.0195900000000009  
0.6530727227347392 0.2633925837070609 0.1238247340811528  
0.9852108315955457 0.4320888264282210 0.2232169842267134  
0.7367330000000010 0.1800539999999984 0.0814719999999980  
0.5699025315478523 0.3468240916411200 0.1817943005265218  
0.9033518286931314 0.0139160138853054 0.2852168860583595

0.8205460000000002 0.3465599999999966 0.0195900000000009  
0.6531266434575536 0.0132351802797727 0.1238080167354033  
0.9848889832435143 0.1773226194375316 0.2232203448335459  
0.7367330000000010 0.4300550000000030 0.0814719999999980  
0.5696060837867041 0.0969934279322398 0.1819096379604578  
0.9000078374452970 0.2627088540991110 0.2862584866239572  
0.0705460000000002 0.8465610000000012 0.0195900000000009  
0.4037764129336194 0.5135770446339945 0.1239338329909677  
0.2396463637789397 0.6785297189466204 0.2256881960175635  
0.4867330000000010 0.9300550000000030 0.0814719999999980  
0.3207865323524293 0.5966179479193808 0.1841290796170479  
0.1528864160394963 0.7639382708640140 0.2860560476603937  
0.0705460000000002 0.5965610000000012 0.0195900000000009  
0.4037215423335009 0.7634749588715258 0.1239113362149608  
0.2384960971012309 0.9314635352810193 0.2243987211750369  
0.4867330000000010 0.6800539999999984 0.0814719999999980  
0.3200266239291842 0.8465777373270693 0.1823774733652528  
0.1399436648817254 0.5118479572835410 0.2835060964604685  
0.3205450000000027 0.5965610000000012 0.0195900000000009  
0.1552526253394947 0.7634876207647814 0.1240184236036615  
0.4862281092187412 0.9311932887736309 0.2242869524347452  
0.2367330000000010 0.6800550000000030 0.0814719999999980

0.0707536178725826 0.8474768453876237 0.1815181026638068  
0.3205450000000027 0.8465610000000012 0.0195900000000009  
0.1544989260599572 0.5133213573214629 0.1240127510246445  
0.4862129607657900 0.6820928220952530 0.2245335886334568  
0.2367330000000010 0.9300550000000030 0.0814719999999980  
0.0704111657775863 0.5973100220849277 0.1813167300954814  
0.4067407521328002 0.7690716421732895 0.2868921212862293  
0.5705460000000002 0.8465610000000012 0.0195900000000009  
0.9036241819126327 0.5135245424913190 0.1238227942376408  
0.7415538696609660 0.6827491209848703 0.2228434922885478  
0.9867330000000010 0.9300550000000030 0.0814719999999980  
0.8209233469097406 0.5977042481336883 0.1811767643599379  
0.6576559173067477 0.7674026578826577 0.2846285799150037  
0.5705460000000002 0.5965610000000012 0.0195900000000009  
0.9041145933692609 0.7636904505898527 0.1237857365529996  
0.7386644341630334 0.9310655602811418 0.2236747120218405  
0.9867330000000010 0.6800550000000030 0.0814719999999980  
0.8208086791295728 0.8474683233634046 0.1811684085925192  
0.6580576226873185 0.5156177207623468 0.2846957600880764  
0.8205460000000002 0.5965610000000012 0.0195900000000009  
0.6528655504208123 0.7631655100251535 0.1237771927882130  
0.9874840216579606 0.9290083873296717 0.2233316585276325

|                    |                    |                    |
|--------------------|--------------------|--------------------|
| 0.736733000000010  | 0.680055000000030  | 0.081471999999980  |
| 0.5698045117216620 | 0.8473089212175678 | 0.1817103874248422 |
| 0.9036273760264266 | 0.5145790642169694 | 0.2853038740218048 |
| 0.820546000000002  | 0.846561000000012  | 0.019590000000009  |
| 0.6528562848057016 | 0.5130273390415772 | 0.1237869873438919 |
| 0.9877261060327928 | 0.6828363148391512 | 0.2232886870785052 |
| 0.736733000000010  | 0.930055000000030  | 0.081471999999980  |
| 0.5698721675760270 | 0.5971070845376933 | 0.1807797831605271 |
| 0.9044825333264177 | 0.7649410490844675 | 0.2856874279586210 |
| 0.4735405598040079 | 0.5523762912950015 | 0.3388121891797752 |
| 0.4367872765386185 | 0.5328740054213982 | 0.3037406631545218 |
| 0.2977444950352587 | 0.4596721450557879 | 0.3088090330979589 |
| 0.403638999999983  | 0.263308000000021  | 0.054287000000022  |
| 0.2386653625017505 | 0.4313144514019732 | 0.1537973148042210 |
| 0.0687318320776711 | 0.0946027858354250 | 0.2503344927827648 |
| 0.403638999999983  | 0.013308000000021  | 0.054287000000022  |
| 0.2378350924083221 | 0.1820929031919627 | 0.1535014516116335 |
| 0.0611477451011482 | 0.3428953373523108 | 0.2498782278798366 |
| 0.153638999999983  | 0.013308000000021  | 0.054287000000022  |
| 0.4865134161906415 | 0.1804212805942030 | 0.1530813444331284 |
| 0.3217804875843364 | 0.3501661047461784 | 0.2559984747136361 |
| 0.153638999999983  | 0.263308000000021  | 0.054287000000022  |

|                    |                    |                    |
|--------------------|--------------------|--------------------|
| 0.4856289916853214 | 0.4298952038901008 | 0.1532523233012742 |
| 0.3202379097609335 | 0.0977237371765724 | 0.2520584810292301 |
| 0.9036389999999983 | 0.2633080000000021 | 0.0542870000000022 |
| 0.7363963493994087 | 0.4300534780429882 | 0.1526806403964046 |
| 0.5702695140321028 | 0.0974869623585148 | 0.2517371500840071 |
| 0.9036389999999983 | 0.0133080000000021 | 0.0542870000000022 |
| 0.7361933946806519 | 0.1801139326316346 | 0.1525671548084846 |
| 0.5737321690783350 | 0.3452829137438745 | 0.2512200217606163 |
| 0.6536389999999983 | 0.0133080000000021 | 0.0542870000000022 |
| 0.9867263474091919 | 0.1805102508277778 | 0.1524940404871579 |
| 0.8196499947755396 | 0.3476218133619278 | 0.2511997489665980 |
| 0.6536389999999983 | 0.2633080000000021 | 0.0542870000000022 |
| 0.9868419276862993 | 0.4301407512919975 | 0.1525395070886655 |
| 0.8192939178063354 | 0.0967364932736282 | 0.2512703413313510 |
| 0.4036389999999983 | 0.7633080000000021 | 0.0542870000000022 |
| 0.2378704843156355 | 0.9308106188893120 | 0.1530462989407878 |
| 0.0688786862653261 | 0.5989973216330396 | 0.2504231444344461 |
| 0.4036389999999983 | 0.5133080000000021 | 0.0542870000000022 |
| 0.2381224748728776 | 0.6795139660202962 | 0.1536389372159890 |
| 0.0711421279513663 | 0.8478791193962579 | 0.2512324919090556 |
| 0.1536389999999983 | 0.5133080000000021 | 0.0542870000000022 |
| 0.4855815193559057 | 0.6796536762487158 | 0.1531904707317146 |

|                    |                    |                    |
|--------------------|--------------------|--------------------|
| 0.3199583602836264 | 0.8471104273311265 | 0.2520250263528395 |
| 0.1536389999999983 | 0.7633080000000021 | 0.0542870000000022 |
| 0.4865495815985383 | 0.9299856237027175 | 0.1530611591271961 |
| 0.3216863937701405 | 0.5954880630008483 | 0.2563188094732464 |
| 0.9036389999999983 | 0.7633080000000021 | 0.0542870000000022 |
| 0.7362760847105274 | 0.9300991436855434 | 0.1526588361213979 |
| 0.5753774110630229 | 0.5998102123012496 | 0.2495609918370439 |
| 0.9036389999999983 | 0.5133080000000021 | 0.0542870000000022 |
| 0.7368870410806304 | 0.6803573319170787 | 0.1524585580264232 |
| 0.5736982642966288 | 0.8532454943445713 | 0.2510462216881614 |
| 0.6536389999999983 | 0.5133080000000021 | 0.0542870000000022 |
| 0.9876215116991226 | 0.6805519477250153 | 0.1525314578057023 |
| 0.8222767105438842 | 0.8481836961216507 | 0.2508583256165204 |
| 0.6536389999999983 | 0.7633080000000021 | 0.0542870000000022 |
| 0.9875944266854592 | 0.9307764152108319 | 0.1524887140605808 |
| 0.8227149943564687 | 0.5989436435854569 | 0.2508741024939661 |

TiH<sub>1.97</sub>-NOH

|                     |                     |                     |
|---------------------|---------------------|---------------------|
| 10.1930359999999993 | -5.9205420000000002 | 0.0221310000000000  |
| 0.0000000000000000  | 11.7965890000000009 | -0.0158720000000000 |
| 0.0000000000000000  | 0.0000000000000000  | 27.2903899999999986 |

H N O Ti



## Selective dynamics

## Direct

|                    |                    |                    |
|--------------------|--------------------|--------------------|
| 0.0705460000000002 | 0.3465610000000012 | 0.0195900000000009 |
| 0.4043187346087939 | 0.0137182586913972 | 0.1237919135900406 |
| 0.2334990439065310 | 0.1773706026039605 | 0.2228235414204586 |
| 0.4867330000000010 | 0.4300550000000030 | 0.0814719999999980 |
| 0.3193793782477417 | 0.0983387804199566 | 0.1809614615171868 |
| 0.1536478943603971 | 0.2647929877804742 | 0.2855726908300631 |
| 0.0705460000000002 | 0.0965599999999966 | 0.0195900000000009 |
| 0.4040021986275221 | 0.2641408160789083 | 0.1238393567612990 |
| 0.2425438973681771 | 0.4411093053184442 | 0.2276743703916009 |
| 0.4867330000000010 | 0.1800550000000030 | 0.0814719999999980 |
| 0.3196440170378012 | 0.3478661920935104 | 0.1809349888630297 |
| 0.1522846801818648 | 0.0154991591066233 | 0.2855332654893249 |
| 0.3205450000000027 | 0.0965599999999966 | 0.0195900000000009 |
| 0.1527940774907639 | 0.2646308899808447 | 0.1240475435483061 |
| 0.4864612927060295 | 0.4290440418132280 | 0.2237072712014517 |
| 0.2367330000000010 | 0.1800539999999984 | 0.0814719999999980 |
| 0.0701345863496283 | 0.3481597890902277 | 0.1823896737479589 |
| 0.3997937279400238 | 0.0143543939940469 | 0.2842320661268086 |
| 0.3205450000000027 | 0.3465599999999966 | 0.0195900000000009 |

0.1527790080899273 0.0144874081568633 0.1236734098822719  
0.4862319886781678 0.1814939940368905 0.2239737279999009  
0.2367330000000010 0.4300550000000030 0.0814719999999980  
0.0693933506231875 0.0978911086473142 0.1813894314201726  
0.4019989888409811 0.2639060291157896 0.2852411928977159  
0.5705460000000002 0.3465610000000012 0.0195900000000009  
0.9019616512548118 0.0139593274930222 0.1239302239760404  
0.7363811850125632 0.1810013571726113 0.2248505640854193  
0.9867330000000010 0.4300550000000030 0.0814719999999980  
0.8185946400215846 0.0966368247294370 0.1824465668805551  
0.6525093681301211 0.2644677003477641 0.2865438604136004  
0.5705460000000002 0.0965599999999966 0.0195900000000009  
0.9030791352130894 0.2639943984483454 0.1239669067790859  
0.7367954494324013 0.4311054508073026 0.2244833395984399  
0.9867330000000010 0.1800550000000030 0.0814719999999980  
0.8196127224435603 0.3472283944827874 0.1822605729819884  
0.6530386198591139 0.0179236985707878 0.2868109623530489  
0.8205460000000002 0.0965599999999966 0.0195900000000009  
0.6539897714456538 0.2636792882808904 0.1238552466618244  
0.9864078272618799 0.4311625680589966 0.2247001623354035  
0.7367330000000010 0.1800539999999984 0.0814719999999980  
0.5698394273358534 0.3473402909395011 0.1818156105404887

|                    |                    |                    |
|--------------------|--------------------|--------------------|
| 0.9032711368419363 | 0.0141617224068807 | 0.2857198060249672 |
| 0.8205460000000002 | 0.3465599999999966 | 0.0195900000000009 |
| 0.6538242133563811 | 0.0138829663785389 | 0.1240090481311842 |
| 0.9851751982498135 | 0.1814995168251024 | 0.2246459329184014 |
| 0.7367330000000010 | 0.4300550000000030 | 0.0814719999999980 |
| 0.5698489559177110 | 0.0973334214378134 | 0.1820174971795673 |
| 0.9031804513017671 | 0.2644993979673893 | 0.2856374578487532 |
| 0.0705460000000002 | 0.8465610000000012 | 0.0195900000000009 |
| 0.4036585419946971 | 0.5144647194321396 | 0.1242329060908638 |
| 0.2415479365322721 | 0.6783350220301562 | 0.2271890382590624 |
| 0.4867330000000010 | 0.9300550000000030 | 0.0814719999999980 |
| 0.3191071880420722 | 0.5975108200455520 | 0.1819359273648765 |
| 0.1537831325116957 | 0.7671411550767180 | 0.2844004373769861 |
| 0.0705460000000002 | 0.5965610000000012 | 0.0195900000000009 |
| 0.4034684183122098 | 0.7636307694575883 | 0.1241481008183858 |
| 0.2315285086801178 | 0.9363742265536743 | 0.2218919761881066 |
| 0.4867330000000010 | 0.6800539999999984 | 0.0814719999999980 |
| 0.3189497005965406 | 0.8477424264807368 | 0.1791676543402911 |
| 0.1439306555630283 | 0.5111072818606172 | 0.2864899689096965 |
| 0.3205450000000027 | 0.5965610000000012 | 0.0195900000000009 |
| 0.1534024089740039 | 0.7631606344037020 | 0.1239387109921391 |
| 0.4887569338305623 | 0.9305929783321611 | 0.2246535306364598 |

|                    |                    |                    |
|--------------------|--------------------|--------------------|
| 0.236733000000010  | 0.680055000000030  | 0.081471999999980  |
| 0.0690200982286571 | 0.8481614080860620 | 0.1810653087400831 |
| 0.4070250641161409 | 0.4929046615658164 | 0.2849933745979831 |
| 0.320545000000027  | 0.846561000000012  | 0.019590000000009  |
| 0.1528569880378067 | 0.5131566304486055 | 0.1240228798186208 |
| 0.4805584453594893 | 0.6770078244852524 | 0.2247324836566431 |
| 0.236733000000010  | 0.930055000000030  | 0.081471999999980  |
| 0.0696851677840021 | 0.5973016787918052 | 0.1819251557165597 |
| 0.4007010471808599 | 0.7952573685322489 | 0.2807928069034243 |
| 0.570546000000002  | 0.846561000000012  | 0.019590000000009  |
| 0.9035690334232775 | 0.5134516523244390 | 0.1239240959260434 |
| 0.7381255975282515 | 0.6815784782032220 | 0.2239137674073866 |
| 0.986733000000010  | 0.930055000000030  | 0.081471999999980  |
| 0.8196190935139936 | 0.5972338180204387 | 0.1818574481734108 |
| 0.6709536150458104 | 0.7685083141573346 | 0.2816713225085819 |
| 0.570546000000002  | 0.596561000000012  | 0.019590000000009  |
| 0.9029613373333637 | 0.7634858140877153 | 0.1238535345099367 |
| 0.7323200582853312 | 0.9284399806831339 | 0.2258843758915928 |
| 0.986733000000010  | 0.680055000000030  | 0.081471999999980  |
| 0.8195709141967755 | 0.8472147945681490 | 0.1808828989394534 |
| 0.6537757549570172 | 0.5138166225560353 | 0.2865407300787164 |
| 0.820546000000002  | 0.596561000000012  | 0.019590000000009  |

|                    |                    |                    |
|--------------------|--------------------|--------------------|
| 0.6524194136274584 | 0.7631952086077551 | 0.1243003373555866 |
| 0.9910626667705970 | 0.9344616362144103 | 0.2228573735084581 |
| 0.7367330000000010 | 0.6800550000000030 | 0.0814719999999980 |
| 0.5683847772843672 | 0.8462820936716906 | 0.1838945149053297 |
| 0.9033431767760844 | 0.5154406126516751 | 0.2859289974232419 |
| 0.8205460000000002 | 0.8465610000000012 | 0.0195900000000009 |
| 0.6535949167796190 | 0.5133545631143682 | 0.1238552490669469 |
| 0.9857503131752150 | 0.6815782044578664 | 0.2239975868701042 |
| 0.7367330000000010 | 0.9300550000000030 | 0.0814719999999980 |
| 0.5692945836411069 | 0.5972101908368610 | 0.1820480770636324 |
| 0.9032828042086585 | 0.7653453889978887 | 0.2856711293553879 |
| 0.5391468277869185 | 0.6680230458927907 | 0.3361018061847312 |
| 0.4913880518591329 | 0.7080978389527266 | 0.3173888553340088 |
| 0.3602062179967388 | 0.6396159486007346 | 0.3341356130301544 |
| 0.4036389999999983 | 0.2633080000000021 | 0.0542870000000022 |
| 0.2366056694764430 | 0.4318594333604131 | 0.1535915571456203 |
| 0.0692739251984314 | 0.0985609720510809 | 0.2511361153716449 |
| 0.4036389999999983 | 0.0133080000000021 | 0.0542870000000022 |
| 0.2363651710805222 | 0.1812634711483101 | 0.1522721401210039 |
| 0.0706129212799181 | 0.3483394287079563 | 0.2517020265951164 |
| 0.1536389999999983 | 0.0133080000000021 | 0.0542870000000022 |
| 0.4872450202442697 | 0.1808521760655666 | 0.1527234750682050 |

|                    |                    |                    |
|--------------------|--------------------|--------------------|
| 0.3171189737265362 | 0.3425611925710178 | 0.2494145099504576 |
| 0.1536389999999983 | 0.2633080000000021 | 0.0542870000000022 |
| 0.4870380053644247 | 0.4311943117527254 | 0.1528794659836364 |
| 0.3189247856467474 | 0.0990820878691270 | 0.2508267325276127 |
| 0.9036389999999983 | 0.2633080000000021 | 0.0542870000000022 |
| 0.7366697341143201 | 0.4302555918879643 | 0.1529852000231760 |
| 0.5690551823127347 | 0.0992456234601797 | 0.2514942773437404 |
| 0.9036389999999983 | 0.0133080000000021 | 0.0542870000000022 |
| 0.7363778875639133 | 0.1802559369990043 | 0.1532521065874451 |
| 0.5699997360734743 | 0.3468406390682167 | 0.2516972114846153 |
| 0.6536389999999983 | 0.0133080000000021 | 0.0542870000000022 |
| 0.9856956265487672 | 0.1807775499519730 | 0.1530358328730852 |
| 0.8191903325051626 | 0.3479764639641307 | 0.2519160288320385 |
| 0.6536389999999983 | 0.2633080000000021 | 0.0542870000000022 |
| 0.9866224301554162 | 0.4305596351244452 | 0.1532778997419302 |
| 0.8184871070302189 | 0.0966316859094341 | 0.2520378564274332 |
| 0.4036389999999983 | 0.7633080000000021 | 0.0542870000000022 |
| 0.2359834222851713 | 0.9315621638556990 | 0.1518321069958184 |
| 0.0689051124714656 | 0.5992389858219456 | 0.2510107116637493 |
| 0.4036389999999983 | 0.5133080000000021 | 0.0542870000000022 |
| 0.2364788580010197 | 0.6788560409066058 | 0.1533227404424957 |
| 0.0686737380714944 | 0.8485195359741982 | 0.2509936004907937 |

|                    |                    |                    |
|--------------------|--------------------|--------------------|
| 0.153638999999983  | 0.5133080000000021 | 0.0542870000000022 |
| 0.4852781169125612 | 0.6809512616542602 | 0.1542678249525873 |
| 0.3146031583796102 | 0.8540509529787285 | 0.2466285441869978 |
| 0.153638999999983  | 0.7633080000000021 | 0.0542870000000022 |
| 0.4879098094955518 | 0.9302250272679033 | 0.1532058786697881 |
| 0.3283090809901512 | 0.6020929406709139 | 0.2665377258599637 |
| 0.903638999999983  | 0.7633080000000021 | 0.0542870000000022 |
| 0.7350156495403110 | 0.9298029281144806 | 0.1535372107635579 |
| 0.5716169371307425 | 0.5949673063070077 | 0.2513822516194704 |
| 0.903638999999983  | 0.5133080000000021 | 0.0542870000000022 |
| 0.7358377384233319 | 0.6797128700339039 | 0.1528659105626770 |
| 0.5664368260123770 | 0.8424027880966564 | 0.2579863520107669 |
| 0.653638999999983  | 0.5133080000000021 | 0.0542870000000022 |
| 0.9861999745078825 | 0.6804975677654738 | 0.1527788281605408 |
| 0.8259304614629467 | 0.8509026650430219 | 0.2495848425051969 |
| 0.653638999999983  | 0.7633080000000021 | 0.0542870000000022 |
| 0.9858868457952507 | 0.9311113388652807 | 0.1523507620179460 |
| 0.8200596047068187 | 0.5980488719202477 | 0.2517076806708891 |

TiH<sub>1.97</sub>-Hv-NH<sub>2</sub>O

|                    |                     |                     |
|--------------------|---------------------|---------------------|
| 10.193035999999993 | -5.9205420000000002 | 0.0221310000000000  |
| 0.0000000000000000 | 11.7965890000000009 | -0.0158720000000000 |

0.0000000000000000 0.0000000000000000 27.2903899999999986

H N O Ti

97 1 1 48

Selective dynamics

Direct

|                    |                    |                    |
|--------------------|--------------------|--------------------|
| 0.0705460000000002 | 0.3465610000000012 | 0.0195900000000009 |
| 0.4028869568671904 | 0.0131610271447039 | 0.1239277238721710 |
| 0.2346895125225205 | 0.1787206036332401 | 0.2245081597347114 |
| 0.4867330000000010 | 0.4300550000000030 | 0.0814719999999980 |
| 0.3189341163067544 | 0.0966597758111846 | 0.1820533381733064 |
| 0.1472510138850212 | 0.2615896383301595 | 0.2855198265035599 |
| 0.0705460000000002 | 0.0965599999999966 | 0.0195900000000009 |
| 0.4032842476942552 | 0.2640350990168195 | 0.1241030524377272 |
| 0.2345380864406423 | 0.4293771642306076 | 0.2249026070554786 |
| 0.4867330000000010 | 0.1800550000000030 | 0.0814719999999980 |
| 0.3187994326949022 | 0.3467067754265916 | 0.1823231361198976 |
| 0.1512811135437503 | 0.0127361325761490 | 0.2863001444100087 |
| 0.3205450000000027 | 0.0965599999999966 | 0.0195900000000009 |
| 0.1532435454368889 | 0.2634715935865984 | 0.1239557321848682 |
| 0.4863675658807017 | 0.4319096520552883 | 0.2258482004570435 |
| 0.2367330000000010 | 0.1800539999999984 | 0.0814719999999980 |
| 0.0682858721698189 | 0.3462705733536363 | 0.1813272712373690 |



|                    |                    |                    |
|--------------------|--------------------|--------------------|
| 0.4016949988606754 | 0.0133223113031501 | 0.2861462086918683 |
| 0.3205450000000027 | 0.346559999999966  | 0.0195900000000009 |
| 0.1532350066863560 | 0.0134320722455595 | 0.1239833785778067 |
| 0.4845541537234230 | 0.1784874586843808 | 0.2242441962267771 |
| 0.2367330000000010 | 0.4300550000000030 | 0.0814719999999980 |
| 0.0689993834573611 | 0.0965932490357681 | 0.1819092009815541 |
| 0.4036207575308065 | 0.2639943075260527 | 0.2868385662699550 |
| 0.5705460000000002 | 0.3465610000000012 | 0.0195900000000009 |
| 0.9030873793413076 | 0.0130036199610876 | 0.1238227375936036 |
| 0.7349184834919270 | 0.1796046338594300 | 0.2241908364373485 |
| 0.9867330000000010 | 0.4300550000000030 | 0.0814719999999980 |
| 0.8188027738032444 | 0.0965573619115198 | 0.1816640002507098 |
| 0.6512677952916639 | 0.2628105936290038 | 0.2860409464343007 |
| 0.5705460000000002 | 0.096559999999966  | 0.0195900000000009 |
| 0.9027540333320474 | 0.2630529375243136 | 0.1238085757411847 |
| 0.7362062264786811 | 0.4299596533464062 | 0.2239403945885597 |
| 0.9867330000000010 | 0.1800550000000030 | 0.0814719999999980 |
| 0.8186929451958321 | 0.3465329013007371 | 0.1816685850297661 |
| 0.6512505137345366 | 0.0133985548883042 | 0.2859702793484302 |
| 0.8205460000000002 | 0.096559999999966  | 0.0195900000000009 |
| 0.6527690985180872 | 0.2631497730828223 | 0.1238433220680818 |
| 0.9840082292125537 | 0.4305823595634645 | 0.2238178120577578 |

0.736733000000010 0.180053999999984 0.081471999999980  
0.5690244563893051 0.3468118852428469 0.1816388032628233  
0.9010227548671433 0.0128233665050696 0.2858187090657270  
0.820546000000002 0.346559999999966 0.019590000000009  
0.6527835267273325 0.0130199532802118 0.1238295351031028  
0.9841330389735155 0.1777613147759271 0.2238333396147965  
0.736733000000010 0.430055000000030 0.081471999999980  
0.5686103697000786 0.0965189088275570 0.1817238290224275  
0.9001356871992543 0.2625969332805307 0.2862040266655951  
0.070546000000002 0.846561000000012 0.019590000000009  
0.4029964953488707 0.5132058918701604 0.1240906851684132  
0.2343957121942117 0.6802950954548960 0.2244553029768796  
0.486733000000010 0.930055000000030 0.081471999999980  
0.3188742617603700 0.5965199801870297 0.1822346573424825  
0.1511725898560589 0.7632859773637630 0.2863659629296188  
0.070546000000002 0.596561000000012 0.019590000000009  
0.4032362295498337 0.7627533324573724 0.1240867273545279  
0.2358706550736263 0.9300533102073096 0.2245957115097126  
0.486733000000010 0.680053999999984 0.081471999999980  
0.3189283557834534 0.8465988662711779 0.1820647019946698  
0.1472313334295286 0.5107790626639696 0.2854813393581914  
0.320545000000027 0.596561000000012 0.019590000000009

0.1531482076551129 0.7631744870144926 0.1240011305653907  
0.4844348575973500 0.9305294209402605 0.2241960539024421  
0.2367330000000010 0.6800550000000030 0.0814719999999980  
0.0691817064610285 0.8466406269665498 0.1818679647125848  
0.3205450000000027 0.8465610000000012 0.0195900000000009  
0.1532188524293712 0.5131784827427623 0.1239640667662106  
0.4863046450808945 0.6787912919715059 0.2258350285747033  
0.2367330000000010 0.9300550000000030 0.0814719999999980  
0.0688560171715960 0.5966199095951893 0.1819149426932914  
0.4037094230200209 0.7644494155008781 0.2867848315887536  
0.5705460000000002 0.8465610000000012 0.0195900000000009  
0.9029641900120174 0.5132907371735679 0.1238352449592769  
0.7331026188202037 0.6786858106584411 0.2254336589933004  
0.9867330000000010 0.9300550000000030 0.0814719999999980  
0.8189128204174284 0.5966027636095403 0.1817447833500042  
0.6562229210914607 0.7725069309433135 0.2850155895112363  
0.5705460000000002 0.5965610000000012 0.0195900000000009  
0.9026972982345020 0.7630240594155353 0.1240362768319229  
0.7364135630076408 0.9306545517059805 0.2238976140300867  
0.9867330000000010 0.6800550000000030 0.0814719999999980  
0.8190102320997203 0.8466196489475892 0.1817188942604211  
0.6561340813937628 0.5089419179702523 0.2853220313891729

|                    |                    |                    |
|--------------------|--------------------|--------------------|
| 0.8205460000000002 | 0.5965610000000012 | 0.0195900000000009 |
| 0.6526222959405016 | 0.7629373553898620 | 0.1240537793817624 |
| 0.9863805249036558 | 0.9302861177957091 | 0.2242476925884091 |
| 0.7367330000000010 | 0.6800550000000030 | 0.0814719999999980 |
| 0.5691434670982699 | 0.8466298699960357 | 0.1815173523976414 |
| 0.9008463353920427 | 0.5130350569498170 | 0.2858748100857346 |
| 0.8205460000000002 | 0.8465610000000012 | 0.0195900000000009 |
| 0.6524858308597630 | 0.5130589386533231 | 0.1240699589657777 |
| 0.9861264139069355 | 0.6801808598998255 | 0.2242521233277179 |
| 0.7367330000000010 | 0.9300550000000030 | 0.0814719999999980 |
| 0.5698347904346882 | 0.5971152377391699 | 0.1826597177973200 |
| 0.9020379758877194 | 0.7635082014889325 | 0.2858726687027186 |
| 0.4864368844642198 | 0.4872530900798273 | 0.3528575919186631 |
| 0.4871953829491714 | 0.6306739511740215 | 0.3515441287358008 |
| 0.4934025857649471 | 0.5610819386769548 | 0.3309187024002972 |
| 0.3756311480614251 | 0.5009076352084215 | 0.2998321119620477 |
| 0.4036389999999983 | 0.2633080000000021 | 0.0542870000000022 |
| 0.2364265890401732 | 0.4301353001855485 | 0.1532957760524994 |
| 0.0682405014389730 | 0.0962390686002505 | 0.2517268371999152 |
| 0.4036389999999983 | 0.0133080000000021 | 0.0542870000000022 |
| 0.2362678079159272 | 0.1803167714494335 | 0.1530299097658153 |
| 0.0629763793334588 | 0.3438807022769366 | 0.2502860528764591 |

0.153638999999983 0.013308000000021 0.054287000000022  
0.4857945661542478 0.1799140113246954 0.1528286581528479  
0.3180140013113145 0.3438922899669245 0.2523468501970033  
0.153638999999983 0.263308000000021 0.054287000000022  
0.4857962866163720 0.4308912710722862 0.1536755129495064  
0.3182404241232244 0.0967767575435708 0.2518832126330688  
0.903638999999983 0.263308000000021 0.054287000000022  
0.7359788606453214 0.4299302844348655 0.1527586941899222  
0.5683635101404767 0.0965494150496082 0.2514497669570890  
0.903638999999983 0.013308000000021 0.054287000000022  
0.7356420473632207 0.1797578771097486 0.1527278970182385  
0.5691466632515778 0.3451088762916557 0.2508193473579515  
0.653638999999983 0.013308000000021 0.054287000000022  
0.9857599451762786 0.1796540542209632 0.1526753661793014  
0.8179690091231955 0.3460242260207725 0.2514656871808549  
0.653638999999983 0.263308000000021 0.054287000000022  
0.9856957316483644 0.4298446839281619 0.1527126633054350  
0.8180167556821222 0.0966198369213904 0.2514326222087772  
0.403638999999983 0.763308000000021 0.054287000000022  
0.2360750797946163 0.9299585989932980 0.1530076921025570  
0.0679577472331881 0.5965945587505144 0.2517347569794150  
0.403638999999983 0.513308000000021 0.054287000000022

|                    |                    |                    |
|--------------------|--------------------|--------------------|
| 0.2361586532486989 | 0.6798354541440990 | 0.1530508708123393 |
| 0.0685146461964170 | 0.8464410134967021 | 0.2514942140654599 |
| 0.1536389999999983 | 0.5133080000000021 | 0.0542870000000022 |
| 0.4858944766988272 | 0.6789313158333803 | 0.1535827867272778 |
| 0.3181401546067239 | 0.8460656761002703 | 0.2519375436878821 |
| 0.1536389999999983 | 0.7633080000000021 | 0.0542870000000022 |
| 0.4858144514159841 | 0.9298566704846281 | 0.1528549837974949 |
| 0.3175012010276623 | 0.5987200442359789 | 0.2521977479285480 |
| 0.9036389999999983 | 0.7633080000000021 | 0.0542870000000022 |
| 0.7362099175338322 | 0.9300744682753891 | 0.1527396199657593 |
| 0.5696254829876030 | 0.5970751477923634 | 0.2561373523043015 |
| 0.9036389999999983 | 0.5133080000000021 | 0.0542870000000022 |
| 0.7352639621895305 | 0.6795400456421786 | 0.1531368815507594 |
| 0.5692522767967398 | 0.8490760575125560 | 0.2506280239175809 |
| 0.6536389999999983 | 0.5133080000000021 | 0.0542870000000022 |
| 0.9861056999725777 | 0.6799175990279936 | 0.1528655075318691 |
| 0.8196239764177793 | 0.8470912006002489 | 0.2510718910467201 |
| 0.6536389999999983 | 0.7633080000000021 | 0.0542870000000022 |
| 0.9862360479612988 | 0.9299768363560670 | 0.1528860875335241 |
| 0.8194597991966993 | 0.5970924335809780 | 0.2511035071752575 |

TiH<sub>1.97</sub>-NH<sub>2</sub>O

|                    |                    |                    |
|--------------------|--------------------|--------------------|
| 10.193035999999993 | -5.920542000000002 | 0.022131000000000  |
| 0.000000000000000  | 11.796589000000009 | -0.015872000000000 |
| 0.000000000000000  | 0.000000000000000  | 27.290389999999986 |

|    |   |   |    |
|----|---|---|----|
| H  | N | O | Ti |
| 98 | 1 | 1 | 48 |

Selective dynamics

Direct

|                    |                    |                    |
|--------------------|--------------------|--------------------|
| 0.070546000000002  | 0.346561000000012  | 0.019590000000009  |
| 0.4037857497406115 | 0.0138163269243106 | 0.1237868480733695 |
| 0.2340669570934455 | 0.1773986981232172 | 0.2232305674558051 |
| 0.486733000000010  | 0.430055000000030  | 0.081471999999980  |
| 0.3194872049316328 | 0.0975652648236870 | 0.1812246958149482 |
| 0.1533963413974513 | 0.2640116041102603 | 0.2852579026254347 |
| 0.070546000000002  | 0.096559999999966  | 0.019590000000009  |
| 0.4038544697387543 | 0.2641194957180721 | 0.1238120583818011 |
| 0.2445796582277888 | 0.4444768011347531 | 0.2290904599463157 |
| 0.486733000000010  | 0.180055000000030  | 0.081471999999980  |
| 0.3199763372761061 | 0.3477409457099422 | 0.1811155179373969 |
| 0.1523828192361013 | 0.0146768619691624 | 0.2858698048195122 |
| 0.320545000000027  | 0.096559999999966  | 0.019590000000009  |
| 0.1539528564938060 | 0.2652789949442314 | 0.1241225332363228 |
| 0.4867844491187487 | 0.4288953949386055 | 0.2236259156016020 |

|                    |                    |                    |
|--------------------|--------------------|--------------------|
| 0.236733000000010  | 0.180053999999984  | 0.081471999999980  |
| 0.0710608755374098 | 0.3483645425159135 | 0.1820510386973055 |
| 0.4015462752750060 | 0.0151163333715013 | 0.2849749815677242 |
| 0.3205450000000027 | 0.346559999999966  | 0.0195900000000009 |
| 0.1530592150353019 | 0.0137887242407628 | 0.1238276998034554 |
| 0.4859981204929016 | 0.1809041266480295 | 0.2239373230695739 |
| 0.236733000000010  | 0.4300550000000030 | 0.081471999999980  |
| 0.0693668951231834 | 0.0971724516404921 | 0.1815359968328954 |
| 0.4019142656592675 | 0.2632124089614457 | 0.2851282175688003 |
| 0.5705460000000002 | 0.3465610000000012 | 0.0195900000000009 |
| 0.9032523139988234 | 0.0140765095144675 | 0.1239076358664563 |
| 0.7368494552765616 | 0.1813892761110201 | 0.2244509259031480 |
| 0.986733000000010  | 0.4300550000000030 | 0.081471999999980  |
| 0.8197418911755789 | 0.0975605323588341 | 0.1818234076325086 |
| 0.6534771414091843 | 0.2648578905593745 | 0.2867750652641238 |
| 0.5705460000000002 | 0.096559999999966  | 0.0195900000000009 |
| 0.9039124113039138 | 0.2643776531010512 | 0.1239236031570540 |
| 0.7369272331751472 | 0.4311899385199644 | 0.2243904742446208 |
| 0.986733000000010  | 0.1800550000000030 | 0.081471999999980  |
| 0.8202720714209684 | 0.3476923288195639 | 0.1819798500669604 |
| 0.6531562229217431 | 0.0159819754430564 | 0.2864422216071826 |
| 0.8205460000000002 | 0.096559999999966  | 0.0195900000000009 |



|                    |                    |                    |
|--------------------|--------------------|--------------------|
| 0.6537575832640424 | 0.2638975209901946 | 0.1237838576910324 |
| 0.9868518220495851 | 0.4313966526383842 | 0.2244050886482854 |
| 0.7367330000000010 | 0.1800539999999984 | 0.0814719999999980 |
| 0.5701815449852936 | 0.3472236399142185 | 0.1817596970065710 |
| 0.9028632240612690 | 0.0146398066210533 | 0.2860853707711685 |
| 0.8205460000000002 | 0.3465599999999966 | 0.0195900000000009 |
| 0.6540867912724913 | 0.0143140952750412 | 0.1238679155692162 |
| 0.9859151460872490 | 0.1804242824502079 | 0.2242533663610359 |
| 0.7367330000000010 | 0.4300550000000030 | 0.0814719999999980 |
| 0.5701558805069441 | 0.0980987901481349 | 0.1817514126969352 |
| 0.9034463540058889 | 0.2645577596699750 | 0.2854551896452546 |
| 0.0705460000000002 | 0.8465610000000012 | 0.0195900000000009 |
| 0.4040533093292626 | 0.5141338281592751 | 0.1240992818234396 |
| 0.2442090021567218 | 0.6763100746630538 | 0.2288332308539306 |
| 0.4867330000000010 | 0.9300550000000030 | 0.0814719999999980 |
| 0.3212455298817627 | 0.5983364258452278 | 0.1819463210980289 |
| 0.1536206156014166 | 0.7663643556953373 | 0.2851048139189792 |
| 0.0705460000000002 | 0.5965610000000012 | 0.0195900000000009 |
| 0.4041049721920025 | 0.7641535663286667 | 0.1240485647922976 |
| 0.2336803554726477 | 0.9330644987764081 | 0.2229819034612018 |
| 0.4867330000000010 | 0.6800539999999984 | 0.0814719999999980 |
| 0.3198675306173915 | 0.8477020650949689 | 0.1807938642037616 |

0.1384216556459477 0.5079920843925776 0.2854312838300271  
0.3205450000000027 0.5965610000000012 0.0195900000000009  
0.1540599593976755 0.7629636317373771 0.1241166648120831  
0.4868561009277872 0.9334745435078937 0.2235581727099124  
0.2367330000000010 0.6800550000000030 0.0814719999999980  
0.0693173047805931 0.8477264279575506 0.1815259892026467  
0.4098730314703548 0.4940719011518541 0.2855001267001323  
0.3205450000000027 0.8465610000000012 0.0195900000000009  
0.1538752662210343 0.5139555130607075 0.1241773659731121  
0.4773566878561474 0.6764626018515829 0.2291289618311831  
0.2367330000000010 0.9300550000000030 0.0814719999999980  
0.0709885889174460 0.5979994293224645 0.1819042419067852  
0.4083462316913957 0.7930509683693249 0.2847984038283984  
0.5705460000000002 0.8465610000000012 0.0195900000000009  
0.9039771596223736 0.5136572554689982 0.1239379493361221  
0.7382004852649996 0.6818796457811834 0.2240449616567665  
0.9867330000000010 0.9300550000000030 0.0814719999999980  
0.8199293437817147 0.5974380592254536 0.1817741858805887  
0.6577708151874847 0.7667288363772301 0.2840645941299074  
0.5705460000000002 0.5965610000000012 0.0195900000000009  
0.9033022150006759 0.7634363200659733 0.1239389461808683  
0.7376088684794948 0.9314584263909863 0.2241383327184485

0.986733000000010 0.680055000000030 0.081471999999980  
0.8196774199362868 0.8474307735251123 0.1817279831380027  
0.6536375249908338 0.5138906916741613 0.2862936884476808  
0.820546000000002 0.596561000000012 0.019590000000009  
0.6531609268904464 0.7635816858276080 0.1241276170519589  
0.9869802062073962 0.9314219446037643 0.2237788349743402  
0.736733000000010 0.680055000000030 0.081471999999980  
0.5691538374240713 0.8470749130635278 0.1821556852094628  
0.9036186072576853 0.5154332305110304 0.2854718290341510  
0.820546000000002 0.846561000000012 0.019590000000009  
0.6539977935675287 0.5137534385542195 0.1238811004973830  
0.9860611688296289 0.6817543917410823 0.2240541462057026  
0.736733000000010 0.930055000000030 0.081471999999980  
0.5692450033201147 0.5973781898494589 0.1819690050852790  
0.9029661181089570 0.7647543260489950 0.2861578649418982  
0.4882569490911449 0.6152422126518003 0.3539182096558522  
0.4850032843251276 0.7575926344369631 0.3536197945422269  
0.4484199217383620 0.6662947653027799 0.3379581499183151  
0.3108218628862570 0.5951098992999627 0.3418485986868721  
0.403638999999983 0.263308000000021 0.054287000000022  
0.2381529092171540 0.4330357918689240 0.1539034948388303  
0.0687407723878243 0.0969537902123291 0.2512394178160530

|                    |                    |                    |
|--------------------|--------------------|--------------------|
| 0.403638999999983  | 0.013308000000021  | 0.054287000000022  |
| 0.2365138378818036 | 0.1808118258902323 | 0.1524509619903737 |
| 0.0703983819775305 | 0.3471422381839214 | 0.2510501767733608 |
| 0.153638999999983  | 0.013308000000021  | 0.054287000000022  |
| 0.4869780639767100 | 0.1807917028006952 | 0.1526933270738381 |
| 0.3176853901178357 | 0.3430252076747904 | 0.2495740505094715 |
| 0.153638999999983  | 0.263308000000021  | 0.054287000000022  |
| 0.4874001324275045 | 0.4311354423977208 | 0.1528864960145115 |
| 0.3190835305458181 | 0.0977391411755702 | 0.2509674587148484 |
| 0.903638999999983  | 0.263308000000021  | 0.054287000000022  |
| 0.7369285684646615 | 0.4302555395308485 | 0.1528786921187360 |
| 0.5700007792321986 | 0.0998435074489381 | 0.2515576108585574 |
| 0.903638999999983  | 0.013308000000021  | 0.054287000000022  |
| 0.7368842680487654 | 0.1812236124383236 | 0.1528759094824860 |
| 0.5702324524389368 | 0.3463204475651419 | 0.2516264444365361 |
| 0.653638999999983  | 0.013308000000021  | 0.054287000000022  |
| 0.9866013141039540 | 0.1808840623094770 | 0.1528634083658866 |
| 0.8192361526299827 | 0.3476870221614103 | 0.2515857649283350 |
| 0.653638999999983  | 0.263308000000021  | 0.054287000000022  |
| 0.9876257809018896 | 0.4310685057534694 | 0.1531824078719108 |
| 0.8194139413855498 | 0.0974507394969142 | 0.2515950116686440 |
| 0.403638999999983  | 0.763308000000021  | 0.054287000000022  |

0.2363324139763085 0.9307094012667163 0.1523760253034171  
0.0699827984660852 0.5998222570482458 0.2508217288206648  
0.4036389999999983 0.5133080000000021 0.0542870000000022  
0.2382616867410899 0.6798663735778330 0.1538199658611664  
0.0688600551920115 0.8482727015292619 0.2513008486164396  
0.1536389999999983 0.5133080000000021 0.0542870000000022  
0.4856220283635751 0.6803369971768177 0.1536171781850644  
0.3172204681147704 0.8514822987677966 0.2491279545912015  
0.1536389999999983 0.7633080000000021 0.0542870000000022  
0.4875713916420264 0.9309693866882925 0.1528213483659240  
0.3249454931358916 0.6010617669832177 0.2715156482304805  
0.9036389999999983 0.7633080000000021 0.0542870000000022  
0.7363065284479302 0.9305530328162508 0.1529696308864495  
0.5724558267371834 0.5951306324150865 0.2509890993194828  
0.9036389999999983 0.5133080000000021 0.0542870000000022  
0.7364290021228235 0.6803705891994467 0.1529603149423953  
0.5717293427885952 0.8527033400115945 0.2513456932448180  
0.6536389999999983 0.5133080000000021 0.0542870000000022  
0.9866841002740800 0.6805607447922908 0.1528469757716817  
0.8210688791841809 0.8484965701640215 0.2513428280246811  
0.6536389999999983 0.7633080000000021 0.0542870000000022  
0.9859607987145043 0.9304581219921102 0.1527403175449379

0.8199450349708958 0.5981377661155022 0.2515461692616158

TiH<sub>1.97</sub>-Hv-O

|                    |                    |                    |
|--------------------|--------------------|--------------------|
| 10.193035999999993 | -5.920542000000002 | 0.022131000000000  |
| 0.000000000000000  | 11.796589000000009 | -0.015872000000000 |
| 0.000000000000000  | 0.000000000000000  | 27.290389999999986 |

| H  | O | Ti |
|----|---|----|
| 95 | 1 | 48 |

Selective dynamics

Direct

|                    |                    |                    |
|--------------------|--------------------|--------------------|
| 0.070546000000002  | 0.346561000000012  | 0.019590000000009  |
| 0.4037302553397504 | 0.0134585939459664 | 0.1239263242275081 |
| 0.2366078612425869 | 0.1791591944395959 | 0.2251415050202408 |
| 0.486733000000010  | 0.430055000000030  | 0.081471999999980  |
| 0.3201980126393187 | 0.0970237697210753 | 0.1821998387878044 |
| 0.1506317981426998 | 0.2630790235704218 | 0.2854222467001886 |
| 0.070546000000002  | 0.096559999999966  | 0.019590000000009  |
| 0.4037941704845837 | 0.2636522368038990 | 0.1240197341740991 |
| 0.2345260292634816 | 0.4292341213535067 | 0.2239129082436122 |
| 0.486733000000010  | 0.180055000000030  | 0.081471999999980  |
| 0.3199293046177997 | 0.3468714020590125 | 0.1818573709743308 |
| 0.1532620751752521 | 0.0134833518514661 | 0.2865561452894522 |

0.3205450000000027 0.0965599999999966 0.0195900000000009  
0.1540408901938768 0.2635015157517918 0.1239978187984677  
0.4885010155454968 0.4293089152301630 0.2239565917236948  
0.2367330000000010 0.1800539999999984 0.0814719999999980  
0.0697753610369014 0.3469285837143614 0.1814089353221478  
0.4041400981629806 0.0143381019713890 0.2861983090892480  
0.3205450000000027 0.3465599999999966 0.0195900000000009  
0.1539838123597561 0.0135976035479370 0.1240464809751098  
0.4863543370584887 0.1790304110771390 0.2242491475382992  
0.2367330000000010 0.4300550000000030 0.0814719999999980  
0.0702091374882275 0.0969997856736544 0.1821306350371380  
0.4051916163370379 0.2632192994471978 0.2855355088465215  
0.5705460000000002 0.3465610000000012 0.0195900000000009  
0.9040897628570400 0.0134401807646792 0.1239041493510039  
0.7372412107819110 0.1806780257956357 0.2241682718415945  
0.9867330000000010 0.4300550000000030 0.0814719999999980  
0.8202676197857990 0.0971303798652829 0.1817687875746148  
0.6541135721084568 0.2636993753952581 0.2861123062103495  
0.5705460000000002 0.0965599999999966 0.0195900000000009  
0.9040127179528286 0.2636123545494897 0.1238666231253981  
0.7389500457362426 0.4316114597290741 0.2242130722575165  
0.9867330000000010 0.1800550000000030 0.0814719999999980

0.8201800000418050 0.3471793928672822 0.1817059435447619  
0.6538398674650422 0.0149048045769433 0.2861720872630610  
0.8205460000000002 0.0965599999999966 0.0195900000000009  
0.6538551140895180 0.2636932121083205 0.1238990844526331  
0.9865766791541699 0.4317777523435701 0.2241928268350931  
0.7367330000000010 0.1800539999999984 0.0814719999999980  
0.5704283261237798 0.3470216372446377 0.1814588039539057  
0.9033288163330306 0.0144657351334003 0.2860817167682468  
0.8205460000000002 0.3465599999999966 0.0195900000000009  
0.6538912170400640 0.0134427987993515 0.1238736971807617  
0.9865092121570794 0.1788708074510062 0.2242671259492265  
0.7367330000000010 0.4300550000000030 0.0814719999999980  
0.5702181642850482 0.0972104355103373 0.1817328677196695  
0.9026876667701743 0.2638310025830260 0.2861549894532919  
0.0705460000000002 0.8465610000000012 0.0195900000000009  
0.4038537901991403 0.5135711471075609 0.1239619915694157  
0.2364907520101402 0.6813350326995886 0.2250832759938596  
0.4867330000000010 0.9300550000000030 0.0814719999999980  
0.3200802527047459 0.5972230529391627 0.1818542788382987  
0.1532142458764887 0.7645436292796646 0.2866139489043591  
0.0705460000000002 0.5965610000000012 0.0195900000000009  
0.4037341101303922 0.7634416097042722 0.1240008827720143



0.2374647178740343 0.9307181763232769 0.2246271736103824  
0.4867330000000010 0.6800539999999984 0.0814719999999980  
0.3202249416146800 0.8472963403867734 0.1822101300633701  
0.1506233021644570 0.5124741819901067 0.2854325473548214  
0.3205450000000027 0.5965610000000012 0.0195900000000009  
0.1540011635548857 0.7635713007146478 0.1240621467323737  
0.4862232729155858 0.9313850789029021 0.2241922698148285  
0.2367330000000010 0.6800550000000030 0.0814719999999980  
0.0703401838333681 0.8471801561201604 0.1821250704120888  
0.3205450000000027 0.8465610000000012 0.0195900000000009  
0.1540687603176936 0.5137945375183014 0.1239994661588368  
0.4885373478114635 0.6832049796945976 0.2239044420615972  
0.2367330000000010 0.9300550000000030 0.0814719999999980  
0.0701309787557364 0.5972579201796949 0.1821364432047748  
0.4052296685206641 0.7666497059665370 0.2854827617243223  
0.5705460000000002 0.8465610000000012 0.0195900000000009  
0.9040693653626624 0.5138107779935537 0.1239122009692282  
0.7392170334634576 0.6815242141563597 0.2249881646976969  
0.9867330000000010 0.9300550000000030 0.0814719999999980  
0.8205176050961170 0.5972962824686814 0.1821685793654557  
0.6545125608854366 0.7668517889230464 0.2854036314868995  
0.5705460000000002 0.5965610000000012 0.0195900000000009

|                    |                    |                    |
|--------------------|--------------------|--------------------|
| 0.9040526802776332 | 0.7636289322407673 | 0.1240455334562508 |
| 0.7390480316579299 | 0.9314454680688651 | 0.2242201920953813 |
| 0.986733000000010  | 0.680055000000030  | 0.081471999999980  |
| 0.8204878440957992 | 0.8472652339926561 | 0.1821735446283174 |
| 0.6547967649470032 | 0.5126260303885727 | 0.2854587232365911 |
| 0.820546000000002  | 0.596561000000012  | 0.019590000000009  |
| 0.6539645781396639 | 0.7634237773869808 | 0.1240049990739965 |
| 0.9872640001425917 | 0.9303722803222120 | 0.2246139823032585 |
| 0.736733000000010  | 0.680055000000030  | 0.081471999999980  |
| 0.5704935495059428 | 0.8476019252058081 | 0.1813919337539354 |
| 0.9033999872685368 | 0.5135974518716542 | 0.2861016960259652 |
| 0.820546000000002  | 0.846561000000012  | 0.019590000000009  |
| 0.6537995291649095 | 0.5137064776388368 | 0.1240239435771104 |
| 0.9872941795881288 | 0.6809366037411431 | 0.2245359109162367 |
| 0.736733000000010  | 0.930055000000030  | 0.081471999999980  |
| 0.5706607331507951 | 0.5974772016571053 | 0.1817228100339952 |
| 0.9043097663557447 | 0.7645304044622628 | 0.2864939733460000 |
| 0.4038180545991557 | 0.5145545258613813 | 0.2890003515466973 |
| 0.403638999999983  | 0.263308000000021  | 0.054287000000022  |
| 0.2374985396841431 | 0.4305767113224549 | 0.1531141676025178 |
| 0.0706747731239405 | 0.0969102094087454 | 0.2518841138899865 |
| 0.403638999999983  | 0.013308000000021  | 0.054287000000022  |

|                    |                    |                    |
|--------------------|--------------------|--------------------|
| 0.2371542178288828 | 0.1803889438348775 | 0.1532612446641103 |
| 0.0664054230682377 | 0.3455180077990055 | 0.2505655003578076 |
| 0.1536389999999983 | 0.0133080000000021 | 0.0542870000000022 |
| 0.4869003880042755 | 0.1801642643620991 | 0.1528750065614154 |
| 0.3212748623881070 | 0.3489121958536804 | 0.2523123654818380 |
| 0.1536389999999983 | 0.2633080000000021 | 0.0542870000000022 |
| 0.4866452995061128 | 0.4306995485486427 | 0.1531996601136517 |
| 0.3197944212825042 | 0.0969380142857552 | 0.2519079250900826 |
| 0.9036389999999983 | 0.2633080000000021 | 0.0542870000000022 |
| 0.7372750136647215 | 0.4305929992283953 | 0.1528660000441083 |
| 0.5705156258840998 | 0.0973913385247497 | 0.2514627071614414 |
| 0.9036389999999983 | 0.0133080000000021 | 0.0542870000000022 |
| 0.7371012566340186 | 0.1803598110656451 | 0.1526897398536012 |
| 0.5723312402865265 | 0.3456050897349813 | 0.2507112899882896 |
| 0.6536389999999983 | 0.0133080000000021 | 0.0542870000000022 |
| 0.9870195629310812 | 0.1800980458000132 | 0.1528637790505125 |
| 0.8204169415650935 | 0.3472555201938490 | 0.2514147778441012 |
| 0.6536389999999983 | 0.2633080000000021 | 0.0542870000000022 |
| 0.9869662184286757 | 0.4304692939164971 | 0.1528699493700232 |
| 0.8202951821699902 | 0.0975726435255437 | 0.2515288151297638 |
| 0.4036389999999983 | 0.7633080000000021 | 0.0542870000000022 |
| 0.2371875267333171 | 0.9304333893199829 | 0.1531259999959130 |

|                    |                    |                    |
|--------------------|--------------------|--------------------|
| 0.0706624913754960 | 0.5983448090351734 | 0.2518797069799297 |
| 0.4036389999999983 | 0.5133080000000021 | 0.0542870000000022 |
| 0.2371209131051613 | 0.6803657792853975 | 0.1533530102847791 |
| 0.0705575087222580 | 0.8474209811577676 | 0.2517942492841105 |
| 0.1536389999999983 | 0.5133080000000021 | 0.0542870000000022 |
| 0.4867755029673987 | 0.6798430352506719 | 0.1530978423552113 |
| 0.3196679016262100 | 0.8470680745541769 | 0.2519413497515064 |
| 0.1536389999999983 | 0.7633080000000021 | 0.0542870000000022 |
| 0.4869972957848602 | 0.9305089917758586 | 0.1528921096011800 |
| 0.3211404520624276 | 0.5966365317734448 | 0.2523278610164055 |
| 0.9036389999999983 | 0.7633080000000021 | 0.0542870000000022 |
| 0.7373584928712205 | 0.9303992547509606 | 0.1528763181628639 |
| 0.5692511100648719 | 0.5966721503928014 | 0.2521025454695187 |
| 0.9036389999999983 | 0.5133080000000021 | 0.0542870000000022 |
| 0.7372155572409341 | 0.6804155728678422 | 0.1532156692041273 |
| 0.5723061128836855 | 0.8513327578009694 | 0.2505659142892185 |
| 0.6536389999999983 | 0.5133080000000021 | 0.0542870000000022 |
| 0.9871073558302867 | 0.6803805896277025 | 0.1530945377691691 |
| 0.8208852509828048 | 0.8471780272219982 | 0.2518906749090953 |
| 0.6536389999999983 | 0.7633080000000021 | 0.0542870000000022 |
| 0.9871298444616269 | 0.9303542521771784 | 0.1531282222972594 |
| 0.8211400404088105 | 0.5981617138845264 | 0.2518659522293635 |

TiH<sub>1.97</sub>-O

|                    |                    |                    |
|--------------------|--------------------|--------------------|
| 10.193035999999993 | -5.920542000000002 | 0.022131000000000  |
| 0.000000000000000  | 11.796589000000009 | -0.015872000000000 |
| 0.000000000000000  | 0.000000000000000  | 27.290389999999986 |

|    |   |    |
|----|---|----|
| H  | O | Ti |
| 96 | 1 | 48 |

Selective dynamics

Direct

|                    |                    |                    |
|--------------------|--------------------|--------------------|
| 0.070546000000002  | 0.346561000000012  | 0.019590000000009  |
| 0.4048046723839692 | 0.0141218252806962 | 0.1238548478822203 |
| 0.2333896254451660 | 0.1743145349666602 | 0.2222877145569577 |
| 0.486733000000010  | 0.430055000000030  | 0.081471999999980  |
| 0.3198813362689878 | 0.0976958741508702 | 0.1810571531968795 |
| 0.1535489975776624 | 0.2634193402073619 | 0.2852057886387446 |
| 0.070546000000002  | 0.096559999999966  | 0.019590000000009  |
| 0.4048311640608910 | 0.2649992334351564 | 0.1238768758816523 |
| 0.2393406901237995 | 0.4354778662591817 | 0.2255500171016991 |
| 0.486733000000010  | 0.180055000000030  | 0.081471999999980  |
| 0.3197002021973332 | 0.3476186729972937 | 0.1802433596496302 |
| 0.1528745513443850 | 0.0150523687120028 | 0.2854193097353241 |
| 0.320545000000027  | 0.096559999999966  | 0.019590000000009  |

0.1535130998026745 0.2649705241979847 0.1238631315374773  
0.4883369589464458 0.4354973196502051 0.2253927416472435  
0.2367330000000010 0.1800539999999984 0.0814719999999980  
0.0701673987434007 0.3482321597638379 0.1823350480918853  
0.4012476267929058 0.0142146839639674 0.2852356630394860  
0.3205450000000027 0.3465599999999966 0.0195900000000009  
0.1536359461079934 0.0140025306965502 0.1236777378924684  
0.4873132785099031 0.1819401056942583 0.2242642465179633  
0.2367330000000010 0.4300550000000030 0.0814719999999980  
0.0698822519185823 0.0977165714343168 0.1809271319318323  
0.4011359484948823 0.2637763364207720 0.2853174583216757  
0.5705460000000002 0.3465610000000012 0.0195900000000009  
0.9027253902837319 0.0141906943530183 0.1238624760104867  
0.7365735069896671 0.1810924579796028 0.2248996327270567  
0.9867330000000010 0.4300550000000030 0.0814719999999980  
0.8194041702207976 0.0974829522752651 0.1822584993913822  
0.6521071764127552 0.2643723889474314 0.2860938337394209  
0.5705460000000002 0.0965599999999966 0.0195900000000009  
0.9032930455722007 0.2644037447508291 0.1239418637356330  
0.7365182791878297 0.4316795489873541 0.2249681479361150  
0.9867330000000010 0.1800550000000030 0.0814719999999980  
0.8198147708217248 0.3477906197082878 0.1824352874442134

|                    |                    |                    |
|--------------------|--------------------|--------------------|
| 0.6532272724447643 | 0.0161091761510464 | 0.2863041918586727 |
| 0.8205460000000002 | 0.0965599999999966 | 0.0195900000000009 |
| 0.6543973923864960 | 0.2644566892797812 | 0.1239651803543587 |
| 0.9871948894026883 | 0.4316473073404075 | 0.2249878774811571 |
| 0.7367330000000010 | 0.1800539999999984 | 0.0814719999999980 |
| 0.5698634144125706 | 0.3482167141151197 | 0.1822638623154493 |
| 0.9042357696456925 | 0.0142980859029734 | 0.2851244660824133 |
| 0.8205460000000002 | 0.3465599999999966 | 0.0195900000000009 |
| 0.6539400733770355 | 0.0144873718763727 | 0.1239357869718117 |
| 0.9863354740594752 | 0.1818431756119801 | 0.2243541732123321 |
| 0.7367330000000010 | 0.4300550000000030 | 0.0814719999999980 |
| 0.5700347046914093 | 0.0974019345568102 | 0.1821057733436470 |
| 0.9033699822336161 | 0.2644661234344420 | 0.2861483887693031 |
| 0.0705460000000002 | 0.8465610000000012 | 0.0195900000000009 |
| 0.4038008775880880 | 0.5146076427076748 | 0.1241470648601676 |
| 0.239278880919610  | 0.6799119820990943 | 0.2254076419393412 |
| 0.4867330000000010 | 0.9300550000000030 | 0.0814719999999980 |
| 0.3199266988469583 | 0.5977376108018977 | 0.1837912117784829 |
| 0.1537998226937699 | 0.7669207866469254 | 0.2852535997625840 |
| 0.0705460000000002 | 0.5965610000000012 | 0.0195900000000009 |
| 0.4039247967340894 | 0.7636608464629344 | 0.1240789396896054 |
| 0.2330965445073440 | 0.9350170351842380 | 0.2221884807392193 |

0.486733000000010 0.680053999999984 0.081471999999980  
0.3198754105434549 0.8476856519068448 0.1801060677318031  
0.1518758841963173 0.5146949042283169 0.2863766904784816  
0.320545000000027 0.596561000000012 0.019590000000009  
0.1535208956020177 0.7627989425406877 0.1238651081408578  
0.4882847977783940 0.9289209848217970 0.2253259667979479  
0.236733000000010 0.680055000000030 0.081471999999980  
0.0698891503226358 0.8477093701180550 0.1810654124822295  
0.3879892801641755 0.4828535493841900 0.2850454964733516  
0.320545000000027 0.846561000000012 0.019590000000009  
0.1531420573876582 0.5136817091040826 0.1239551840735519  
0.4864933743733905 0.6815924421555069 0.2203416709608689  
0.236733000000010 0.930055000000030 0.081471999999980  
0.0702248764433580 0.5975812344938540 0.1821832554271608  
0.3869776689118238 0.7812917497891760 0.2849537744148626  
0.570546000000002 0.846561000000012 0.019590000000009  
0.9031900620327385 0.5132174151186608 0.1239774612987818  
0.7325067950037559 0.6797745725276230 0.2253861052650498  
0.986733000000010 0.930055000000030 0.081471999999980  
0.8193820620997490 0.5977227584113212 0.1822680012429493  
0.6849587008452669 0.7805338131794112 0.2850027835379088  
0.570546000000002 0.596561000000012 0.019590000000009



0.9026355854025723 0.7627643477512367 0.1238887834861547  
0.7324414204505307 0.9288413078842980 0.2254323908755410  
0.9867330000000010 0.6800550000000030 0.0814719999999980  
0.8198983901139928 0.8478349804127804 0.1801965433617051  
0.6532300596866495 0.5146718392277492 0.2864093415002483  
0.8205460000000002 0.5965610000000012 0.0195900000000009  
0.6530108794156444 0.7637934094204503 0.1241467651790050  
0.9936730974927833 0.9346885838721163 0.2222722365375069  
0.7367330000000010 0.6800550000000030 0.0814719999999980  
0.5698352479373034 0.8476875331085942 0.1837621724066289  
0.9035355792662412 0.5159273332401404 0.2861043321879456  
0.8205460000000002 0.8465610000000012 0.0195900000000009  
0.6536901853861478 0.5138892711485270 0.1240008150229589  
0.9862284014493975 0.6808585711060644 0.2242970714579594  
0.7367330000000010 0.9300550000000030 0.0814719999999980  
0.5696650828446523 0.5978738859690027 0.1837227690952988  
0.9039681856666062 0.7669125490240376 0.2852509576822334  
0.4860511256723462 0.6816621384063278 0.2992766502904310  
0.4036389999999983 0.2633080000000021 0.0542870000000022  
0.2367803482684234 0.4322371005266094 0.1533116120091052  
0.0699434896782264 0.0979840756419674 0.2507215101490824  
0.4036389999999983 0.0133080000000021 0.0542870000000022

|                    |                    |                    |
|--------------------|--------------------|--------------------|
| 0.2368815054872336 | 0.1809609070914119 | 0.1520607435179784 |
| 0.0702046758799695 | 0.3477467896317019 | 0.2518562106650685 |
| 0.1536389999999983 | 0.0133080000000021 | 0.0542870000000022 |
| 0.4876641165703722 | 0.1812916997452050 | 0.1528551544835492 |
| 0.3158425421545069 | 0.3400675176185865 | 0.2483359010452819 |
| 0.1536389999999983 | 0.2633080000000021 | 0.0542870000000022 |
| 0.4876902118825124 | 0.4322559303884258 | 0.1533221567778697 |
| 0.3197437238310816 | 0.0979928050998889 | 0.2509969602468362 |
| 0.9036389999999983 | 0.2633080000000021 | 0.0542870000000022 |
| 0.7365375606457388 | 0.4310837998918154 | 0.1533858066437302 |
| 0.5689686489357070 | 0.0981971472060521 | 0.2515509980666978 |
| 0.9036389999999983 | 0.0133080000000021 | 0.0542870000000022 |
| 0.7367571202366431 | 0.1807650861769425 | 0.1532995816745656 |
| 0.5690613980090993 | 0.3476399044938097 | 0.2518276641575937 |
| 0.6536389999999983 | 0.0133080000000021 | 0.0542870000000022 |
| 0.9863083560057772 | 0.1814177918938584 | 0.1528196850725117 |
| 0.8198428392370062 | 0.3482699425514773 | 0.2520113342605825 |
| 0.6536389999999983 | 0.2633080000000021 | 0.0542870000000022 |
| 0.9868758546322141 | 0.4308859661145665 | 0.1533329357679327 |
| 0.8201875405440316 | 0.0978621279416844 | 0.2517752337510984 |
| 0.4036389999999983 | 0.7633080000000021 | 0.0542870000000022 |
| 0.2367830337536410 | 0.9308136603333416 | 0.1520549591912230 |

|                    |                    |                    |
|--------------------|--------------------|--------------------|
| 0.0699252061271550 | 0.5992181903716032 | 0.2516191660681639 |
| 0.403638999999983  | 0.513308000000021  | 0.054287000000022  |
| 0.2369961835001954 | 0.6794873577308866 | 0.1532332407304005 |
| 0.0700070814835726 | 0.848373651789967  | 0.2509904703344623 |
| 0.153638999999983  | 0.513308000000021  | 0.054287000000022  |
| 0.4867228961019823 | 0.6809437055443746 | 0.1540285902086641 |
| 0.3157344667222319 | 0.8524044092342834 | 0.2481909574410935 |
| 0.153638999999983  | 0.763308000000021  | 0.054287000000022  |
| 0.4880790186546419 | 0.9305949279364759 | 0.1532056126325473 |
| 0.3282787866583544 | 0.6024544006006384 | 0.2576053453357935 |
| 0.903638999999983  | 0.763308000000021  | 0.054287000000022  |
| 0.7354025263935628 | 0.9308433153270995 | 0.1532770546635272 |
| 0.5652026789322652 | 0.6026844972043025 | 0.2573810601005491 |
| 0.903638999999983  | 0.513308000000021  | 0.054287000000022  |
| 0.7353304600930111 | 0.6798537130571456 | 0.1533154485629832 |
| 0.5654343661791904 | 0.8397189123422114 | 0.2575410578068817 |
| 0.653638999999983  | 0.513308000000021  | 0.054287000000022  |
| 0.9863477091667757 | 0.6799226990637027 | 0.1528762000189719 |
| 0.8277999273896923 | 0.8522476896534501 | 0.2482286545712685 |
| 0.653638999999983  | 0.763308000000021  | 0.054287000000022  |
| 0.9866783396704600 | 0.9307370816873097 | 0.1520591306491577 |
| 0.8203688206974453 | 0.5990556138172524 | 0.2518266098439289 |

TiH<sub>1.97</sub>-Hv-OH

|                    |                    |                    |
|--------------------|--------------------|--------------------|
| 10.193035999999993 | -5.920542000000002 | 0.022131000000000  |
| 0.000000000000000  | 11.796589000000009 | -0.015872000000000 |
| 0.000000000000000  | 0.000000000000000  | 27.290389999999986 |

|    |   |    |
|----|---|----|
| H  | O | Ti |
| 96 | 1 | 48 |

Selective dynamics

Direct

|                    |                    |                    |
|--------------------|--------------------|--------------------|
| 0.070546000000002  | 0.346561000000012  | 0.019590000000009  |
| 0.4036842359938647 | 0.0135139807080544 | 0.1239132137484811 |
| 0.2372091969480619 | 0.1804137999416050 | 0.2246466088690448 |
| 0.486733000000010  | 0.430055000000030  | 0.081471999999980  |
| 0.3202329758239590 | 0.0972367049110316 | 0.1821868501160681 |
| 0.1520329911996298 | 0.2647227974539496 | 0.2863383269376881 |
| 0.070546000000002  | 0.096559999999966  | 0.019590000000009  |
| 0.4040319210828985 | 0.2640710634439066 | 0.1239492349613837 |
| 0.2367548938009637 | 0.4305052405410452 | 0.2247862264663757 |
| 0.486733000000010  | 0.180055000000030  | 0.081471999999980  |
| 0.3204761642204682 | 0.3476129640387655 | 0.1823702561846521 |
| 0.1535182079646808 | 0.0139977327676079 | 0.2866214821111965 |
| 0.320545000000027  | 0.096559999999966  | 0.019590000000009  |

0.1542610490770645 0.2639507009834872 0.1239412002215308  
0.4875511243215874 0.4304140837747400 0.2248273727196848  
0.2367330000000010 0.1800539999999984 0.0814719999999980  
0.0700805875029838 0.3471677987214514 0.1815039533193286  
0.4042978456405955 0.0146731627829320 0.2861415058464953  
0.3205450000000027 0.3465599999999966 0.0195900000000009  
0.1541178096277359 0.0139606884793279 0.1240418978228749  
0.4865328491529735 0.1794955888499371 0.2242010562875232  
0.2367330000000010 0.4300550000000030 0.0814719999999980  
0.0703743253116762 0.0972496425818189 0.1821848259566229  
0.4055105550870017 0.2645763779817811 0.2863758997251439  
0.5705460000000002 0.3465610000000012 0.0195900000000009  
0.9040990618256416 0.0135522322066789 0.1238968171190542  
0.7375297723686974 0.1809389116618868 0.2241298494262737  
0.9867330000000010 0.4300550000000030 0.0814719999999980  
0.8204171124372153 0.0973079382969460 0.1818007182209306  
0.6540719348109472 0.2639118857087752 0.2861937068510804  
0.5705460000000002 0.0965599999999966 0.0195900000000009  
0.9041339882043495 0.2637881369386140 0.1238506622014286  
0.7387609241238913 0.4316956685916878 0.2242342736639265  
0.9867330000000010 0.1800550000000030 0.0814719999999980  
0.8203723951861936 0.3473678705560048 0.1817948225576501

|                    |                    |                    |
|--------------------|--------------------|--------------------|
| 0.6540074105215260 | 0.0150696944744799 | 0.2862243659531501 |
| 0.8205460000000002 | 0.0965599999999966 | 0.0195900000000009 |
| 0.6538467491817191 | 0.2637243406195049 | 0.1238572043962069 |
| 0.9869005744665970 | 0.4317466179973479 | 0.2241481676403745 |
| 0.7367330000000010 | 0.1800539999999984 | 0.0814719999999980 |
| 0.5705082998343788 | 0.3471371459254025 | 0.1815779488758127 |
| 0.9034421363122160 | 0.0144959254932486 | 0.2862135228632265 |
| 0.8205460000000002 | 0.3465599999999966 | 0.0195900000000009 |
| 0.6538422346929537 | 0.0135325535398628 | 0.1238473576961509 |
| 0.9868871255201392 | 0.1794677124951175 | 0.2241604320163831 |
| 0.7367330000000010 | 0.4300550000000030 | 0.0814719999999980 |
| 0.5702424645520312 | 0.0973059794882218 | 0.1817404169385261 |
| 0.9030451028565080 | 0.2640403873907463 | 0.2863417398717563 |
| 0.0705460000000002 | 0.8465610000000012 | 0.0195900000000009 |
| 0.4040964861503774 | 0.5137286464382704 | 0.1239406989035466 |
| 0.2371601612389763 | 0.6810883032831748 | 0.2246524057317729 |
| 0.4867330000000010 | 0.9300550000000030 | 0.0814719999999980 |
| 0.3205794000340543 | 0.5971451231174628 | 0.1823691467150196 |
| 0.1534360912632808 | 0.7645806635643596 | 0.2866331366915754 |
| 0.0705460000000002 | 0.5965610000000012 | 0.0195900000000009 |
| 0.4039972007310303 | 0.7634055865225046 | 0.1239452379761198 |
| 0.2375626400854782 | 0.9309226962931494 | 0.2246691459627441 |

|                    |                    |                    |
|--------------------|--------------------|--------------------|
| 0.486733000000010  | 0.680053999999984  | 0.081471999999980  |
| 0.3202166197614549 | 0.8472686942857475 | 0.1822247281441884 |
| 0.1520120893127092 | 0.5124173866127504 | 0.2863022281975043 |
| 0.320545000000027  | 0.596561000000012  | 0.019590000000009  |
| 0.1541538341727554 | 0.7635266502100074 | 0.1240557835723686 |
| 0.4864591375737470 | 0.9313488850398007 | 0.2241641522544013 |
| 0.236733000000010  | 0.680055000000030  | 0.081471999999980  |
| 0.0702786228391911 | 0.8472802168672133 | 0.1820730171230746 |
| 0.320545000000027  | 0.846561000000012  | 0.019590000000009  |
| 0.1542559741998897 | 0.5137148066152042 | 0.1239409184801091 |
| 0.4875770837353471 | 0.6814061387112434 | 0.2248060851849324 |
| 0.236733000000010  | 0.930055000000030  | 0.081471999999980  |
| 0.0703749579950594 | 0.5974238471606576 | 0.1822075680761732 |
| 0.4055784118766612 | 0.7658665399480596 | 0.2863190108092596 |
| 0.570546000000002  | 0.846561000000012  | 0.019590000000009  |
| 0.9041288917340250 | 0.5139316021304021 | 0.1239033688733361 |
| 0.7377937087330932 | 0.6810163690028277 | 0.2247205226274478 |
| 0.986733000000010  | 0.930055000000030  | 0.081471999999980  |
| 0.8203856861331799 | 0.5973696444101130 | 0.1821722524229102 |
| 0.6531855902322916 | 0.7659014188012949 | 0.2863886700299432 |
| 0.570546000000002  | 0.596561000000012  | 0.019590000000009  |
| 0.9036298058241637 | 0.7635030228469879 | 0.1240305620378993 |

0.7388316576933073 0.9313800433299257 0.2242124772771929  
0.9867330000000010 0.6800550000000030 0.0814719999999980  
0.8203500129177063 0.8472425478862050 0.1821935440446511  
0.6534709198407976 0.5124595979162884 0.2864059466259635  
0.8205460000000002 0.5965610000000012 0.0195900000000009  
0.6538443273324179 0.7635045489744743 0.1239405221614087  
0.9871890863147168 0.9310288823983087 0.2246607433588482  
0.7367330000000010 0.6800550000000030 0.0814719999999980  
0.5705050973926068 0.8476269293114425 0.1815284913348662  
0.9034195515215321 0.5139447503621303 0.2862249132284373  
0.8205460000000002 0.8465610000000012 0.0195900000000009  
0.6537533932751026 0.5136683099640651 0.1239427784406577  
0.9872769996885454 0.6806065559010186 0.2246290621461783  
0.7367330000000010 0.9300550000000030 0.0814719999999980  
0.5700440142061608 0.5972069544301521 0.1824250250970318  
0.9040763926270867 0.7645230430561291 0.2866146391109721  
0.4040491953723601 0.5152114037195658 0.3329285187927307  
0.4034894261129073 0.5146414420185756 0.2973176218860049  
0.4036389999999983 0.2633080000000021 0.0542870000000022  
0.2377132504521420 0.4307868917050801 0.1530366530316178  
0.0708649469678615 0.0976771423101718 0.2520352935198293  
0.4036389999999983 0.0133080000000021 0.0542870000000022



0.2374079735628747 0.1809686480983174 0.1531741099800683  
0.0669278147551521 0.3458297393555316 0.2507227703261301  
0.153638999999983 0.013308000000021 0.054287000000022  
0.4869942887137236 0.1803598361028145 0.1528151402472706  
0.3199311985337521 0.3463054890795885 0.2521047368392410  
0.153638999999983 0.263308000000021 0.054287000000022  
0.4869114877097059 0.4307866520487739 0.1531273195351326  
0.3202346733070359 0.0975947101578002 0.2519872783679528  
0.903638999999983 0.263308000000021 0.054287000000022  
0.7373002464843258 0.4305640461974827 0.1528351749153284  
0.5708229513415823 0.0977004605770295 0.2514616595907085  
0.903638999999983 0.013308000000021 0.054287000000022  
0.7371554288812283 0.1805185089033229 0.1527061111969568  
0.5721875172212173 0.3459496240926752 0.2508164218375770  
0.653638999999983 0.013308000000021 0.054287000000022  
0.9871443318619091 0.1803402247835075 0.1528092356880420  
0.8205320366811806 0.3474115195800265 0.2515213421494293  
0.653638999999983 0.263308000000021 0.054287000000022  
0.9871242836742391 0.4306335835812521 0.1528483136741642  
0.8204534035195281 0.0977750193258881 0.2515380272595931  
0.403638999999983 0.763308000000021 0.054287000000022  
0.2371732325864752 0.9304991447916798 0.1531243941652390

|                    |                    |                    |
|--------------------|--------------------|--------------------|
| 0.0708087586429501 | 0.5979488577548588 | 0.2520275972837194 |
| 0.4036389999999983 | 0.5133080000000021 | 0.0542870000000022 |
| 0.2374351189314318 | 0.6802475981130873 | 0.1532378403116418 |
| 0.0704496778006801 | 0.8476181008516629 | 0.2516645387051597 |
| 0.1536389999999983 | 0.5133080000000021 | 0.0542870000000022 |
| 0.4869258349010550 | 0.6800001030633532 | 0.1530556979887207 |
| 0.3201996799227855 | 0.8472873555269106 | 0.2520469900146323 |
| 0.1536389999999983 | 0.7633080000000021 | 0.0542870000000022 |
| 0.4869928774096381 | 0.9304993370356466 | 0.1528588156217421 |
| 0.3198316766590362 | 0.5981794231795841 | 0.2520821908411744 |
| 0.9036389999999983 | 0.7633080000000021 | 0.0542870000000022 |
| 0.7373023602830554 | 0.9305569388417363 | 0.1528383171392064 |
| 0.5717099255158555 | 0.5980763743728199 | 0.2520868486668567 |
| 0.9036389999999983 | 0.5133080000000021 | 0.0542870000000022 |
| 0.7367050810684143 | 0.6802553975376573 | 0.1532025996471445 |
| 0.5722911975677245 | 0.8511623981217687 | 0.2507290062005733 |
| 0.6536389999999983 | 0.5133080000000021 | 0.0542870000000022 |
| 0.9871188346627893 | 0.6804492709584251 | 0.1531074790875297 |
| 0.8203936495734111 | 0.8472202300731156 | 0.2520621431624874 |
| 0.6536389999999983 | 0.7633080000000021 | 0.0542870000000022 |
| 0.9870977813657767 | 0.9304856837958275 | 0.1531140467776773 |
| 0.8205475388492511 | 0.5979054932300882 | 0.2519904924495822 |

TiH<sub>1.97</sub>-OH

|                    |                    |                    |
|--------------------|--------------------|--------------------|
| 10.193035999999993 | -5.920542000000002 | 0.022131000000000  |
| 0.000000000000000  | 11.796589000000009 | -0.015872000000000 |
| 0.000000000000000  | 0.000000000000000  | 27.290389999999986 |

|    |   |    |
|----|---|----|
| H  | O | Ti |
| 97 | 1 | 48 |

Selective dynamics

Direct

|                    |                    |                    |
|--------------------|--------------------|--------------------|
| 0.0704554421571896 | 0.3473966859788262 | 0.0197964854104839 |
| 0.4049549077458265 | 0.0141187972966206 | 0.1235728724039543 |
| 0.2331546821433930 | 0.1741037624193881 | 0.2217803394859823 |
| 0.4867459888352296 | 0.4303446827865666 | 0.0816704584551755 |
| 0.3196740949445629 | 0.0975557184218926 | 0.1806035829539938 |
| 0.1531150948920955 | 0.2630200946498829 | 0.2851637900631302 |
| 0.0704035693885849 | 0.0971054469893417 | 0.0193154953071982 |
| 0.4049773952952481 | 0.2650694102120990 | 0.1235945180812029 |
| 0.2385479356667856 | 0.4341924169373925 | 0.2250183868680026 |
| 0.4868599926650502 | 0.1802540632128893 | 0.0812830114242680 |
| 0.3193476374353406 | 0.3468332507013770 | 0.1800447418995204 |
| 0.1527203361363298 | 0.0148486999986369 | 0.2848531751857066 |
| 0.3214208752316406 | 0.0971012765963171 | 0.0193322043812533 |

0.1534062082102080 0.2650161178074774 0.1235153829057461  
0.4876160566175441 0.4341961708216998 0.2250442731311058  
0.2369165025061102 0.1804864100499265 0.0804174667324268  
0.0700307137295289 0.3479969475629079 0.1822500065152761  
0.4008730269616504 0.0143136058860842 0.2852107419093071  
0.3212096386644391 0.3478347137801380 0.0197471040137033  
0.1536406004269673 0.0139424289839120 0.1228732637602228  
0.4878590344339483 0.1819873769525279 0.2243398814405885  
0.2368653849357661 0.4303109128668752 0.0816496979041207  
0.0698820011530270 0.0975630929985754 0.1804983445969505  
0.4007727582677407 0.2630900375591556 0.2852209403673064  
0.5713762844541643 0.3474720282661410 0.0198720149247841  
0.9025403342577941 0.0141706716086756 0.1235134137289357  
0.7363430608744309 0.1808512365391853 0.2249905818387313  
0.9869356004695510 0.4304115247583308 0.0816662214003340  
0.8194131857190492 0.0973827957944645 0.1822581326192178  
0.6519444297489704 0.2642453905452914 0.2860065104301886  
0.5714022259368087 0.0970023777520906 0.0198018855539976  
0.9032909019876441 0.2643296318331494 0.1240619314819736  
0.7362566697305244 0.4315679760520200 0.2249859349412612  
0.9868928325250335 0.1803376935087308 0.0812616685712665  
0.8197835040634196 0.3476621261894663 0.1823515870170331

|                    |                    |                    |
|--------------------|--------------------|--------------------|
| 0.6532646766602420 | 0.0160821488214250 | 0.2877292866217788 |
| 0.8201187329530097 | 0.0970667245594826 | 0.0197947189374322 |
| 0.6543147221684388 | 0.2643813531895667 | 0.1240819233280239 |
| 0.9869730956079141 | 0.4314883307877972 | 0.2249929931754259 |
| 0.7368495947851753 | 0.1803233705512289 | 0.0816630894228324 |
| 0.5698232647373690 | 0.3480094315068801 | 0.1822869722285287 |
| 0.9044891154617664 | 0.0144169973346557 | 0.2851724804704264 |
| 0.8206798572905338 | 0.3468537613847537 | 0.0200338099946737 |
| 0.6538600393162380 | 0.0143852711362021 | 0.1241361870293589 |
| 0.9858130253699734 | 0.1819515668547547 | 0.2243447527943360 |
| 0.7368802383563718 | 0.4303833609893996 | 0.0817051127658100 |
| 0.5699560388425075 | 0.0973451122366721 | 0.1821984940719407 |
| 0.9031660978914142 | 0.2643731855539736 | 0.2859529372372298 |
| 0.0704012338676775 | 0.8460788208711055 | 0.0193310620279964 |
| 0.4038960897885738 | 0.5147103391501355 | 0.1244340242556767 |
| 0.2385467643125676 | 0.6802465815029060 | 0.2249927366311304 |
| 0.4868854718773471 | 0.9302489628219899 | 0.0816984195227429 |
| 0.3202187638268281 | 0.5977675841444392 | 0.1839709875098893 |
| 0.1532445200859010 | 0.7667057806526639 | 0.2852073853399081 |
| 0.0705136801501237 | 0.5961153393156829 | 0.0198040264464190 |
| 0.4040014329782962 | 0.7635977445846400 | 0.1244105544537518 |
| 0.2330743946385252 | 0.9347141848334314 | 0.2217554491792215 |

0.4868928441669610 0.6803628092021572 0.0822037431934555  
0.3194844027411464 0.8479431695213828 0.1800332968299095  
0.1514325846149156 0.5142611486484386 0.2877129122614715  
0.3209848873048037 0.5970226947476682 0.0200946974254629  
0.1534795340684906 0.7626662620224054 0.1235782994030728  
0.4875929678433985 0.9292494715836600 0.2250046465770660  
0.2370038768701564 0.6803711521568343 0.0816967569086446  
0.0698896461910999 0.8478013245925347 0.1806100301439979  
0.3884828820208857 0.4860002121861252 0.2829918292006522  
0.3212115608913630 0.8462869094343285 0.0196849214033341  
0.1532270873808469 0.5137467716634430 0.1241359821072807  
0.4864844276084986 0.6812774993318658 0.2233705781667203  
0.2370525719510936 0.9301972383885766 0.0804584205762184  
0.0700769287347044 0.5975051610136880 0.1821989171966084  
0.3884419184003463 0.7790785235006147 0.2829975840545952  
0.5704998007641574 0.8465350358873996 0.0200932134956245  
0.9032488566255831 0.5133301414547172 0.1240868303464972  
0.7335227325243380 0.6801562763495569 0.2250581479300651  
0.9867480152376107 0.9303276127299606 0.0804228082417712  
0.8194221860190348 0.5976291019991724 0.1822971692304908  
0.6814718873142754 0.7790125937208784 0.2830208787491948  
0.5704997634990481 0.5970261701814339 0.0201831920076574

0.9025140603243378 0.7626429165448043 0.1236005863857687  
0.7334783864839163 0.9292143502714524 0.2250412582928615  
0.9869936442833069 0.6804001536723724 0.0812955486682476  
0.8205513777580270 0.8480740497877038 0.1800590089518113  
0.6532392459097156 0.5142702991887889 0.2878237990905324  
0.8200514305590669 0.5961383159296034 0.0198712231448378  
0.6528859857195796 0.7637060225121218 0.1244377674257325  
0.9936473865340169 0.9346281858233740 0.2217879866156284  
0.7369080447362065 0.6805123630592830 0.0816783639167705  
0.5696306756253812 0.8471839630028501 0.1839944675800855  
0.9033064730712482 0.5156331583580002 0.2860036637407057  
0.8196759807234383 0.8462891467140612 0.0197423382593510  
0.6537353882045340 0.5138931724256117 0.1242317818870595  
0.9857969242405685 0.6799730842862618 0.2243479890358328  
0.7369356113588155 0.9303902352697344 0.0816556800322455  
0.5695054523955864 0.5978938230915228 0.1839682305400031  
0.9044147730135711 0.7667873660247866 0.2852268794555722  
0.4853183959991909 0.6810921838678710 0.3421243376437397  
0.4859242676726559 0.6813394605437588 0.3065446585113603  
0.4043039942743174 0.2639181966417034 0.0539605636238324  
0.2367813382725460 0.4320406680396185 0.1532979717691865  
0.0697216260209803 0.0979143064690047 0.2502709597613912

|                    |                    |                    |
|--------------------|--------------------|--------------------|
| 0.4043783390389908 | 0.0135509793353911 | 0.0539261486944689 |
| 0.2367923063174991 | 0.1808425277886662 | 0.1514708789551605 |
| 0.0709208032635829 | 0.3485025205226003 | 0.2519275516060984 |
| 0.1538870048121781 | 0.0134918364287138 | 0.0534294812831038 |
| 0.4874803604413112 | 0.1811266072121063 | 0.1527929686612384 |
| 0.3153123129020667 | 0.3393062695056639 | 0.2483793243231906 |
| 0.1536847605419736 | 0.2640305503860050 | 0.0538881829102291 |
| 0.4876761175128332 | 0.4321131015285236 | 0.1533443481464996 |
| 0.3195385035010457 | 0.0977805520701055 | 0.2504563653644672 |
| 0.9038272708093732 | 0.2635819931294463 | 0.0544742310605250 |
| 0.7365735518769900 | 0.4309737265822329 | 0.1534054113029029 |
| 0.5688313751025352 | 0.0968792643704272 | 0.2518385072701242 |
| 0.9033441862368621 | 0.0136891590937046 | 0.0538840242861659 |
| 0.7366944045714674 | 0.1807160756158229 | 0.1533133745334956 |
| 0.5689697975285763 | 0.3484749365899287 | 0.2520079468213112 |
| 0.6536687534974792 | 0.0133037823411611 | 0.0545757333864840 |
| 0.9863243059354860 | 0.1811592989681743 | 0.1527208098170081 |
| 0.8195515901226608 | 0.3481256574345278 | 0.2518418906242874 |
| 0.6537246887465062 | 0.2635634810198391 | 0.0544679470976979 |
| 0.9868062999578823 | 0.4308416409847979 | 0.1533152756583418 |
| 0.8191224132724061 | 0.0967023804116041 | 0.2519365232843349 |
| 0.4040949546742466 | 0.7633122947620872 | 0.0547332196905580 |



|                    |                    |                    |
|--------------------|--------------------|--------------------|
| 0.2367581378677914 | 0.9307776843921761 | 0.1515335696762076 |
| 0.0707728727751561 | 0.5988667865061577 | 0.2518379943093688 |
| 0.4039708985258062 | 0.5141772774562076 | 0.0547588700444479 |
| 0.2369647056933002 | 0.6795976923449404 | 0.1532977359036610 |
| 0.0698644436420948 | 0.8481446140608897 | 0.2504610395401434 |
| 0.1540992956584837 | 0.5137337488849369 | 0.0545753358130142 |
| 0.4866746357079078 | 0.6808323228766072 | 0.1544269104182652 |
| 0.3153532642578948 | 0.8523323436602915 | 0.2483829341389627 |
| 0.1538290825026062 | 0.7630152337073295 | 0.0539324777684790 |
| 0.4879171806952582 | 0.9305365316097205 | 0.1533026319622244 |
| 0.3229621149077235 | 0.5997104651841031 | 0.2560178964941884 |
| 0.9034771401545058 | 0.7630932402393139 | 0.0539605336499083 |
| 0.7354482763366101 | 0.9307241436252279 | 0.1533055782364803 |
| 0.5678656065344719 | 0.5996909063550808 | 0.2559544581191475 |
| 0.9038505169246589 | 0.5136878652446631 | 0.0544705280037370 |
| 0.7353958194398247 | 0.6798453123821216 | 0.1533510889633752 |
| 0.5678464568176188 | 0.8445920919648637 | 0.2560641602059418 |
| 0.6536566187434646 | 0.5137617332111070 | 0.0546818090552083 |
| 0.9863834168243244 | 0.6800698923865823 | 0.1527996412794230 |
| 0.8282923510418553 | 0.8523421030984785 | 0.2483881819789638 |
| 0.6532383317414087 | 0.7634391206754384 | 0.0547606990245068 |
| 0.9866549505412769 | 0.9307378484151617 | 0.1514792746214199 |

0.8191581968698507 0.5987041766941701 0.2520191350840450

## Supplementary References

1. Kresse G, Furthmüller J. Efficiency of ab-initio total energy calculations for metals and semiconductors using a plane-wave basis set. *Comput. Mater. Sci.* **6**, 15-50 (1996).
2. Kresse G, Furthmüller J. Efficient iterative schemes for ab initio total-energy calculations using a plane-wave basis set. *Phys. Rev. B.* **54**, 11169-11186 (1996).
3. Perdew JP, Burke K, Ernzerhof M. Generalized Gradient Approximation Made Simple. *Phys. Rev. Lett.* **77**, 3865-3868 (1996).
4. Monkhorst HJ, Pack JD. Special points for Brillouin-zone integrations. *Phys. Rev. B.* **13**, 5188-5192 (1976).
5. Blöchl PE. Projector augmented-wave method. *Phys. Rev. B.* **50**, 17953-17979 (1994).
6. Grimme S, Antony J, Ehrlich S, Krieg H. A consistent and accurate ab initio parametrization of density functional dispersion correction (DFT-D) for the 94 elements H-Pu. *J. Chem. Phys.* **132**, 154104 (2010).
7. Xu H, Cheng D, Cao D, Zeng XC. A universal principle for a rational design of single-atom electrocatalysts. *Nat. Catal.* **1**, 339-348 (2018).
8. Mathew K, et al. Implicit solvation model for density-functional study of nanocrystal surfaces and reaction pathways. *J. Chem. Phys.* **140**, 084106 (2014).
9. Henkelman G, Uberuaga BP, Jónsson H. A climbing image nudged elastic band method for finding saddle points and minimum energy paths. *J. Chem. Phys.* **113**, 9901-9904 (2000).

10. Rossmeisl J, Logadottir A, Nørskov JK. Electrolysis of water on (oxidized) metal surfaces. *Chem. Phys.* **319**, 178-184 (2005).
11. Peterson AA, et al. How copper catalyzes the electroreduction of carbon dioxide into hydrocarbon fuels. *Energy Environ. Sci.* **3**, 1311-1315 (2010).
12. Chen FY, et al. Efficient conversion of low-concentration nitrate sources into ammonia on a Ru-dispersed Cu nanowire electrocatalyst. *Nat. Nanotechnol.* **17**, 759-767 (2022).
13. Guo W, et al. Accelerating multielectron reduction at  $\text{Cu}_x\text{O}$  nanograins interfaces with controlled local electric field. *Nat. Commun.* **14**, 7383 (2023).
14. Fang J-Y, et al. Ampere-level current density ammonia electrochemical synthesis using  $\text{CuCo}$  nanosheets simulating nitrite reductase bifunctional nature. *Nat. Commun.* **13**, 7899 (2022).
15. Huang L, et al. Direct Synthesis of Ammonia from Nitrate on Amorphous Graphene with Near 100% Efficiency. *Adv. Mater.* **35**, 2211856 (2023).
16. Zhang M, et al. Efficient Electrochemical Nitrate Reduction to Ammonia Driven by a Few Nanometer-Confined Built-In Electric Field. *ACS Catal.* **14**, 10437-10446 (2024).
17. Li Y, et al. The synergistic catalysis effect on electrochemical nitrate reduction at the dual-function active sites of the heterostructure. *Energy Environ. Sci.* **17**, 4582-4593 (2024).
18. Hu Q, et al. Designing Efficient Nitrate Reduction Electrocatalysts by Identifying and Optimizing Active Sites of Co-Based Spinels. *J. Am. Chem. Soc.* **146**, 2967-

2976 (2024).

19. Li J, et al. Microenvironmental corrosion and hydrolysis induced two-dimensional heterojunction of copper oxide@ferrihydrite for efficient electrochemical nitrate reduction to ammonia. *Chem. Eng. J.* **471**, 144488 (2023).
20. Li X, Shen P, Li X, Ma D, Chu K. Sub-nm RuO<sub>x</sub> Clusters on Pd Metallene for Synergistically Enhanced Nitrate Electroreduction to Ammonia. *ACS Nano.* **17**, 1081-1090 (2023).
21. Li J, Li H, Fan K, Lee JY, Xie W, Shao M. Electrocatalytic nitrate reduction to ammonia coupled with organic oxidation. *Chem Catalysis.* **3**, 100638 (2023).
22. Wang Y, et al. Enhanced Nitrate-to-Ammonia Activity on Copper–Nickel Alloys via Tuning of Intermediate Adsorption. *J. Am. Chem. Soc.* **142**, 5702-5708 (2020).
23. Zhang G, Li X, Chen K, Guo Y, Ma D, Chu K. Tandem Electrocatalytic Nitrate Reduction to Ammonia on MBenes. *Angew. Chemie Int. Ed.* **62**, e202300054 (2023).
24. Song Z, Liu Y, Zhong Y, Guo Q, Zeng J, Geng Z. Efficient Electroreduction of Nitrate into Ammonia at Ultralow Concentrations Via an Enrichment Effect. *Adv. Mater.* **34**, 2204306 (2022).
25. Hao R, et al. Pollution to solution: A universal electrocatalyst for reduction of all NO<sub>x</sub>-based species to NH<sub>3</sub>. *Chem Catal.* **2**, 622-638 (2022).
26. Xiao Y, et al. Strained Au skin on Mesoporous Intermetallic AuCu<sub>3</sub> Nanocoral for Electrocatalytic Conversion of Nitrate to Ammonia across a Wide Concentration Range. *Angew. Chemie Int. Ed.* **n/a**, e202408758 (2024).

27. Zhang N, et al. Governing Interlayer Strain in Bismuth Nanocrystals for Efficient Ammonia Electrosynthesis from Nitrate Reduction. *ACS Nano*. **16**, 4795-4804 (2022).
28. Feng X, et al. Cu/Cu<sub>x</sub>O/Graphdiyne Tandem Catalyst for Efficient Electrocatalytic Nitrate Reduction to Ammonia. *Adv. Mater.* **n/a**, e2405660 (2024).
29. Zhang Z, et al. Graphdiyne Enabled Nitrogen Vacancy Formation in Copper Nitride for Efficient Ammonia Synthesis. *J. Am. Chem. Soc.* **146**, 14898-14904 (2024).
30. Fang Z, Jin Z, Tang S, Li P, Wu P, Yu G. Porous Two-dimensional Iron-Cyano Nanosheets for High-rate Electrochemical Nitrate Reduction. *ACS Nano*. **16**, 1072-1081 (2022).
